# Supplementary material for: Toward best practices for detecting germline small variants: a large-scale real-world WES benchmarking study using the Quartet DNA reference materials
Source: Research Square preprint supplement (doi:10.21203/rs.3.rs-4525252/v1), 2024-07-09
Supplement: Supplementary file 1 [file 64d596ed08671d5223e1f5aa.xlsx]

## Sheet: Supplementary_Table_3_GeneList
Gene_Name	Chrom	StartPos	EndPos	Source
A2ML1	chr12	8822621	8887001	clinigen
A4GALT	chr22	42692121	42721298	clinigen
AAGAB	chr15	67200667	67255195	clinigen
AARS1	chr16	70251983	70289707	clinigen
AARS2	chr6	44298731	44313347	clinigen
AASS	chr7	122064583	122144308	clinigen
ABAT	chr16	8674596	8784575	clinigen
ABCA4	chr1	93992834	94121148	clinigen
ABCB1	chr7	87503017	87713323	clinigen
ABCB11	chr2	168915498	169031324	clinigen,tcga,cogiv
ABCB4	chr7	87401696	87480435	clinigen
ABCC4	chr13	95019835	95301475	clinigen
ABCC8	chr11	17392498	17476894	clinigen
ABCC9	chr12	21797389	21942543	clinigen
ABCD1	chrX	153724856	153744755	clinigen
ABCD3	chr1	94418389	94518666	clinigen
ABCG2	chr4	88090150	88231628	clinigen
ABCG5	chr2	43812472	43838865	clinigen
ABCG8	chr2	43831942	43882988	clinigen
ABHD12	chr20	25294742	25390835	clinigen
ABHD5	chr3	43690108	43734371	clinigen
ABL2	chr1	179099330	179229684	clinigen
ABR	chr17	1003519	1229738	clinigen
ABRAXAS1	chr4	83459517	83523348	clinigen
ACAD8	chr11	134253548	134265855	clinigen
ACAD9	chr3	128879596	128924003	clinigen
ACADL	chr2	210187126	210225447	clinigen
ACADM	chr1	75724431	75787575	clinigen
ACADS	chr12	120725774	120740008	clinigen
ACADSB	chr10	123008979	123058290	clinigen
ACADVL	chr17	7217125	7225266	clinigen
ACAT1	chr11	108116695	108147603	clinigen
ACAT2	chr6	159762045	159779112	clinigen
ACBD5	chr10	27168135	27243046	clinigen
ACD	chr16	67657512	67660810	clinigen
ACE	chr17	63477061	63498380	clinigen
ACOX1	chr17	75941507	75979177	clinigen
ACOX2	chr3	58505136	58537283	clinigen
ACP5	chr19	11574653	11579993	clinigen
ACSF3	chr16	89088375	89164121	clinigen
ACSL4	chrX	109624244	109733403	clinigen
ACTA1	chr1	229430365	229434104	clinigen
ACTA2	chr10	88934822	88991339	clinigen,cogiv
ACTB	chr7	5526409	5563902	clinigen
ACTC1	chr15	34790107	34795589	clinigen
ACTG1	chr17	81509413	81523847	clinigen
ACTL6B	chr7	100643097	100656448	clinigen
ACTN1	chr14	68874128	68979440	clinigen
ACTN2	chr1	236664141	236764631	clinigen
ACVR1	chr2	157736251	157876330	clinigen
ACVRL1	chr12	51906908	51923361	clinigen
ACY1	chr3	51983340	51989197	clinigen
ACYP2	chr2	53970838	54305300	clinigen
ADA	chr20	44584896	44652252	clinigen
ADA2	chr22	17178790	17258235	clinigen
ADAM17	chr2	9488486	9556732	clinigen
ADAM9	chr8	38996754	39105445	clinigen
ADAMTS13	chr9	133414358	133459402	clinigen
ADAMTS17	chr15	99971437	100342005	clinigen
ADAMTS18	chr16	77247813	77435034	clinigen
ADAMTS2	chr5	179110853	179345461	clinigen
ADAMTS9	chr3	64515654	64688000	clinigen
ADAMTSL2	chr9	133532164	133575519	clinigen
ADAR	chr1	154581695	154628013	clinigen
ADCY1	chr7	45574140	45723116	clinigen
ADD1	chr4	2843844	2930076	clinigen
ADD3	chr10	109996368	110135565	clinigen
ADGRG1	chr16	57610652	57665580	clinigen
ADGRV1	chr5	90529344	91164437	clinigen
ADK	chr10	74151202	74709963	clinigen
ADNP	chr20	50888916	50931437	clinigen
ADORA2A	chr22	24417879	24442357	clinigen
ADRB1	chr10	114043866	114046904	clinigen
ADRB2	chr5	148826611	148828623	clinigen
ADSL	chr22	40346461	40390463	clinigen
AFF2	chrX	148500617	149000663	clinigen
AGA	chr4	177430774	177442437	clinigen
AGK	chr7	141551278	141655244	clinigen
AGL	chr1	99850361	99924023	clinigen,cogiv
AGPAT2	chr9	136673143	136687457	clinigen
AGPS	chr2	177392746	177567024	clinigen
AGRN	chr1	1020120	1056118	clinigen
AGT	chr1	230690776	230745576	clinigen
AGTR2	chrX	116170744	116174974	clinigen
AGXT	chr2	240868824	240880502	clinigen,cogiv
AHCY	chr20	34280268	34311802	clinigen
AHDC1	chr1	27534035	27604431	clinigen
AHI1	chr6	135283407	135498434	clinigen
AICDA	chr12	8602155	8613242	clinigen
AIFM1	chrX	130124666	130165879	clinigen
AIMP1	chr4	106315544	106349456	clinigen
AIPL1	chr17	6393693	6435199	clinigen
AK2	chr1	33007986	33080996	clinigen
AK7	chr14	96392128	96489427	clinigen
AKAP9	chr7	91940840	92110673	clinigen
AKT1	chr14	104769349	104795759	clinigen
AKT2	chr19	40230317	40285536	clinigen
AKT3	chr1	243488233	243851079	clinigen
ALAD	chr9	113386312	113401290	clinigen
ALAS2	chrX	55009055	55030977	clinigen
ALDH18A1	chr10	95605941	95656711	clinigen
ALDH1A3	chr15	100877714	100916626	clinigen
ALDH2	chr12	111766887	111817532	clinigen
ALDH3A2	chr17	19648136	19685760	clinigen
ALDH4A1	chr1	18871430	18902724	clinigen
ALDH5A1	chr6	24494867	24537207	clinigen
ALDH6A1	chr14	74056847	74084492	clinigen
ALDH7A1	chr5	126531200	126595362	clinigen
ALDOA	chr16	30064164	30070457	clinigen
ALDOB	chr9	101420560	101449664	clinigen
ALG1	chr16	5033702	5087379	clinigen
ALG11	chr13	52012391	52079232	clinigen
ALG12	chr22	49900229	49918438	clinigen
ALG13	chrX	111665811	111760649	clinigen
ALG2	chr9	99216425	99221942	clinigen
ALG3	chr3	184242301	184249548	clinigen
ALG6	chr1	63367575	63438553	clinigen
ALG8	chr11	78095244	78139660	clinigen
ALG9	chr11	111782195	111871581	clinigen
ALK	chr2	29192774	29921586	clinigen,tcga,cogiv
ALMS1	chr2	73385758	73625166	clinigen
ALPK3	chr15	84817356	84873479	clinigen
ALPL	chr1	21509397	21578410	clinigen
ALS2	chr2	201700267	201782112	clinigen
ALX1	chr12	85280220	85301784	clinigen
ALX3	chr1	110059870	110070672	clinigen
ALX4	chr11	44260440	44310139	clinigen
AMACR	chr5	33986165	34008104	clinigen
AMH	chr19	2249309	2252073	clinigen
AMN	chr14	102922663	102933596	clinigen
AMT	chr3	49416778	49422685	clinigen
ANG	chr14	20684177	20698971	clinigen
ANGPTL3	chr1	62597520	62606313	clinigen
ANK1	chr8	41653220	41896741	clinigen
ANK2	chr4	112818032	113384221	clinigen
ANK3	chr10	60026298	60733490	clinigen
ANKH	chr5	14704800	14871778	clinigen
ANKK1	chr11	113387779	113400416	clinigen
ANKRD1	chr10	90912096	90921087	clinigen
ANKRD11	chr16	89267630	89490561	clinigen
ANKRD17	chr4	73073376	73258798	clinigen
ANKRD26	chr10	26973793	27100494	clinigen
ANKS6	chr9	98731329	98796965	clinigen
ANO5	chr11	21782659	22283567	clinigen
ANO6	chr12	45215987	45482280	clinigen
ANOS1	chrX	8528874	8732137	clinigen
ANTXR2	chr4	79901146	80125454	clinigen,cogiv
ANXA11	chr10	80150889	80205572	clinigen
AP1S1	chr7	101154456	101161596	clinigen
AP1S2	chrX	15825806	15854931	clinigen
AP3B1	chr5	78000522	78294762	clinigen
AP3D1	chr19	2100988	2164468	clinigen
AP4B1	chr1	113894194	113905712	clinigen
AP4E1	chr15	50908672	51005895	clinigen
AP4M1	chr7	100100858	100110345	clinigen
AP4S1	chr14	31025106	31130996	clinigen
AP5Z1	chr7	4775615	4794397	clinigen
APC	chr5	112707518	112846239	clinigen,tcga,cogiv
APC2	chr19	1446302	1473244	clinigen
APOB	chr2	21001429	21044073	clinigen
APOC2	chr19	44946035	44949565	clinigen
APOE	chr19	44905791	44909393	clinigen
APOL1	chr22	36253071	36267530	clinigen
APP	chr21	25880535	26171128	clinigen
APPL1	chr3	57227726	57278105	clinigen
AQP1	chr7	30911853	30925517	clinigen
AQP5	chr12	49961872	49965682	clinigen
AR	chrX	67544021	67730619	clinigen,tcga,cogiv
ARCN1	chr11	118572390	118603033	clinigen
ARFGEF2	chr20	48921711	49036693	clinigen
ARG1	chr6	131470832	131584332	clinigen
ARHGAP11B	chr15	30624494	30649529	clinigen
ARHGAP31	chr3	119294383	119420714	clinigen
ARHGEF1	chr19	41883173	41930150	clinigen
ARHGEF10	chr8	1823926	1958641	clinigen
ARHGEF4	chr2	130836914	131047263	clinigen
ARHGEF6	chrX	136665547	136780932	clinigen
ARHGEF9	chrX	63634967	63809274	clinigen
ARID1A	chr1	26693236	26782104	clinigen
ARID1B	chr6	156776020	157210779	clinigen
ARID2	chr12	45729706	45908040	clinigen
ARL13B	chr3	93980139	94055678	clinigen
ARL2BP	chr16	57245259	57253635	clinigen
ARL6	chr3	97764521	97801229	clinigen
ARL6IP1	chr16	18791669	18801572	clinigen
ARMC2	chr6	108848416	108974476	clinigen
ARMC9	chr2	231198546	231376848	clinigen
ARPC1B	chr7	99374249	99394816	clinigen
ARPP21	chr3	35638945	35794496	clinigen
ARSA	chr22	50622754	50628173	clinigen,cogiv
ARSB	chr5	78777209	78986087	clinigen
ARSD	chrX	2903972	2929349	clinigen
ARSL	chrX	2934045	2968475	clinigen
ARX	chrX	25003694	25016420	clinigen
ASAH1	chr8	18055992	18084998	clinigen
ASB10	chr7	151175698	151187832	clinigen
ASH1L	chr1	155335268	155563162	clinigen
ASL	chr7	66075800	66094697	clinigen
ASNS	chr7	97851677	97872542	clinigen
ASPA	chr17	3472374	3503405	clinigen
ASPH	chr8	61500556	61714640	clinigen
ASPM	chr1	197084121	197146694	clinigen
ASS1	chr9	130444961	130501274	clinigen,cogiv
ASTN2	chr9	116423112	117415070	clinigen
ASXL1	chr20	32358330	32439319	clinigen
ASXL2	chr2	25733753	25878487	clinigen
ASXL3	chr18	33578219	33751195	clinigen
ATCAY	chr19	3879864	3928082	clinigen
ATE1	chr10	121709393	121928801	clinigen
ATF6	chr1	161766298	161977574	clinigen
ATG5	chr6	106045423	106325791	clinigen
ATG7	chr3	11272309	11557665	clinigen
ATIC	chr2	215311956	215349773	clinigen
ATL1	chr14	50532509	50634017	clinigen
ATL3	chr11	63624087	63671921	clinigen
ATM	chr11	108222804	108369102	clinigen,tcga,cogiv
ATP10A	chr15	25677273	25865184	clinigen
ATP13A2	chr1	16985958	17011928	clinigen
ATP13A3	chr3	194402672	194498364	clinigen
ATP1A1	chr1	116372668	116410261	clinigen
ATP1A2	chr1	160115759	160143591	clinigen
ATP1A3	chr19	41966582	41997497	clinigen
ATP2A1	chr16	28878405	28904466	clinigen
ATP2C2	chr16	84368527	84464187	clinigen
ATP5MK	chr10	103389041	103396492	clinigen
ATP6AP1	chrX	154428633	154436516	clinigen
ATP6AP2	chrX	40579372	40606848	clinigen
ATP6V0A2	chr12	123712353	123761755	clinigen
ATP6V0A4	chr7	138706294	138799560	clinigen
ATP6V1B1	chr2	70935900	70965431	clinigen
ATP6V1E1	chr22	17592136	17628749	clinigen
ATP7A	chrX	77910690	78050395	clinigen
ATP7B	chr13	51930436	52012125	clinigen,cogiv
ATP8A2	chr13	25371974	26025851	clinigen
ATPAF2	chr17	17977409	18039209	clinigen
ATR	chr3	142449007	142578733	clinigen,tcga,cogiv
ATRX	chrX	77504880	77786233	clinigen
AUH	chr9	91213815	91361918	clinigen
AUTS2	chr7	69598296	70793506	clinigen
AVPR1A	chr12	63142759	63151201	clinigen
AVPR2	chrX	153902531	153907166	clinigen
AXIN2	chr17	65528563	65561648	clinigen,tcga,cogiv
B3GALNT2	chr1	235447190	235504452	clinigen
B3GALT6	chr1	1232237	1235041	clinigen
B4GALNT1	chr12	57623409	57633239	clinigen
B4GALT1	chr9	33104082	33167356	clinigen
B4GALT7	chr5	177600132	177610330	clinigen
B4GAT1	chr11	66345374	66347629	clinigen
B9D1	chr17	19334308	19378193	clinigen
B9D2	chr19	41354417	41364165	clinigen
BAAT	chr9	101354182	101385400	clinigen
BACH2	chr6	89926528	90296843	clinigen
BAG3	chr10	119651380	119677819	clinigen
BAP1	chr3	52401008	52410008	clinigen,tcga,cogiv
BARD1	chr2	214725646	214809683	clinigen,tcga,cogiv
BAZ2B	chr2	159318979	159616569	clinigen
BBS12	chr4	122732702	122744942	clinigen
BBS5	chr2	169479480	169506655	clinigen
BBS7	chr4	121824329	121870487	clinigen
BCAP31	chrX	153700492	153724565	clinigen
BCAT2	chr19	48795062	48811029	clinigen
BCHE	chr3	165772904	165837462	clinigen,cogiv
BCKDHA	chr19	41397808	41425002	clinigen
BCKDHB	chr6	80106647	80346270	clinigen
BCKDK	chr16	31106107	31112791	clinigen
BCL10	chr1	85265776	85276632	clinigen
BCL11A	chr2	60450520	60554467	clinigen
BCL2L11	chr2	111119378	111168444	clinigen
BCL9	chr1	147541501	147626216	clinigen
BCLAF1	chr6	136256627	136289851	clinigen
BCOR	chrX	40049815	40177329	clinigen
BCR	chr22	23179704	23318037	clinigen
BCS1L	chr2	218658764	218663443	clinigen
BDP1	chr5	71455651	71567820	clinigen
BGN	chrX	153494980	153509546	clinigen
BIN1	chr2	127048027	127107288	clinigen
BLK	chr8	11486894	11564599	clinigen
BLM	chr15	90717346	90816166	clinigen,tcga,cogiv
BLNK	chr10	96189171	96271587	clinigen
BLOC1S3	chr19	45178784	45216933	clinigen
BLOC1S6	chr15	45587214	45615945	clinigen
BMP10	chr2	68860909	68871397	clinigen
BMP4	chr14	53949736	53958761	clinigen
BMPER	chr7	33904308	34156427	clinigen
BMPR1A	chr10	86755786	86932825	clinigen,tcga
BMPR1B	chr4	94757955	95158448	clinigen
BMPR2	chr2	202376327	202567751	clinigen
BPHL	chr6	3118374	3153578	clinigen
BPNT2	chr8	56957931	56993867	clinigen
BPTF	chr17	67825503	67984378	clinigen
BPY2	chrY	22973819	23005465	clinigen
BRAF	chr7	140719327	140924929	clinigen,tcga
BRAT1	chr7	2537810	2555694	clinigen
BRCA1	chr17	43044295	43170245	clinigen,tcga,cogiv
BRCA2	chr13	32315086	32400268	clinigen,tcga,cogiv
BRD4	chr19	15235519	15332545	clinigen
BRIP1	chr17	61679139	61863559	clinigen,tcga,cogiv
BRPF1	chr3	9731729	9748019	clinigen
BRSK2	chr11	1389899	1462689	clinigen
BRWD1	chr21	39184176	39321559	clinigen
BRWD3	chrX	80669503	80809877	clinigen
BSCL2	chr11	62689289	62709845	clinigen
BSND	chr1	54998933	55017172	clinigen
BTD	chr3	15601341	15722311	clinigen
BTK	chrX	101349338	101390796	clinigen
BUB1B	chr15	40161023	40221123	clinigen,tcga,cogiv
BVES	chr6	105096822	105137157	clinigen
C11orf65	chr11	108308519	108467531	clinigen
C12orf43	chr12	121000486	121016502	clinigen
C19orf12	chr19	29698937	29715789	clinigen
C1QB	chr1	22652762	22661637	clinigen
C1QBP	chr17	5432777	5448830	clinigen
C2CD3	chr11	74012718	74171210	clinigen
C8orf34	chr8	68330955	68819023	clinigen
C9orf72	chr9	27535640	27573866	clinigen
CA12	chr15	63321378	63381846	clinigen
CA5A	chr16	87881546	87936580	clinigen
CA8	chr8	60185412	60281400	clinigen
CABP2	chr11	67518912	67524517	clinigen
CABP4	chr11	67452406	67461752	clinigen
CACNA1A	chr19	13206442	13624489	clinigen
CACNA1B	chr9	137877782	138124624	clinigen
CACNA1C	chr12	1970772	2697950	clinigen
CACNA1D	chr3	53328963	53813733	clinigen
CACNA1F	chrX	49205063	49233371	clinigen
CACNA1H	chr16	1153103	1224169	clinigen
CACNA1S	chr1	201039512	201112451	clinigen
CACNA2D1	chr7	81946444	82443956	clinigen
CACNA2D4	chr12	1791963	1918666	clinigen
CACNB2	chr10	18140424	18543557	clinigen
CACNB4	chr2	151832771	152099167	clinigen
CACNG2	chr22	36560857	36703752	clinigen
CADPS2	chr7	122318411	122886759	clinigen
CALM1	chr14	90396502	90408268	clinigen
CALM2	chr2	47160084	47176921	clinigen
CALM3	chr19	46601074	46610782	clinigen
CALR3	chr19	16479061	16496167	clinigen
CALU	chr7	128739292	128773400	clinigen
CAMK2A	chr5	150219491	150290093	clinigen
CAMK2B	chr7	44210019	44334577	clinigen
CAMK2G	chr10	73812501	73874591	clinigen
CAMTA1	chr1	6785454	7769706	clinigen
CANT1	chr17	78991716	79009867	clinigen
CAPN3	chr15	42359498	42412949	clinigen
CAPN5	chr11	77066961	77126155	clinigen
CARD11	chr7	2906142	3044228	clinigen
CARD14	chr17	80169992	80216073	clinigen
CARD9	chr9	136363956	136373681	NA,cogiv
CARS2	chr13	110641412	110713603	clinigen
CASK	chrX	41514934	41923554	clinigen
CASP10	chr2	201182872	201229428	clinigen
CASQ2	chr1	115698038	115793195	clinigen
CASR	chr3	122183668	122291629	clinigen
CASZ1	chr1	10636604	10796650	clinigen
CAT	chr11	34438934	34472060	clinigen
CATSPER2	chr15	43628503	43668118	clinigen
CAV1	chr7	116524994	116561179	clinigen
CAV3	chr3	8733802	8841808	clinigen
CBFB	chr16	67028984	67101058	clinigen
CBL	chr11	119206298	119313926	clinigen,tcga,cogiv
CBR3	chr21	36135079	36146562	clinigen
CBS	chr21	43053191	43076943	clinigen
CBY2	chr13	45702320	45714559	clinigen
CC2D1A	chr19	13906201	13930879	clinigen
CC2D2A	chr4	15469865	15601552	clinigen
CCBE1	chr18	59430939	59697662	clinigen
CCDC103	chr17	44899142	44905390	clinigen
CCDC22	chrX	49235470	49250520	clinigen
CCDC39	chr3	180602858	180684942	clinigen
CCDC40	chr17	80036632	80100613	clinigen
CCDC50	chr3	191329085	191398659	clinigen
CCDC78	chr16	722582	726954	clinigen
CCDC8	chr19	46410329	46413564	clinigen
CCHCR1	chr6	31142439	31158238	clinigen
CCM2	chr7	44999475	45076469	clinigen
CCN6	chr6	112054075	112069686	clinigen
CCNF	chr16	2429394	2458854	clinigen
CCNO	chr5	55231152	55233608	clinigen
CCNQ	chrX	153587925	153600045	clinigen
CCT5	chr5	10249929	10266389	clinigen
CD164	chr6	109366514	109382467	clinigen
CD19	chr16	28931965	28939342	clinigen
CD247	chr1	167425027	167518640	clinigen
CD27	chr12	6444955	6451718	clinigen
CD320	chr19	8302127	8308358	clinigen
CD36	chr7	80369575	80679277	clinigen
CD3D	chr11	118339075	118342705	clinigen
CD3E	chr11	118304730	118316175	clinigen
CD3G	chr11	118344344	118355161	clinigen
CD40	chr20	46118271	46129863	clinigen
CD40LG	chrX	136648158	136660390	clinigen
CD59	chr11	33703010	33736479	clinigen
CD79A	chr19	41877279	41881372	clinigen
CD79B	chr17	63928738	63932336	clinigen
CD81	chr11	2376177	2397802	clinigen
CD8A	chr2	86784610	86808396	clinigen
CDAN1	chr15	42723544	42737128	clinigen
CDC14A	chr1	100345001	100520277	clinigen
CDC42	chr1	22052627	22101360	clinigen
CDC42BPB	chr14	102932380	103057549	clinigen
CDC45	chr22	19479457	19520612	clinigen
CDC73	chr1	193121983	193254815	clinigen,tcga
CDCA7	chr2	173354820	173368997	clinigen
CDH1	chr16	68737292	68835537	clinigen,tcga,cogiv
CDH15	chr16	89171748	89195492	clinigen
CDH2	chr18	27932879	28177946	clinigen
CDH23	chr10	71396920	71815947	clinigen
CDH3	chr16	68636189	68727468	clinigen
CDHR1	chr10	84194537	84219621	clinigen
CDIN1	chr15	36579626	36810248	clinigen
CDK13	chr7	39950121	40099580	clinigen
CDK16	chrX	47217860	47229997	clinigen
CDK4	chr12	57747727	57756013	clinigen,tcga
CDK5RAP2	chr9	120388875	120580170	clinigen
CDK6	chr7	92604921	92836573	clinigen
CDKL5	chrX	18425583	18653629	clinigen
CDKN1B	chr12	12685498	12722369	clinigen,tcga,cogiv
CDKN1C	chr11	2883213	2885775	clinigen,tcga
CDKN2A	chr9	21967752	21995301	clinigen,tcga,cogiv
CDT1	chr16	88803789	88809258	clinigen
CDX2	chr13	27960918	27969315	clinigen
CDY1	chrY	25622117	25624902	clinigen
CEACAM16	chr19	44699151	44710718	clinigen
CEBPA	chr19	33299934	33302534	clinigen,tcga
CEBPE	chr14	23117036	23120256	clinigen
CEL	chr9	133061981	133071861	clinigen
CELF4	chr18	37243040	37565827	clinigen
CEMIP	chr15	80779343	80951776	clinigen
CENPJ	chr13	24882279	24922889	clinigen
CENPP	chr9	92325953	92620529	clinigen
CEP152	chr15	48712928	48811146	clinigen
CEP164	chr11	117314557	117413266	clinigen
CEP290	chr12	88049016	88142099	clinigen
CEP41	chr7	130393771	130442433	NA,cogiv
CEP57	chr11	95789965	95832693	clinigen
CEP78	chr9	78236062	78279690	clinigen
CERKL	chr2	181535041	181680665	clinigen
CERS3	chr15	100400395	100544995	clinigen
CERT1	chr5	75356345	75512138	clinigen
CES1	chr16	55802851	55833337	clinigen
CETP	chr16	56961923	56983845	clinigen
CFAP221	chr2	119544432	119662251	clinigen
CFAP298	chr21	32592079	32612603	clinigen
CFAP300	chr11	102047437	102084554	clinigen
CFAP418	chr8	95244913	95269201	clinigen
CFAP43	chr10	104129888	104232364	clinigen
CFAP47	chrX	35919734	36385317	clinigen
CFAP53	chr18	50227193	50266495	clinigen
CFAP57	chr1	43172330	43254358	clinigen
CFB	chr6	31945650	31952086	clinigen
CFC1	chr2	130592165	130599575	clinigen
CFD	chr19	859453	867884	clinigen
CFH	chr1	196651754	196752476	clinigen
CFI	chr4	109731008	109802150	clinigen
CFL2	chr14	34709113	34714823	clinigen
CFTR	chr7	117287120	117715971	clinigen
CHAMP1	chr13	114314482	114337626	clinigen
CHAT	chr10	49609095	49667942	clinigen
CHCHD10	chr22	23765834	23767972	clinigen
CHD1L	chr1	147242654	147295765	clinigen
CHD2	chr15	92886203	93027996	clinigen
CHD3	chr17	7884796	7912760	clinigen
CHD4	chr12	6570082	6614524	clinigen
CHD5	chr1	6101787	6180321	clinigen
CHD7	chr8	60678740	60868028	clinigen
CHD8	chr14	21385194	21456126	clinigen
CHEK1	chr11	125625163	125676255	clinigen
CHEK2	chr22	28687743	28742422	clinigen,tcga,cogiv
CHKB	chr22	50578959	50601455	clinigen
CHM	chrX	85861180	86047561	clinigen
CHMP1A	chr16	89640816	89657738	clinigen
CHMP2B	chr3	87227271	87255556	clinigen
CHMP7	chr8	23243637	23262000	clinigen
CHRDL1	chrX	110673856	110795819	clinigen
CHRM3	chr1	239386565	239915452	clinigen
CHRNA2	chr8	27459756	27479883	clinigen
CHRNA3	chr15	78593052	78621295	clinigen
CHRNA4	chr20	63343223	63378401	clinigen
CHRNA5	chr15	78565520	78595269	clinigen
CHRNA7	chr15	31923438	32173018	clinigen
CHRNB2	chr1	154567778	154580013	clinigen
CHRNG	chr2	232539692	232548115	clinigen
CHST6	chr16	75472052	75495445	clinigen
CHSY1	chr15	101175727	101252048	clinigen
CIB2	chr15	78104606	78131535	clinigen
CIC	chr19	42268537	42295797	clinigen
CIDEC	chr3	9866711	9880255	clinigen
CIITA	chr16	10866222	10943021	clinigen
CISD2	chr4	102868974	102892807	clinigen
CITED2	chr6	139371807	139374648	clinigen
CLASP1	chr2	121337776	121649476	clinigen
CLCF1	chr11	67364168	67374177	clinigen
CLCN2	chr3	184346185	184361650	clinigen
CLCN4	chrX	10156975	10237660	clinigen
CLCN5	chrX	49922596	50099235	clinigen
CLCNKA	chr1	16018875	16034050	clinigen
CLCNKB	chr1	16040252	16057311	clinigen
CLDN14	chr21	36460621	36576569	clinigen
CLIC2	chrX	155276211	155334657	clinigen
CLMP	chr11	123069872	123195248	clinigen
CLN3	chr16	28474111	28495575	clinigen
CLN5	chr13	76990660	77019143	clinigen
CLN6	chr15	68206992	68257211	clinigen
CLN8	chr8	1755778	1801711	clinigen
CLNK	chr4	10486395	10684768	clinigen
CLPB	chr11	72285495	72434680	clinigen
CLPP	chr19	6361531	6370242	clinigen
CLRN1	chr3	150926163	150972727	clinigen
CLTC	chr17	59619680	59696956	clinigen
CNGA1	chr4	47935977	48016681	clinigen,cogiv
CNGA3	chr2	98346188	98398601	clinigen
CNGB1	chr16	57882340	57971128	clinigen
CNGB3	chr8	86553977	86743675	clinigen
CNKSR2	chrX	21372801	21654695	clinigen
CNNM4	chr2	96760902	96811874	clinigen
CNOT1	chr16	58519951	58629885	clinigen
CNOT2	chr12	70243002	70354993	clinigen
CNOT3	chr19	54137749	54155681	clinigen
CNTN1	chr12	40692439	41072415	clinigen
CNTN2	chr1	205042937	205078289	clinigen
CNTN4	chr3	2098813	3057959	clinigen
CNTN6	chr3	1092658	1404217	clinigen
CNTNAP2	chr7	146116002	148420998	clinigen
COA3	chr17	42795147	42798704	clinigen
COCH	chr14	30874514	30895065	clinigen
COG1	chr17	73193055	73208507	clinigen
COG4	chr16	70480568	70523560	clinigen
COG7	chr16	23388493	23453189	clinigen
COG8	chr16	69320140	69339583	clinigen
COL11A1	chr1	102876467	103108872	clinigen
COL11A2	chr6	33162681	33192499	clinigen
COL16A1	chr1	31652263	31704319	clinigen
COL18A1	chr21	45405165	45513720	clinigen
COL1A1	chr17	50184101	50201632	clinigen
COL1A2	chr7	94394895	94431227	clinigen
COL22A1	chr8	138588235	138914041	clinigen
COL2A1	chr12	47972967	48004554	clinigen
COL3A1	chr2	188974373	189012746	clinigen
COL4A3	chr2	227164624	227314792	clinigen
COL4A4	chr2	227002714	227164453	clinigen
COL4A5	chrX	108439838	108697545	clinigen
COL4A6	chrX	108155607	108439497	clinigen
COL5A1	chr9	134641803	134844843	clinigen
COL5A2	chr2	189031898	189225312	clinigen
COL6A1	chr21	45981770	46005050	clinigen
COL6A2	chr21	46098112	46132848	clinigen
COL6A3	chr2	237324003	237414328	clinigen
COL6A5	chr3	130345516	130484846	clinigen
COL7A1	chr3	48564073	48595329	clinigen,tcga,cogiv
COL9A1	chr6	70216040	70303084	clinigen
COL9A2	chr1	40300489	40317813	clinigen
COLEC11	chr2	3594832	3644644	clinigen
COLQ	chr3	15450133	15521751	clinigen
COMP	chr19	18782773	18791305	clinigen
COMT	chr22	19941371	19969975	clinigen
COQ2	chr4	83261536	83284914	clinigen
COQ4	chr9	128322544	128334072	clinigen,cogiv
COQ9	chr16	57447425	57461270	clinigen
CORO1A	chr16	30182827	30189076	clinigen
COX10	chr17	14069490	14231736	clinigen
COX14	chr12	50112082	50120457	clinigen
COX15	chr10	99710868	99732127	clinigen
COX20	chr1	244835616	244845057	clinigen
COX4I1	chr16	85798633	85807068	clinigen
COX6B1	chr19	35648323	35658782	clinigen
COX8A	chr11	63974620	63976543	clinigen
CP	chr3	149162410	149221829	clinigen
CPA4	chr7	130293134	130324180	clinigen
CPA6	chr8	67422038	67746378	clinigen
CPAMD8	chr19	16892951	17026815	clinigen
CPLANE1	chr5	37106228	37249376	clinigen
CPN1	chr10	100042193	100081869	clinigen
CPOX	chr3	98579446	98593648	clinigen
CPS1	chr2	210477682	210679107	clinigen
CPT1A	chr11	68754620	68844410	clinigen
CPT1B	chr22	50568861	50578465	clinigen
CPT1C	chr19	49690898	49713731	clinigen
CPT2	chr1	53196792	53214197	clinigen
CR2	chr1	207453024	207489895	clinigen
CRADD	chr12	93677375	93894840	clinigen
CRB1	chr1	197268204	197478455	NA,cogiv
CRB2	chr9	123356170	123380324	clinigen
CRBN	chr3	3144628	3179727	clinigen
CREBBP	chr16	3725054	3880713	clinigen
CRELD1	chr3	9933793	9945413	clinigen
CRH	chr8	66176376	66178464	clinigen
CRHR1	chr17	45784277	45835828	clinigen
CRHR2	chr7	30651942	30700129	clinigen
CRIPT	chr2	46616416	46630176	clinigen
CRIPTO	chr3	46574534	46582457	clinigen
CRKL	chr22	20917407	20953747	clinigen
CRPPA	chr7	16087525	16502504	clinigen
CRTAP	chr3	33114014	33147773	clinigen
CRYBA1	chr17	29246859	29254494	clinigen
CRYBB2	chr22	25212564	25231870	clinigen
CRYGC	chr2	208128137	208129828	clinigen
CRYM	chr16	21238874	21303083	clinigen
CSF1R	chr5	150053291	150113372	NA,cogiv
CSF2RA	chrX	1268800	1310381	clinigen
CSF2RB	chr22	36913628	36940439	clinigen
CSMD1	chr8	2935353	4994972	clinigen
CSNK2A1	chr20	472498	543835	clinigen
CSNK2B	chr6	31665227	31670343	clinigen
CSPP1	chr8	67062417	67196778	clinigen
CSRP3	chr11	19182030	19210571	clinigen
CSTB	chr21	43772511	43776330	clinigen
CTC1	chr17	8224815	8248058	clinigen
CTCF	chr16	67562467	67639177	clinigen
CTDP1	chr18	79679803	79754503	clinigen
CTF1	chr16	30896614	30903547	clinigen
CTH	chr1	70411218	70439851	clinigen
CTLA4	chr2	203853888	203873965	clinigen
CTNNA1	chr5	138610967	138935034	clinigen
CTNNA3	chr10	65912457	67763637	clinigen
CTNNB1	chr3	41194741	41260096	clinigen,cogiv
CTNNBL1	chr20	37694030	37872129	clinigen
CTNND2	chr5	10971836	11904446	clinigen
CTNS	chr17	3636459	3663103	clinigen
CTR9	chr11	10751018	10801625	NA,tcga,cogiv
CTSA	chr20	45890144	45898949	clinigen
CTSB	chr8	11842524	11869533	clinigen
CTSD	chr11	1752752	1764573	clinigen
CTSF	chr11	66563464	66568879	clinigen
CTSK	chr1	150794880	150809577	clinigen
CUBN	chr10	16823966	17129811	clinigen
CUL3	chr2	224470150	224585397	clinigen
CUL4B	chrX	120505920	120604074	clinigen
CUL7	chr6	43037617	43053943	NA,cogiv
CUX2	chr12	111034165	111350554	clinigen
CXCR4	chr2	136114349	136119177	clinigen
CYB5A	chr18	74250846	74291973	clinigen
CYB5R1	chr1	202961873	202967275	clinigen
CYB5R2	chr11	7665100	7677222	clinigen
CYB5R3	chr22	42615730	42720870	clinigen
CYB5R4	chr6	83859656	83967423	clinigen
CYBB	chrX	37780018	37813461	clinigen
CYC1	chr8	144095039	144097525	clinigen
CYCS	chr7	25118656	25125260	clinigen
CYLD	chr16	50742050	50801935	clinigen,tcga,cogiv
CYP21A2	chr6	32038327	32041644	clinigen
CYP24A1	chr20	54153446	54173986	clinigen
CYP27A1	chr2	218781749	218815293	clinigen,cogiv
CYP2A6	chr19	40843541	40850447	clinigen
CYP2B6	chr19	40991282	41018398	clinigen
CYP2C19	chr10	94762681	94855547	clinigen
CYP2C8	chr10	95036772	95069497	clinigen
CYP2C9	chr10	94938658	94990091	clinigen
CYP2D6	chr22	42126499	42130865	clinigen
CYP2U1	chr4	107931549	107953461	clinigen
CYP3A4	chr7	99756960	99784248	clinigen
CYP3A43	chr7	99828013	99866093	clinigen
CYP3A5	chr7	99648194	99679996	clinigen
CYP4F2	chr19	15878023	15898077	clinigen
CYP4F22	chr19	15508525	15552317	clinigen
CYP4V2	chr4	186191567	186213463	clinigen
CYS1	chr2	10056473	10080944	clinigen
D2HGDH	chr2	241734602	241768816	clinigen
DAO	chr12	108858932	108901043	clinigen
DARS2	chr1	173824653	173858808	clinigen
DAZ1	chrY	23129355	23199010	clinigen
DBH	chr9	133636363	133659329	clinigen
DBT	chr1	100186919	100249834	clinigen
DCAF17	chr2	171434217	171485052	clinigen
DCC	chr18	52340197	53535899	clinigen
DCDC2	chr6	24171755	24358059	clinigen
DCHS1	chr11	6621330	6655809	clinigen
DCLRE1C	chr10	14897359	14954432	clinigen
DCX	chrX	111293779	111412429	clinigen
DCXR	chr17	82035136	82037709	clinigen
DDB2	chr11	47214465	47239217	clinigen,tcga,cogiv
DDC	chr7	50458436	50565405	clinigen
DDHD1	chr14	53036745	53153323	clinigen
DDOST	chr1	20651767	20661544	clinigen
DDR2	chr1	162631373	162787405	clinigen
DDX3X	chrX	41333348	41364472	clinigen
DDX41	chr5	177511577	177516961	clinigen
DECR1	chr8	90001405	90053633	clinigen
DEPDC5	chr22	31753867	31908033	clinigen
DES	chr2	219418377	219426735	clinigen
DGKE	chr17	56834107	56869567	clinigen
DGUOK	chr2	73926826	73958961	clinigen
DHCR7	chr11	71428193	71452868	clinigen
DHODH	chr16	72008588	72027664	clinigen
DHTKD1	chr10	12068954	12123221	clinigen
DHX57	chr2	38797729	38875934	clinigen
DIABLO	chr12	122207668	122226062	clinigen
DIAPH1	chr5	141515016	141619055	clinigen
DIAPH3	chr13	59665583	60163928	clinigen
DICER1	chr14	95086228	95158010	clinigen,tcga,cogiv
DIP2A	chr21	46458891	46570015	clinigen
DIRAS3	chr1	68045886	68051717	clinigen
DIS3L2	chr2	231961245	232344350	clinigen,tcga
DISC1	chr1	231626790	232041272	clinigen
DISP1	chr1	222815022	223005995	clinigen
DKC1	chrX	154762742	154777689	clinigen,tcga,cogiv
DLAT	chr11	112025033	112064404	clinigen
DLD	chr7	107891162	107931730	clinigen
DLG2	chr11	83455012	85628335	clinigen
DLG3	chrX	70444835	70505490	clinigen
DLG4	chr17	7187187	7219836	clinigen
DLGAP2	chr8	737628	1708476	clinigen
DLK1	chr14	100725705	100738224	clinigen
DLL1	chr6	170282206	170306565	clinigen
DLX1	chr2	172084740	172089677	clinigen
DLX2	chr2	172099438	172102900	clinigen
DLX5	chr7	97020396	97024950	clinigen
DLX6	chr7	97005553	97011040	clinigen
DMD	chrX	31097677	33339609	clinigen
DMGDH	chr5	78997564	79236038	clinigen
DMP1	chr4	87650280	87664361	clinigen
DMRT1	chr9	841690	969090	clinigen
DMRT2	chr9	1049858	1057552	clinigen
DMXL2	chr15	51447711	51622833	clinigen
DNAAF1	chr16	84145287	84178767	clinigen
DNAAF11	chr8	132570416	132675592	clinigen
DNAAF3	chr19	55158661	55166722	clinigen
DNAH1	chr3	52316319	52400492	clinigen
DNAH11	chr7	21543039	21901839	clinigen
DNAH17	chr17	78423697	78577396	clinigen
DNAH5	chr5	13690328	14011818	clinigen,cogiv
DNAH8	chr6	38715311	39030792	clinigen
DNAI1	chr9	34457414	34520988	clinigen
DNAI2	chr17	74274234	74314884	clinigen
DNAJB11	chr3	186567403	186585800	clinigen
DNAJB2	chr2	219279342	219286898	clinigen
DNAJB6	chr7	157335381	157417439	clinigen
DNAJC12	chr10	67796669	67838188	clinigen
DNAJC19	chr3	180983697	180989774	clinigen
DNAJC21	chr5	34929559	34958964	clinigen
DNAJC28	chr21	33488055	33491716	clinigen
DNAJC5	chr20	63895126	63936031	clinigen
DNAJC6	chr1	65248219	65415871	clinigen
DNAJC7	chr17	41976421	42021376	clinigen
DNASE1	chr16	3611728	3680143	clinigen
DNM1	chr9	128191655	128255248	clinigen
DNM1L	chr12	32679200	32745650	clinigen
DNM2	chr19	10718055	10833488	clinigen
DNMT1	chr19	10133342	10231286	clinigen
DNMT3A	chr2	25227855	25342590	clinigen,cogiv
DNMT3B	chr20	32762385	32809359	clinigen
DOCK2	chr5	169637268	170083382	clinigen
DOCK6	chr19	11199295	11262524	clinigen
DOCK7	chr1	62454298	62688386	clinigen
DOCK8	chr9	214854	465259	clinigen,tcga,cogiv
DOK7	chr4	3463306	3501473	clinigen
DPAGT1	chr11	119096025	119108331	clinigen
DPM1	chr20	50934867	50959140	clinigen
DPM3	chr1	155139891	155140595	clinigen
DPP6	chr7	153748133	154894285	clinigen
DPYD	chr1	97077743	97995000	clinigen
DPYS	chr8	104330324	104467055	clinigen
DRD2	chr11	113409605	113475691	clinigen
DRD5	chr4	9781634	9784009	clinigen
DROSHA	chr5	31400494	31532196	NA,tcga
DSC2	chr18	31058545	31102600	clinigen
DSC3	chr18	30989365	31042815	clinigen
DSCAM	chr21	40010999	40847158	clinigen
DSE	chr6	116254173	116444861	clinigen
DSG2	chr18	31497624	31551351	clinigen
DSG4	chr18	31376777	31414912	clinigen,cogiv
DSP	chr6	7541326	7586717	clinigen,cogiv
DSPP	chr4	87608529	87616873	clinigen
DST	chr6	56457987	56954830	clinigen
DSTYK	chr1	205142505	205211702	clinigen
DTNA	chr18	34493291	34891844	clinigen
DTNBP1	chr6	15522807	15663058	clinigen
DYM	chr18	49036387	49461347	clinigen
DYNC1H1	chr14	101964573	102056443	clinigen
DYNC2H1	chr11	103109410	103479863	clinigen
DYNC2I1	chr7	158856558	158956747	clinigen
DYRK1A	chr21	37365573	37526358	clinigen
DYSF	chr2	71453561	71686763	clinigen,cogiv
DZIP1L	chr3	138061990	138115818	clinigen
EARS2	chr16	23520754	23557731	clinigen
EBF3	chr10	129835233	129973053	clinigen
EBP	chrX	48521799	48528716	clinigen
ECHS1	chr10	133362485	133373354	clinigen,cogiv
EDA	chrX	69616067	70039472	clinigen
EDN3	chr20	59300443	59325992	clinigen
EDNRB	chr13	77895481	77975529	clinigen
EED	chr11	86201212	86278813	clinigen
EEF1A2	chr20	63488013	63499239	clinigen
EFCAB13	chr17	47323290	47441312	clinigen
EFEMP1	chr2	55865967	55924139	clinigen
EFEMP2	chr11	65866441	65873592	clinigen
EFL1	chr15	82130206	82262773	clinigen
EFNB1	chrX	68829021	68842160	clinigen
EFTUD2	chr17	44849948	44899445	clinigen
EGF	chr4	109912883	110013766	clinigen
EGFR	chr7	55019017	55211628	clinigen,tcga
EGR2	chr10	62811996	62819167	clinigen
EHHADH	chr3	185190624	185281990	clinigen
EHMT1	chr9	137618992	137870016	clinigen
EIF2AK3	chr2	88556741	88691518	clinigen
EIF2AK4	chr15	39934115	40035591	clinigen
EIF2B1	chr12	123620406	123633766	clinigen
EIF2B3	chr1	44850522	44986722	clinigen
EIF2S3	chrX	24054946	24078810	clinigen
EIF4A3	chr17	80134369	80147151	clinigen
ELANE	chr19	851014	856247	clinigen,tcga
ELAVL2	chr9	23690104	23826337	clinigen
ELK1	chrX	47635521	47650604	clinigen
ELMOD3	chr2	85354394	85391752	clinigen
ELN	chr7	74027789	74069907	clinigen
ELOA3P	chr18	47028202	47029842	clinigen
ELOVL4	chr6	79914814	79947553	clinigen
EMC1	chr1	19215660	19251552	clinigen
EMD	chrX	154379273	154381574	clinigen
EMX2	chr10	117542445	117549546	clinigen
EN2	chr7	155458129	155464831	clinigen
ENG	chr9	127811130	127854773	clinigen
ENO3	chr17	4948092	4957131	clinigen
ENPP1	chr6	131808016	131895155	clinigen
ENTPD1	chr10	95711779	95877266	clinigen
EP300	chr22	41092510	41180077	clinigen
EPAS1	chr2	46293667	46386697	clinigen
EPB41L1	chr20	36091504	36232799	clinigen
EPB42	chr15	43197227	43221018	clinigen
EPCAM	chr2	47345158	47387601	clinigen,tcga,cogiv
EPHB4	chr7	100802565	100827523	clinigen
EPHX1	chr1	225810124	225845563	clinigen
EPM2A	chr6	145382535	145736023	clinigen
EPS8	chr12	15620134	15882329	clinigen
EPS8L2	chr11	694438	727727	clinigen
ERBB3	chr12	56076799	56103505	NA,cogiv
ERBB4	chr2	211375717	212538841	clinigen,cogiv
ERCC1	chr19	45407334	45478828	clinigen,tcga
ERCC2	chr19	45349837	45370918	clinigen,tcga
ERCC3	chr2	127257290	127294166	clinigen,tcga,cogiv
ERCC4	chr16	13920138	13952348	clinigen,tcga,cogiv
ERCC5	chr13	102845831	102875995	clinigen,tcga
ERCC6	chr10	49454168	49539538	clinigen
ERCC6L2	chr9	95871264	96121154	clinigen
ERCC8	chr5	60866454	60945073	clinigen
ERF	chr19	42247569	42255128	clinigen
ERLIN1	chr10	100150094	100186033	clinigen
ERMARD	chr6	169751622	169781600	clinigen
ESCO2	chr8	27771949	27812640	clinigen
ESPN	chr1	6424776	6461367	clinigen
ESRRB	chr14	76310712	76501837	clinigen
ETFA	chr15	76188555	76311730	clinigen
ETFB	chr19	51345169	51366388	clinigen
ETFDH	chr4	158671968	158710742	clinigen
ETHE1	chr19	43506719	43527230	clinigen
ETV6	chr12	11649674	11895377	clinigen,tcga
EVC2	chr4	5542772	5709548	clinigen
EVX2	chr2	176077472	176083962	clinigen
EWSR1	chr22	29268009	29300525	clinigen
EXO1	chr1	241847967	241895148	clinigen
EXO5	chr1	40508741	40516038	clinigen
EXOC2	chr6	485154	693139	clinigen
EXOC7	chr17	76081016	76121576	clinigen
EXOSC3	chr9	37759234	37832117	clinigen
EXPH5	chr11	108505435	108593768	clinigen
EXT1	chr8	117794490	118111826	clinigen,tcga,cogiv
EXT2	chr11	44095648	44251962	clinigen,tcga,cogiv
EYA1	chr8	71197433	71592025	clinigen
EYA4	chr6	133240514	133532128	clinigen
EYS	chr6	63719980	65707226	clinigen,cogiv
EZH2	chr7	148807257	148884321	clinigen
F10	chr13	113122799	113149529	clinigen
F11	chr4	186266189	186289681	clinigen
F12	chr5	177402133	177416583	clinigen
F13A1	chr6	6144084	6321013	clinigen
F13B	chr1	197038741	197067260	clinigen
F2	chr11	46719196	46739506	clinigen
F5	chr1	169511951	169586588	clinigen
F7	chr13	113105788	113120685	clinigen
F8	chrX	154835788	155026940	clinigen
F9	chrX	139530739	139563459	clinigen
FA2H	chr16	74712955	74774831	clinigen
FADD	chr11	70203296	70207390	clinigen
FAH	chr15	80152490	80186946	clinigen,tcga,cogiv
FAM161A	chr2	61824848	61854143	clinigen
FAM20C	chr7	192571	260772	clinigen
FAN1	chr15	30890559	30943108	clinigen
FANCA	chr16	89726683	89816977	clinigen,tcga,cogiv
FANCB	chrX	14690388	14873255	clinigen
FANCC	chr9	95099054	95426796	clinigen,tcga,cogiv
FANCD2	chr3	10026370	10101932	clinigen,tcga
FANCE	chr6	35452338	35467104	clinigen,tcga,cogiv
FANCF	chr11	22622533	22625823	clinigen,tcga
FANCG	chr9	35073835	35080004	clinigen,tcga,cogiv
FANCI	chr15	89243945	89317261	clinigen,tcga,cogiv
FANCL	chr2	58159243	58241410	clinigen,tcga
FANCM	chr14	45135930	45200890	NA,tcga,cogiv
FAR1	chr11	13668659	13732346	clinigen
FARS2	chr6	5261044	5829192	clinigen,cogiv
FAS	chr10	88953813	89029605	clinigen
FASLG	chr1	172659103	172666876	clinigen
FASTKD2	chr2	206765357	206796189	clinigen
FBLN2	chr3	13549125	13638422	clinigen
FBN1	chr15	48408313	48645721	clinigen
FBN2	chr5	128257909	128659185	clinigen
FBP1	chr9	94603133	94640249	clinigen,cogiv
FBXL4	chr6	98868535	98948006	clinigen
FBXO38	chr5	148383935	148442836	clinigen
FBXO7	chr22	32474676	32498829	clinigen
FBXW11	chr5	171861549	172006873	clinigen
FBXW4	chr10	101610664	101695295	clinigen
FCGR3A	chr1	161541759	161550968	clinigen
FCHO1	chr19	17747718	17788568	clinigen
FDPS	chr1	155308748	155320666	clinigen
FECH	chr18	57544377	57586732	clinigen
FERMT3	chr11	64205926	64223896	clinigen
FGA	chr4	154583126	154590742	clinigen
FGB	chr4	154563011	154572807	clinigen
FGD1	chrX	54445454	54496234	clinigen
FGD4	chr12	32399558	32646050	clinigen
FGF10	chr5	44300247	44389706	clinigen
FGF12	chr3	192139390	192767764	clinigen
FGF23	chr12	4368227	4379712	clinigen
FGF3	chr11	69809968	69819416	clinigen
FGFR1	chr8	38400215	38468834	clinigen
FGFR2	chr10	121478332	121598458	clinigen
FGFR3	chr4	1793293	1808872	clinigen
FGFRL1	chr4	1009936	1026898	clinigen
FGG	chr4	154604134	154612967	clinigen
FH	chr1	241497511	241519799	clinigen,tcga,cogiv
FHIT	chr3	59747277	61251459	clinigen
FHL1	chrX	136146702	136211359	clinigen
FIG4	chr6	109690609	109878098	clinigen
FITM2	chr20	44302840	44311202	clinigen
FKBP14	chr7	30010587	30026702	clinigen
FKBP5	chr6	35573585	35728583	clinigen
FKRP	chr19	46746046	46776988	clinigen
FKTN	chr9	105558122	105653820	clinigen
FLAD1	chr1	154983338	154993111	clinigen
FLCN	chr17	17212212	17237188	clinigen,tcga
FLG	chr1	152302165	152325239	clinigen
FLI1	chr11	128686535	128813267	clinigen
FLNA	chrX	154348524	154374634	clinigen
FLNB	chr3	58008398	58172251	clinigen
FLNC	chr7	128830406	128859274	clinigen
FLT4	chr5	180601506	180649624	clinigen
FLVCR1	chr1	212858275	212899363	clinigen
FLVCR2	chr14	75578620	75663214	clinigen
FMO2	chr1	171185249	171212686	clinigen
FMO3	chr1	171090901	171117819	clinigen
FMR1	chrX	147911919	147951125	clinigen
FNIP1	chr5	131641714	131797017	clinigen
FOLR1	chr11	72189558	72196323	clinigen
FOXA2	chr20	22580998	22585455	clinigen
FOXC1	chr6	1609915	1613897	clinigen
FOXC2	chr16	86566829	86569728	clinigen
FOXD3	chr1	63322567	63325128	clinigen
FOXE1	chr9	97853226	97856717	clinigen
FOXE3	chr1	47416285	47418052	clinigen
FOXF1	chr16	86510527	86515422	clinigen
FOXG1	chr14	28764329	28770277	clinigen
FOXI1	chr5	170105897	170109734	clinigen
FOXJ1	chr17	76136333	76141245	clinigen
FOXL2	chr3	138944224	138947137	clinigen
FOXN1	chr17	28506243	28538900	clinigen
FOXP1	chr3	70954693	71583978	clinigen
FOXP2	chr7	114086327	114693772	clinigen
FOXRED1	chr11	126269024	126278131	clinigen
FRAS1	chr4	78057323	78544269	clinigen
FREM1	chr9	14737152	14910995	clinigen
FRMD7	chrX	132076990	132128020	clinigen
FRMPD4	chrX	11822423	12724523	clinigen
FSHB	chr11	30231014	30235261	clinigen
FTCD	chr21	46136160	46155579	clinigen
FTL	chr19	48965309	48966879	clinigen
FTSJ1	chrX	48476021	48486364	clinigen
FUCA1	chr1	23845077	23868290	clinigen
FUS	chr16	31180138	31196963	clinigen,cogiv
FXN	chr9	69035751	69079076	clinigen
FXYD2	chr11	117800844	117828698	clinigen
FYB1	chr5	39105252	39274528	clinigen
FYCO1	chr3	45917903	45995824	clinigen
FZD4	chr11	86945679	86955395	clinigen
G6PC3	chr17	44070620	44082151	clinigen
G6PD	chrX	154517825	154547572	clinigen
GAA	chr17	80101533	80119881	clinigen,cogiv
GAB4	chr22	16961936	17008222	clinigen
GABRA1	chr5	161847063	161899981	clinigen
GABRB3	chr15	26543552	26939539	clinigen
GABRD	chr1	2019329	2030758	clinigen
GABRG2	chr5	162000057	162162977	clinigen
GAD1	chr2	170813213	170861151	clinigen
GALC	chr14	87837820	87993665	clinigen
GALK1	chr17	75751594	75765236	clinigen
GALNS	chr16	88813734	88856970	clinigen
GALNT12	chr9	98807670	98850081	clinigen
GALNT3	chr2	165747588	165846201	clinigen,tcga,cogiv
GALR1	chr18	77249848	77277900	clinigen
GALT	chr9	34638133	34651035	clinigen,cogiv
GAMT	chr19	1397026	1401570	clinigen
GAN	chr16	81314944	81390809	clinigen
GANAB	chr11	62624826	62646726	clinigen
GARS1	chr7	30580533	30634033	clinigen
GAS1	chr9	86944362	86947506	clinigen
GAS2L2	chr17	35744511	35753239	clinigen
GATA1	chrX	48786540	48794311	clinigen
GATA2	chr3	128479427	128493201	clinigen,tcga
GATA3	chr10	8045378	8075198	clinigen
GATA4	chr8	11676959	11760002	clinigen
GATA6	chr18	22169589	22202528	clinigen
GATAD1	chr7	92447482	92460075	clinigen
GATAD2B	chr1	153789030	153923360	clinigen
GATM	chr15	45361124	45402327	clinigen
GBA1	chr1	155234452	155244699	clinigen
GBA2	chr9	35736866	35749228	clinigen,cogiv
GBE1	chr3	81489703	81761645	clinigen
GCDH	chr19	12891128	12915126	clinigen
GCH1	chr14	54842008	54902826	clinigen
GCK	chr7	44143213	44198170	clinigen
GCSH	chr16	81081945	81096395	clinigen
GDAP1	chr8	74320613	74518007	clinigen
GDF2	chr10	47322454	47327588	clinigen
GDF5	chr20	35433347	35454746	clinigen
GDI1	chrX	154436913	154443467	clinigen
GEN1	chr2	17753858	17788946	clinigen
GFER	chr16	1984193	1987749	clinigen
GFI1B	chr9	132944000	132991687	clinigen
GFM1	chr3	158644527	158695581	clinigen
GFM2	chr5	74721206	74767147	clinigen
GGCX	chr2	85544720	85561532	clinigen
GIGYF2	chr2	232697299	232860605	clinigen
GIPC3	chr19	3585478	3593541	clinigen
GJA1	chr6	121435595	121449727	clinigen
GJA5	chr1	147756199	147773362	clinigen
GJA8	chr1	147902795	147909269	clinigen
GJB1	chrX	71212811	71225516	clinigen
GJB2	chr13	20187463	20192938	clinigen,tcga,cogiv
GJB3	chr1	34781214	34786369	clinigen
GJB6	chr13	20221962	20232365	clinigen
GK	chrX	30653359	30731462	clinigen
GLA	chrX	101393273	101408012	clinigen,cogiv
GLB1	chr3	32996609	33097202	clinigen
GLDC	chr9	6532467	6645729	clinigen,cogiv
GLI2	chr2	120735623	120992653	clinigen
GLI3	chr7	41960949	42264100	clinigen
GLIS2	chr16	4314761	4339597	clinigen
GLIS3	chr9	3824127	4348392	clinigen
GLMN	chr1	92246402	92298987	clinigen
GLRB	chr4	157076125	157172090	clinigen
GLS	chr2	190880821	190965552	clinigen
GLT8D1	chr3	52694486	52706032	clinigen
GLUD1	chr10	87050202	87094843	clinigen
GLUL	chr1	182378098	182392206	clinigen
GM2A	chr5	151212150	151270440	clinigen
GMPPA	chr2	219498865	219513898	clinigen
GMPPB	chr3	49716844	49723973	clinigen
GNAI1	chr7	79768028	80226181	clinigen
GNAI3	chr1	109548615	109600195	clinigen
GNAO1	chr16	56189660	56357444	clinigen
GNAS	chr20	58839718	58911192	clinigen
GNAT2	chr1	109603091	109619929	clinigen
GNB1	chr1	1785285	1892292	clinigen
GNB3	chr12	6839954	6847393	clinigen
GNB4	chr3	179396088	179451476	clinigen
GNE	chr9	36214441	36277042	clinigen
GNMT	chr6	42960754	42963880	clinigen
GNPAT	chr1	231241207	231277973	clinigen
GNPTAB	chr12	101745499	101830959	clinigen
GNPTG	chr16	1351931	1365737	clinigen
GNRH1	chr8	25419258	25424654	clinigen
GNS	chr12	64713445	64759431	clinigen
GORAB	chr1	170531819	170553834	clinigen
GP1BA	chr17	4932277	4935023	clinigen
GP1BB	chr22	19723539	19724771	clinigen
GP6	chr19	55013705	55038264	clinigen
GP9	chr3	129060779	129062406	clinigen
GPAA1	chr8	144082337	144093149	clinigen
GPC3	chrX	133535745	133987100	clinigen,tcga
GPC5	chr13	91398621	92873682	clinigen
GPC6	chr13	93226807	94408020	clinigen
GPD1	chr12	50103982	50111313	clinigen
GPD1L	chr3	32105689	32168709	clinigen
GPHN	chr14	66507407	67181803	clinigen
GPIHBP1	chr8	143213218	143217170	clinigen
GPR143	chrX	9725346	9786297	clinigen
GPR148	chr2	130729070	130730336	clinigen
GPR179	chr17	38324571	38343956	clinigen
GPSM2	chr1	108875350	108934545	clinigen
GPT2	chr16	46884362	46931289	clinigen
GPX4	chr19	1103982	1106791	clinigen
GRB10	chr7	50590063	50793462	clinigen
GREM1	chr15	32718004	32745106	clinigen
GRHL2	chr8	101492439	101669726	clinigen
GRHPR	chr9	37422666	37436990	clinigen
GRIA2	chr4	157204182	157387146	clinigen
GRIA3	chrX	123184153	123490915	clinigen
GRID1	chr10	85599552	86366795	clinigen
GRIK2	chr6	100962701	102081622	clinigen
GRIK4	chr11	120511746	120988906	clinigen
GRIN1	chr9	137138346	137168756	clinigen
GRIN2A	chr16	9753404	10182928	clinigen
GRIN2B	chr12	13437942	13982002	clinigen
GRIN2D	chr19	48393668	48444931	clinigen
GRIN3B	chr19	1000419	1009732	clinigen
GRIP1	chr12	66347431	67069162	clinigen
GRK1	chr13	113667219	113737736	clinigen
GRK5	chr10	119207571	119459745	clinigen
GRM1	chr6	146027646	146437601	clinigen
GRM6	chr5	178977587	178996206	clinigen
GRN	chr17	44345246	44353106	clinigen
GRXCR1	chr4	42892713	43030658	clinigen
GRXCR2	chr5	145858521	145937126	clinigen
GSDME	chr7	24698355	24757940	clinigen
GSS	chr20	34928432	34956027	clinigen
GSTM1	chr1	109687814	109709039	clinigen
GSTP1	chr11	67583742	67586656	clinigen
GSTZ1	chr14	77320996	77331597	clinigen
GSX2	chr4	54099523	54102498	clinigen
GTF2H5	chr6	158168350	158199344	clinigen
GTF2I	chr7	74650231	74760692	clinigen
GTF2IRD1	chr7	74453790	74602605	clinigen
GTF2IRD2	chr7	74796151	74851605	clinigen
GTPBP3	chr19	17334920	17342731	clinigen
GUCA1C	chr3	108907792	108953879	clinigen
GUCY2C	chr12	14612632	14696599	clinigen
GUCY2D	chr17	8002615	8020342	clinigen
GUSB	chr7	65960684	65982215	clinigen
GYG1	chr3	148991408	149031775	clinigen
GYS2	chr12	21536107	21604847	clinigen
H1-4	chr6	26156329	26157115	clinigen
H19	chr11	1995166	2004552	clinigen
H6PD	chr1	9234774	9271337	clinigen
HAAO	chr2	42767089	42792593	clinigen
HACD1	chr10	17589032	17617374	clinigen
HADH	chr4	107989714	108035241	clinigen
HADHA	chr2	26190635	26244672	clinigen
HADHB	chr2	26243170	26290465	clinigen
HAL	chr12	95972662	95996365	clinigen
HAND1	chr5	154474972	154478227	clinigen
HARS1	chr5	140673035	140691537	clinigen
HARS2	chr5	140691430	140699305	clinigen
HAS3	chr16	69105653	69118719	clinigen
HBA1	chr16	176680	177522	clinigen
HBA2	chr16	172876	173710	clinigen
HBB	chr11	5225464	5229395	clinigen
HCCS	chrX	11111301	11123086	clinigen
HCFC1	chrX	153947557	153971818	clinigen
HCN1	chr5	45254948	45696498	clinigen
HCN4	chr15	73319859	73368958	clinigen,cogiv
HDAC4	chr2	239048168	239401654	clinigen
HDAC8	chrX	72329516	72573101	clinigen
HELLS	chr10	94545329	94613905	clinigen
HEPACAM	chr11	124919205	124936412	clinigen
HEXA	chr15	72340924	72376420	clinigen
HEXB	chr5	74640023	74722647	clinigen
HFE	chr6	26087226	26098343	clinigen,tcga,cogiv
HFM1	chr1	91260766	91404856	clinigen
HGD	chr3	120628172	120682269	clinigen
HGF	chr7	81699010	81770438	clinigen
HGSNAT	chr8	43140464	43202855	clinigen
HIBADH	chr7	27525442	27662883	clinigen
HIBCH	chr2	190189735	190344193	clinigen
HINT1	chr5	131155383	131224468	clinigen
HIRA	chr22	19330698	19447450	clinigen
HIVEP2	chr6	142751469	142956698	clinigen
HIVEP3	chr1	41506365	42035925	clinigen
HJV	chr1	146017468	146036746	clinigen
HLA-A	chr6	29941260	29949572	clinigen
HLA-B	chr6	31353872	31367067	clinigen
HLA-C	chr6	31268749	31272130	clinigen
HLA-DPB1	chr6	33075936	33089696	clinigen
HLA-DQA1	chr6	32628179	32647062	clinigen
HLA-DRB1	chr6	32577902	32589848	clinigen
HLCS	chr21	36748626	36990236	clinigen
HMBS	chr11	119084866	119093834	clinigen,tcga
HMGA2	chr12	65824460	65966291	clinigen
HMGCL	chr1	23801885	23838620	clinigen
HMGCR	chr5	75336329	75364001	clinigen
HMGCS2	chr1	119748002	119768905	clinigen
HMX1	chr4	8846076	8871839	clinigen
HNF1A	chr12	120978543	121002512	clinigen,tcga,cogiv
HNF1B	chr17	37686431	37745059	clinigen
HNF4A	chr20	44355699	44432845	clinigen
HNRNPA2B1	chr7	26171151	26201529	clinigen
HNRNPDL	chr4	82422565	82430462	clinigen
HNRNPK	chr9	83968083	83980631	clinigen
HNRNPR	chr1	23303771	23344336	clinigen
HNRNPU	chr1	244840638	244864560	clinigen
HOMER2	chr15	82836946	82986153	clinigen
HOXA1	chr7	27092993	27096000	clinigen
HOXA11	chr7	27181157	27185232	clinigen
HOXD13	chr2	176092721	176095944	clinigen
HOXD9	chr2	176122719	176124937	clinigen
HPD	chr12	121839527	121863596	clinigen
HPDL	chr1	45326895	45328710	clinigen
HPGD	chr4	174490175	174523154	clinigen
HPRT1	chrX	134460165	134520513	clinigen
HPS1	chr10	98410939	98446963	clinigen
HPS3	chr3	149129638	149173732	clinigen
HPS4	chr22	26443107	26483931	clinigen
HPS5	chr11	18278668	18322198	clinigen
HPS6	chr10	102065349	102068036	clinigen
HPSE2	chr10	98457077	99235862	clinigen
HRAS	chr11	532242	537321	clinigen,tcga
HRG	chr3	186660216	186678234	clinigen
HSD17B10	chrX	53431258	53434370	clinigen
HSD17B13	chr4	87303789	87322886	clinigen
HSD17B3	chr9	96235306	96302176	clinigen
HSD17B4	chr5	119452465	119637199	clinigen
HSD3B7	chr16	30985207	30989147	clinigen
HSPB1	chr7	76302673	76304295	clinigen
HSPB8	chr12	119171555	119224855	clinigen
HSPG2	chr1	21822244	21937310	clinigen
HTN3	chr4	70028455	70036538	clinigen
HTR1A	chr5	63957874	63962507	clinigen
HTR2A	chr13	46831546	46897076	clinigen
HTR2C	chrX	114584078	114910061	clinigen
HTRA2	chr2	74529596	74533350	clinigen
HTT	chr4	3041363	3243957	clinigen
HUWE1	chrX	53532096	53686752	clinigen
HYAL1	chr3	50299890	50312381	clinigen
HYDIN	chr16	70802084	71230722	clinigen
HYKK	chr15	78507564	78537372	clinigen
HYLS1	chr11	125883614	125900646	clinigen
HYMAI	chr6	144004916	144008262	clinigen
IARS2	chr1	220094132	220148041	clinigen
ICOS	chr2	203936763	203961577	clinigen
ICOSLG	chr21	44215382	44241446	clinigen
IDH1	chr2	208236229	208266074	NA,cogiv
IDH2	chr15	90083045	90102477	clinigen
IDH3B	chr20	2658395	2664219	clinigen
IDS	chrX	149476988	149521096	clinigen,cogiv
IDUA	chr4	986997	1004564	clinigen
IFNL3	chr19	39243455	39245250	clinigen
IFNL4	chr19	39246314	39248856	clinigen
IFT122	chr3	129429607	129520510	clinigen
IFT140	chr16	1510427	1612072	clinigen
IFT27	chr22	36758202	36776256	clinigen
IFT43	chr14	75902136	76084585	clinigen
IGBP1	chrX	70133447	70166324	clinigen
IGF1R	chr15	98648539	98964530	clinigen
IGF2	chr11	2129112	2158391	clinigen
IGF2R	chr6	159969082	160113507	clinigen
IGHM	chr14	105851705	105856218	clinigen
IGHMBP2	chr11	68903863	68940602	clinigen
IGKC	chr2	88857161	88857683	clinigen
IGLL1	chr22	23573125	23580302	clinigen
IKBKB	chr8	42271302	42332460	clinigen
IKBKG	chrX	154541199	154565046	clinigen
IKZF1	chr7	50304068	50405101	clinigen
IKZF2	chr2	212999691	213152427	clinigen
IKZF3	chr17	39757718	39864312	clinigen
IKZF5	chr10	122990807	123008812	clinigen
IL10RA	chr11	117986370	118003037	clinigen
IL17RA	chr22	17084954	17115693	clinigen
IL1RAPL1	chrX	28587446	29956718	clinigen
IL21	chr4	122610108	122621066	clinigen
IL21R	chr16	27402174	27452042	clinigen
IL2RA	chr10	6010689	6062370	clinigen
IL2RG	chrX	71107404	71112108	clinigen
IL7R	chr5	35852695	35879603	clinigen
ILDR1	chr3	121987323	122022247	clinigen
ILK	chr11	6603708	6610874	clinigen
IMMP2L	chr7	110662644	111562517	clinigen
IMPA1	chr8	81656914	81686331	clinigen
INF2	chr14	104681146	104722535	clinigen
INO80	chr15	40978880	41116280	clinigen
INPP5E	chr9	136428619	136439845	clinigen
INS	chr11	2159779	2161221	clinigen
INSRR	chr1	156840063	156859117	NA,cogiv
INVS	chr9	100099243	100302175	clinigen
IQSEC2	chrX	53225828	53321350	clinigen
IRAK4	chr12	43758944	43798307	clinigen
IRF2BP2	chr1	234604269	234610178	clinigen
IRF6	chr1	209785617	209806175	clinigen
ITCH	chr20	34363235	34511773	clinigen
ITGA2B	chr17	44372180	44389649	clinigen
ITGA3	chr17	50055968	50090481	clinigen
ITGB2	chr21	44885953	44931989	clinigen
ITGB3	chr17	47253827	47313743	clinigen
ITGB4	chr17	75721328	75757818	NA,cogiv
ITK	chr5	157142933	157255185	clinigen,tcga
ITPA	chr20	3208868	3223870	clinigen
ITPR1	chr3	4493345	4847506	clinigen
ITSN1	chr21	33642400	33899861	clinigen
IVD	chr15	40405485	40435947	clinigen
IYD	chr6	150368892	150405969	clinigen
JAG1	chr20	10637684	10673999	clinigen
JAK3	chr19	17824780	17848071	clinigen,cogiv
JAM3	chr11	134069071	134152001	clinigen
JARID2	chr6	15246069	15522042	clinigen
JMJD1C	chr10	63167221	63521850	NA,tcga,cogiv
JPH2	chr20	44106590	44187188	clinigen
JUP	chr17	41754604	41786931	clinigen
KANK1	chr9	470291	746105	clinigen
KANSL1	chr17	46029916	46225389	clinigen
KARS1	chr16	75627474	75648643	clinigen
KAT6A	chr8	41929479	42051994	clinigen
KAT6B	chr10	74824927	75032624	clinigen
KATNAL2	chr18	46917492	47103478	clinigen
KBTBD13	chr15	65076746	65079948	clinigen
KCNA1	chr12	4909905	4918256	clinigen
KCNA2	chr1	110519837	110631474	clinigen
KCNB1	chr20	49293394	49484297	clinigen
KCNC1	chr11	17734774	17856804	clinigen
KCND3	chr1	111770662	111989668	clinigen
KCNE1	chr21	34446688	34512214	clinigen
KCNE2	chr21	34364006	34371381	clinigen
KCNE3	chr11	74454841	74467729	clinigen
KCNE5	chrX	109623700	109625172	clinigen
KCNH1	chr1	210676823	211134165	clinigen
KCNH2	chr7	150944961	150978321	clinigen
KCNH5	chr14	62699464	63102037	clinigen
KCNJ1	chr11	128836315	128867373	clinigen
KCNJ10	chr1	159998651	160070483	clinigen
KCNJ11	chr11	17365172	17389331	clinigen
KCNJ16	chr17	70053429	70135608	clinigen
KCNJ2	chr17	70168673	70180044	clinigen
KCNJ5	chr11	128891356	128921163	clinigen
KCNJ8	chr12	21764955	21775600	clinigen
KCNK3	chr2	26692722	26733420	clinigen
KCNK9	chr8	139600838	139704109	clinigen
KCNMA1	chr10	76869601	77638369	clinigen
KCNQ1	chr11	2444654	2849105	clinigen
KCNQ1OT1	chr11	2597308	2700003	clinigen
KCNQ2	chr20	63400208	63472677	clinigen
KCNQ4	chr1	40783787	40840452	clinigen
KCNT1	chr9	135702185	135795508	clinigen
KCNV2	chr9	2717510	2730037	clinigen
KCTD7	chr7	66628881	66649067	clinigen
KDM5B	chr1	202724495	202808487	clinigen
KDM5C	chrX	53176283	53225422	clinigen
KDM6A	chrX	44873188	45112779	clinigen
KDM6B	chr17	7834217	7854796	clinigen
KDR	chr4	55078481	55125595	clinigen
KDSR	chr18	63327726	63367228	clinigen
KERA	chr12	91050491	91058024	clinigen
KHDC3L	chr6	73362658	73364171	clinigen
KIF11	chr10	92574105	92655395	clinigen
KIF1A	chr2	240713761	240824293	clinigen
KIF1B	chr1	10210570	10381603	clinigen
KIF1C	chr17	4997950	5028401	clinigen
KIF21A	chr12	39293228	39443390	clinigen
KIF5A	chr12	57546026	57586633	clinigen
KIF5C	chr2	148875227	149026759	clinigen
KIF6	chr6	39329990	39725408	clinigen
KIF7	chr15	89608789	89663086	clinigen
KIFBP	chr10	68988803	69043544	clinigen
KISS1	chr1	204190341	204196491	clinigen
KIT	chr4	54657267	54740783	clinigen,tcga
KITLG	chr12	88492793	88580851	clinigen
KIZ	chr20	21125983	21246622	clinigen
KLF10	chr8	102648784	102655725	clinigen
KLF11	chr2	10042849	10054836	clinigen
KLF14	chr7	130730697	130734207	clinigen
KLF2	chr19	16324826	16328685	clinigen
KLF8	chrX	56232356	56291531	clinigen
KLHL40	chr3	42685537	42692544	clinigen
KLHL41	chr2	169509702	169526258	clinigen
KLK1	chr19	50819146	50823787	clinigen
KLK12	chr19	51029092	51035230	clinigen
KLKB1	chr4	186226438	186258471	clinigen
KLLN	chr10	87859158	87863533	clinigen
KMO	chr1	241532134	241595642	clinigen
KMT2A	chr11	118436456	118526832	clinigen
KMT2B	chr19	35717973	35738880	clinigen
KMT2C	chr7	152134922	152436644	clinigen
KMT2D	chr12	49018975	49060794	clinigen
KMT2E	chr7	104940943	105115019	clinigen
KMT5B	chr11	68154863	68213852	clinigen
KNG1	chr3	186717348	186744410	clinigen
KRAS	chr12	25205246	25250936	clinigen,tcga,cogiv
KRIT1	chr7	92197498	92246166	clinigen
KRT24	chr17	40697991	40703752	clinigen
KRT37	chr17	41420547	41424585	clinigen
KYNU	chr2	142877657	143055833	clinigen
L1CAM	chrX	153861514	153886173	clinigen
L2HGDH	chr14	50237563	50312229	NA,cogiv
L3MBTL1	chr20	43489442	43550954	clinigen
LAMA1	chr18	6941742	7117797	clinigen
LAMA2	chr6	128883138	129516566	clinigen
LAMA3	chr18	23689453	23956222	clinigen
LAMA4	chr6	112107931	112254939	clinigen
LAMB1	chr7	107923799	108003213	clinigen
LAMC2	chr1	183186238	183245127	clinigen
LAMC3	chr9	131009174	131094473	clinigen
LAMP2	chrX	120426148	120469365	clinigen
LARGE1	chr22	33162226	33922841	clinigen
LARS2	chr3	45388561	45554726	clinigen
LAS1L	chrX	65438549	65534810	clinigen
LAT	chr16	28984826	28990784	clinigen
LBR	chr1	225401502	225428925	clinigen
LBX1	chr10	101226994	101229463	clinigen
LCA5	chr6	79484991	79537458	clinigen
LCK	chr1	32251244	32286165	clinigen
LCT	chr2	135787850	135837184	clinigen
LDB3	chr10	86666785	86736072	clinigen
LDLR	chr19	11089418	11133820	clinigen,cogiv
LDLRAP1	chr1	25543606	25568886	clinigen
LEMD3	chr12	65169583	65248355	clinigen
LEPR	chr1	65420652	65641559	clinigen
LETM1	chr4	1811479	1856156	clinigen
LFNG	chr7	2512529	2529177	clinigen
LGALSL	chr2	64453969	64461381	clinigen
LGI1	chr10	93757840	93806272	clinigen
LHFPL5	chr6	35797206	35845397	clinigen
LHX3	chr9	136196250	136205128	clinigen
LHX4	chr1	180230264	180278984	clinigen
LIAS	chr4	39459004	39485109	clinigen
LIFR	chr5	38474668	38608354	clinigen
LIG4	chr13	108207439	108218368	clinigen,cogiv
LIMK1	chr7	74082933	74122525	clinigen
LINS1	chr15	100559369	100603230	clinigen
LIPA	chr10	89213569	89414557	clinigen
LIPT1	chr2	99154955	99163157	clinigen
LITAF	chr16	11547722	11636381	clinigen
LMAN1	chr18	59327823	59359265	clinigen
LMBR1	chr7	156668946	156893216	clinigen
LMBRD1	chr6	69672757	69867236	clinigen
LMNA	chr1	156082572	156140081	clinigen
LMNB1	chr5	126776623	126837020	clinigen
LMO1	chr11	8224309	8268716	NA,tcga
LMOD3	chr3	69106065	69123032	clinigen
LMTK3	chr19	48485271	48513935	clinigen
LMX1B	chr9	126613928	126701032	clinigen
LONP1	chr19	5691834	5720572	clinigen
LOX	chr5	122063195	122078413	clinigen
LOXHD1	chr18	46476972	46657220	clinigen
LPA	chr6	160531482	160664275	clinigen
LPAR6	chr13	48389567	48444704	clinigen
LPIN1	chr2	11677595	11827409	clinigen
LPIN2	chr18	2885296	3013144	clinigen
LRAT	chr4	154626945	154753120	clinigen
LRBA	chr4	150264435	151015727	clinigen
LRP2	chr2	169127109	169362534	clinigen
LRP5	chr11	68312591	68449275	clinigen
LRPAP1	chr4	3503612	3532446	clinigen
LRPPRC	chr2	43886224	43996226	clinigen
LRRC10	chr12	69608564	69610907	clinigen
LRRC56	chr11	537527	554912	clinigen
LRRK2	chr12	40196744	40369285	clinigen
LRTOMT	chr11	72080331	72110782	clinigen
LSS	chr21	46188141	46228824	clinigen
LTBP2	chr14	74498183	74612378	clinigen
LTC4S	chr5	179793980	179796647	clinigen
LYRM7	chr5	131170944	131205428	clinigen
LYST	chr1	235661041	235883724	clinigen
LZTR1	chr22	20982269	20999032	clinigen
MACF1	chr1	39081316	39487177	clinigen
MAFB	chr20	40685848	40689236	clinigen
MAGEL2	chr15	23643549	23647867	clinigen
MAGI2	chr7	78017055	79453667	clinigen
MAGT1	chrX	77825747	77899271	clinigen
MAK	chr6	10762723	10838553	clinigen
MALT1	chr18	58671465	58754477	clinigen
MAN1B1	chr9	137086857	137109189	clinigen
MAN2B1	chr19	12646511	12666742	clinigen
MANBA	chr4	102630770	102760994	clinigen
MAOA	chrX	43654907	43746817	clinigen
MAP2K1	chr15	66386837	66491656	clinigen,tcga
MAP2K2	chr19	4090321	4124122	clinigen,tcga
MAP3K1	chr5	56815549	56896152	clinigen
MAP3K20	chr2	173075435	173268015	clinigen
MAPK8IP3	chr16	1706166	1770351	clinigen
MAPKBP1	chr15	41774434	41827855	clinigen
MAPT	chr17	45894527	46028334	clinigen
MARS1	chr12	57475445	57517569	clinigen
MARS2	chr2	197705369	197708395	clinigen
MARVELD2	chr5	69415065	69444330	clinigen
MASP2	chr1	11022009	11047239	clinigen
MAT1A	chr10	80271820	80289658	clinigen
MAT2A	chr2	85539168	85545281	clinigen
MATN3	chr2	19992052	20012668	clinigen
MATR3	chr5	139293674	139331677	clinigen
MAX	chr14	65006174	65102695	clinigen,tcga,cogiv
MBD5	chr2	148021011	148516971	clinigen
MBTPS2	chrX	21839617	21885423	clinigen
MC2R	chr18	13882044	13915707	clinigen
MC4R	chr18	60371062	60372775	clinigen
MCCC1	chr3	183015218	183116075	clinigen
MCCC2	chr5	71579531	71658706	clinigen
MCEE	chr2	71109684	71130239	clinigen
MCFD2	chr2	46901870	46941855	clinigen
MCIDAS	chr5	55219564	55227315	clinigen
MCM2	chr3	127598223	127622436	clinigen,cogiv
MCM3AP	chr21	46235133	46286297	clinigen
MCM4	chr8	47960185	47978160	clinigen
MCOLN1	chr19	7522624	7534009	clinigen
MCPH1	chr8	6406592	6648508	clinigen
MECOM	chr3	169083499	169663775	clinigen
MECP2	chrX	154021573	154137103	clinigen
MECR	chr1	29192657	29230942	clinigen
MED12	chrX	71118543	71144103	clinigen
MED13	chr17	61942605	62065278	clinigen
MED13L	chr12	115957905	116277693	clinigen
MED23	chr6	131573966	131628242	clinigen
MED25	chr19	49818282	49840383	clinigen
MEF2C	chr5	88717117	88904257	clinigen
MEFV	chr16	3242027	3256633	clinigen
MEG3	chr14	100779410	100861031	clinigen
MEGF10	chr5	127290796	127465737	clinigen
MEGF8	chr19	42325609	42378769	clinigen
MEIS2	chr15	36889204	37101299	clinigen
MEN1	chr11	64803510	64811294	clinigen,tcga,cogiv
MERTK	chr2	111898607	112029561	clinigen
MEST	chr7	130486171	130506465	clinigen
MET	chr7	116672196	116798377	clinigen,tcga,cogiv
METTL23	chr17	76726830	76733936	clinigen
MFAP5	chr12	8637346	8662888	clinigen
MFF	chr2	227325151	227357833	clinigen
MFHAS1	chr8	8783354	8893630	clinigen
MFN2	chr1	11980181	12015211	clinigen
MFRP	chr11	119338942	119346705	clinigen
MFSD8	chr4	127917799	127966034	clinigen
MGP	chr12	14880864	14885857	clinigen
MIB1	chr18	21704957	21870953	clinigen
MID1	chrX	10445310	10833654	clinigen
MID2	chrX	107825755	107931637	clinigen
MIR96	chr7	129774692	129774769	clinigen
MITF	chr3	69739456	69968336	clinigen,tcga
MKKS	chr20	10401009	10434222	clinigen
MKRN3	chr15	23565674	23630075	clinigen
MKS1	chr17	58205441	58219605	clinigen
MLC1	chr22	50059391	50085426	clinigen
MLH1	chr3	36993226	37050896	clinigen,tcga,cogiv
MLH3	chr14	75013769	75051532	clinigen
MLPH	chr2	237485428	237555322	clinigen
MLYCD	chr16	83899115	83951445	clinigen
MMAA	chr4	145599042	145660033	clinigen
MMAB	chr12	109553715	109573580	clinigen
MMACHC	chr1	45500300	45513382	clinigen
MMADHC	chr2	149569637	149587778	clinigen
MME	chr3	155024124	155183704	clinigen
MMUT	chr6	49430360	49463253	clinigen
MNS1	chr15	56421544	56465137	clinigen
MNX1	chr7	156994051	157010663	clinigen
MOCOS	chr18	36187497	36272157	clinigen
MOCS1	chr6	39899578	39934551	clinigen
MOCS2	chr5	53095679	53110063	clinigen
MOGS	chr2	74461057	74465410	clinigen
MORC2	chr22	30925130	30968774	clinigen
MOV10	chr1	112673141	112700756	clinigen
MPDZ	chr9	13105706	13279692	clinigen
MPIG6B	chr6	31718594	31726714	clinigen
MPL	chr1	43337818	43354466	clinigen,tcga
MPLKIP	chr7	40126027	40134622	clinigen
MPST	chr22	37019635	37029821	clinigen
MPV17	chr2	27309492	27325680	clinigen
MPZ	chr1	161304735	161309968	clinigen
MPZL2	chr11	118253416	118264536	clinigen
MRAS	chr3	138347648	138405534	clinigen
MRE11	chr11	94415570	94493885	clinigen
MRPL3	chr3	131462212	131502983	clinigen
MRPL44	chr2	223957463	223967714	clinigen
MRPS16	chr10	73248843	73252693	clinigen
MRPS22	chr3	139005806	139360497	clinigen
MRPS34	chr16	1771890	1773150	clinigen
MS4A1	chr11	60455846	60470752	clinigen
MSH2	chr2	47403067	47663146	clinigen,tcga,cogiv
MSH3	chr5	80654652	80876815	clinigen
MSH6	chr2	47695530	47810063	clinigen,tcga,cogiv
MSL3	chrX	11758159	11775772	clinigen
MSN	chrX	65588377	65741931	clinigen
MSRB3	chr12	65278643	65491430	clinigen
MST1R	chr3	49886902	49903873	NA,cogiv
MSTO1	chr1	155563235	155614951	clinigen
MSX1	chr4	4859665	4863936	clinigen
MSX2	chr5	174724582	174730896	clinigen
MT-ATP6	chrM	8527	9207	clinigen
MT-ATP8	chrM	8366	8572	clinigen
MT-CO1	chrM	5904	7445	clinigen
MT-CO2	chrM	7586	8269	clinigen
MT-CO3	chrM	9207	9990	clinigen
MT-CYB	chrM	14747	15887	clinigen
MT-ND1	chrM	3307	4262	clinigen
MT-ND2	chrM	4470	5511	clinigen
MT-ND3	chrM	10059	10404	clinigen
MT-ND4	chrM	10760	12137	clinigen
MT-ND4L	chrM	10470	10766	clinigen
MT-ND5	chrM	12337	14148	clinigen
MT-ND6	chrM	14149	14673	clinigen
MT-RNR1	chrM	648	1601	clinigen
MT-RNR2	chrM	1671	3229	clinigen
MT-TA	chrM	5587	5655	clinigen
MT-TC	chrM	5761	5826	clinigen
MT-TD	chrM	7518	7585	clinigen
MT-TE	chrM	14674	14742	clinigen
MT-TF	chrM	577	647	clinigen
MT-TG	chrM	9991	10058	clinigen
MT-TH	chrM	12138	12206	clinigen
MT-TI	chrM	4263	4331	clinigen
MT-TK	chrM	8295	8364	clinigen
MT-TL1	chrM	3230	3304	clinigen
MT-TL2	chrM	12266	12336	clinigen
MT-TM	chrM	4402	4469	clinigen
MT-TN	chrM	5657	5729	clinigen
MT-TP	chrM	15956	16023	clinigen
MT-TQ	chrM	4329	4400	clinigen
MT-TR	chrM	10405	10469	clinigen
MT-TS1	chrM	7446	7514	clinigen
MT-TS2	chrM	12207	12265	clinigen
MT-TT	chrM	15888	15953	clinigen
MT-TV	chrM	1602	1670	clinigen
MT-TW	chrM	5512	5579	clinigen
MT-TY	chrM	5826	5891	clinigen
MTAP	chr9	21802636	21937651	clinigen,tcga
MTFMT	chr15	65001512	65029639	clinigen
MTHFR	chr1	11785723	11806455	clinigen
MTM1	chrX	150568417	150673143	clinigen
MTMR2	chr11	95821766	95925315	clinigen
MTO1	chr6	73461578	73509236	clinigen
MTOR	chr1	11106535	11262556	clinigen
MTPAP	chr10	30309801	30374448	clinigen
MTR	chr1	236795260	236921278	clinigen
MTRFR	chr12	123233385	123258079	clinigen
MTRR	chr5	7851186	7906025	clinigen
MTTP	chr4	99564081	99623997	clinigen
MUC1	chr1	155185824	155192916	clinigen
MUTYH	chr1	45329163	45340893	clinigen,tcga,cogiv
MYBPC3	chr11	47331406	47352702	clinigen
MYCN	chr2	15940550	15947007	clinigen
MYH10	chr17	8474207	8631376	clinigen
MYH11	chr16	15703135	15858438	clinigen
MYH14	chr19	50188186	50310542	clinigen
MYH2	chr17	10521148	10549700	clinigen
MYH6	chr14	23381982	23408273	clinigen
MYH7	chr14	23412740	23435660	clinigen
MYH9	chr22	36281280	36388010	clinigen
MYL1	chr2	210290150	210315174	clinigen
MYL2	chr12	110909996	111052434	clinigen
MYL3	chr3	46835110	46882178	clinigen
MYLK	chr3	123610049	123884332	clinigen
MYLK2	chr20	31819308	31834689	clinigen
MYMK	chr9	133514586	133528612	clinigen
MYO15A	chr17	18108756	18179802	clinigen
MYO18B	chr22	25742144	26031045	clinigen
MYO1A	chr12	57028517	57051198	clinigen
MYO1C	chr17	1464186	1492686	clinigen
MYO1E	chr15	59132434	59372871	clinigen
MYO1F	chr19	8520778	8577442	clinigen
MYO3A	chr10	25934229	26212532	clinigen
MYO5A	chr15	52307281	52529132	clinigen
MYO5B	chr18	49822789	50195164	clinigen
MYO6	chr6	75749201	75919537	clinigen
MYO7A	chr11	77128246	77215241	clinigen
MYO9A	chr15	71822291	72118577	clinigen
MYOC	chr1	171635417	171652688	clinigen
MYOM1	chr18	3066807	3219968	clinigen
MYOZ2	chr4	119135832	119187789	clinigen
MYPN	chr10	68087897	68212017	clinigen
MYT1L	chr2	1789113	2331664	clinigen
NAA10	chrX	153929225	153935080	clinigen
NAA15	chr4	139301446	139420033	clinigen
NAALADL2	chr3	174438573	175810548	clinigen
NADK2	chr5	36192589	36242279	clinigen
NAGA	chr22	42058334	42070842	clinigen
NAGLU	chr17	42536241	42544449	clinigen
NAGS	chr17	44004622	44009068	clinigen
NARS2	chr11	78435620	78575194	clinigen
NAT2	chr8	18391282	18401218	clinigen
NAT8L	chr4	2059327	2069089	clinigen
NAXE	chr1	156591756	156609507	clinigen
NBAS	chr2	15166916	15561340	clinigen
NBEA	chr13	34942270	35673022	clinigen
NBEAL2	chr3	46979666	47009704	clinigen
NBN	chr8	89924515	90003228	clinigen,tcga,cogiv
NCAPG2	chr7	158631169	158704804	clinigen
NCF1	chr7	74774011	74789315	clinigen
NCF2	chr1	183554461	183590905	clinigen
NCF4	chr22	36860988	36878017	clinigen
NCKAP1	chr2	182909115	183038858	clinigen
NDE1	chr16	15643267	15734691	clinigen
NDN	chr15	23685400	23687305	clinigen
NDP	chrX	43948776	43973395	clinigen
NDRG1	chr8	133237175	133302022	clinigen
NDUFA1	chrX	119871832	119876662	clinigen
NDUFA10	chr2	239892450	240025743	clinigen
NDUFA11	chr19	5891276	5904006	clinigen
NDUFA12	chr12	94895297	95003748	clinigen
NDUFA13	chr19	19515736	19529054	clinigen
NDUFA2	chr5	140638740	140647771	clinigen
NDUFA4	chr7	10931943	10940153	clinigen
NDUFA9	chr12	4649095	4694317	clinigen
NDUFAF1	chr15	41387218	41409403	clinigen
NDUFAF2	chr5	60945177	61154531	clinigen
NDUFAF4	chr6	96889315	96897891	clinigen
NDUFAF5	chr20	13785007	13821580	clinigen
NDUFAF6	chr8	94895533	95116455	clinigen
NDUFAF8	chr17	81239305	81241310	clinigen
NDUFB10	chr16	1959538	1961975	clinigen
NDUFB11	chrX	47142071	47145466	clinigen
NDUFB3	chr2	201071433	201085750	clinigen
NDUFB8	chr10	100523740	100530000	clinigen
NDUFC2	chr11	78068297	78079862	clinigen
NDUFS1	chr2	206114817	206159509	clinigen
NDUFS2	chr1	161197104	161214723	clinigen
NDUFS3	chr11	47565336	47584562	clinigen
NDUFS4	chr5	53560633	53683338	clinigen
NDUFS6	chr5	1801407	1816048	clinigen
NDUFS7	chr19	1383527	1395589	clinigen
NDUFS8	chr11	68030617	68036644	clinigen
NDUFV1	chr11	67605653	67612554	clinigen
NDUFV2	chr18	9102630	9134345	clinigen
NEB	chr2	151485336	151734487	clinigen
NEBL	chr10	20779973	21293011	clinigen
NECAP1	chr12	8076939	8097881	clinigen
NEDD4L	chr18	58044226	58401540	clinigen
NEDD9	chr6	11183298	11382348	clinigen
NEFH	chr22	29480218	29491390	clinigen
NEFL	chr8	24950955	24956721	clinigen
NEK1	chr4	169369704	169612632	clinigen
NEK10	chr3	27106484	27369460	clinigen
NEK8	chr17	28725897	28743455	clinigen
NELFA	chr4	1982717	2041903	clinigen
NEU1	chr6	31857659	31862905	clinigen
NEUROD1	chr2	181668295	181680827	clinigen
NEXMIF	chrX	74732856	74925472	clinigen
NEXN	chr1	77888513	77943895	clinigen
NF1	chr17	31094927	31382116	clinigen,tcga,cogiv
NF2	chr22	29603553	29698598	clinigen,tcga,cogiv
NFATC1	chr18	79395856	79529325	clinigen
NFE2L2	chr2	177218667	177392756	NA,cogiv
NFIA	chr1	60865259	61462788	clinigen
NFIX	chr19	12995475	13098796	clinigen
NFKB1	chr4	102501330	102617302	clinigen
NFKB2	chr10	102394110	102402524	clinigen
NFKBIZ	chr3	101827991	101861022	clinigen
NGF	chr1	115285904	115338770	clinigen
NGLY1	chr3	25718944	25790039	clinigen
NHEJ1	chr2	219069355	219160869	clinigen
NHLRC1	chr6	18120440	18122677	clinigen
NHP2	chr5	178149463	178153894	clinigen,tcga
NHS	chrX	17375200	17735994	clinigen
NIPA1	chr15	22773063	22829789	clinigen
NIPA2	chr15	22838644	22869362	clinigen
NIPBL	chr5	36876769	37066413	clinigen
NKX2-1	chr14	36516392	36521149	clinigen
NKX2-5	chr5	173232109	173235311	clinigen
NKX3-2	chr4	13540830	13544508	clinigen
NLGN1	chr3	173396284	174294372	clinigen
NLGN3	chrX	71144821	71175255	clinigen
NLGN4X	chrX	5840637	6228867	clinigen
NME8	chr7	37848597	37900397	clinigen
NMNAT1	chr1	9943428	9985501	clinigen
NNAT	chr20	37521206	37523690	clinigen
NOD2	chr16	50693588	50733077	clinigen
NODAL	chr10	70431936	70447951	clinigen
NOG	chr17	56593699	56595611	clinigen
NONO	chrX	71254814	71301522	clinigen
NOP10	chr15	34339159	34343180	NA,tcga
NOTCH1	chr9	136494433	136546048	clinigen
NOTCH2	chr1	119911553	120100779	clinigen
NOTCH3	chr19	15159038	15200995	clinigen,cogiv
NPC1	chr18	23506184	23586506	clinigen
NPC2	chr14	74476192	74494177	clinigen
NPHP1	chr2	110122311	110205066	clinigen
NPHP3	chr3	132680609	132722432	clinigen
NPHP4	chr1	5862811	5992473	clinigen
NPHS1	chr19	35825372	35869287	clinigen
NPPA	chr1	11845709	11848345	clinigen
NPRL3	chr16	84271	138677	clinigen
NPTX2	chr7	98617285	98629869	clinigen
NQO1	chr16	69706996	69726668	clinigen
NR0B1	chrX	30304206	30309390	clinigen
NR2F1	chr5	93583222	93594611	clinigen
NR2F2	chr15	96325938	96340263	clinigen
NR3C2	chr4	148078762	148444698	clinigen
NR4A2	chr2	156324437	156342348	clinigen
NR5A1	chr9	124481236	124507420	clinigen
NRAS	chr1	114704469	114716771	clinigen,tcga
NRG3	chr10	81875194	82987179	clinigen
NRXN1	chr2	49918503	51225575	clinigen
NSD1	chr5	177131830	177300213	clinigen
NSD2	chr4	1871393	1982207	clinigen
NSDHL	chrX	152830967	152869729	clinigen
NSUN2	chr5	6599239	6633291	clinigen
NT5C2	chr10	103087185	103277605	clinigen
NTAN1	chr16	15037854	15056079	clinigen
NTF4	chr19	49061066	49065076	clinigen
NTHL1	chr16	2039815	2047866	clinigen,tcga
NTNG1	chr1	107140007	107484923	clinigen
NTRK1	chr1	156815636	156881850	clinigen,cogiv
NUBPL	chr14	31489956	31861224	clinigen
NUDT13	chr10	73110375	73131828	clinigen
NUDT15	chr13	48037726	48047221	clinigen
NUP62	chr19	49906825	49929764	clinigen
NUS1	chr6	117675469	117710727	clinigen
NXF5	chrX	101832112	101857577	clinigen
NYX	chrX	41447343	41475710	clinigen
OAT	chr10	124397303	124418976	clinigen
OBSCN	chr1	228208044	228378876	clinigen
OBSL1	chr2	219550728	219571859	clinigen
OCA2	chr15	27754875	28099315	clinigen
OCLN	chr5	69492292	69558104	clinigen
OCRL	chrX	129539849	129592561	clinigen
ODAD1	chr19	48296457	48321971	clinigen
ODAD2	chr10	27775186	27999079	clinigen
ODAD3	chr19	11420604	11435782	clinigen
ODAD4	chr17	41930617	41966503	clinigen
OFD1	chrX	13734743	13777955	clinigen
OGT	chrX	71533087	71575892	clinigen
OPA1	chr3	193593144	193697811	clinigen
OPHN1	chrX	67949349	68433913	clinigen
OPRM1	chr6	154010496	154246867	clinigen
OPTN	chr10	13099449	13138308	clinigen
OR5AU1	chr14	21148370	21159060	clinigen
ORAI1	chr12	121626509	121643218	clinigen
ORC4	chr2	147930396	148021604	clinigen
ORC6	chr16	46689643	46698394	clinigen
OSBPL2	chr20	62231922	62296213	clinigen
OSBPL5	chr11	3087107	3166739	clinigen
OSTM1	chr6	108029245	108165854	clinigen
OTC	chrX	38327598	38422908	clinigen
OTOA	chr16	21663968	21761935	clinigen
OTOF	chr2	26457203	26558756	clinigen,cogiv
OTOG	chr11	17547259	17647150	clinigen
OTOGL	chr12	80099537	80380880	clinigen
OTUD7A	chr15	31475398	31870789	clinigen
OTX2	chr14	56799905	56816693	clinigen
OXCT1	chr5	41730065	41870425	clinigen
P2RX2	chr12	132618776	132622388	clinigen
P2RY12	chr3	151336843	151384753	clinigen
P3H1	chr1	42746335	42767084	clinigen
PACS1	chr11	66070272	66244744	clinigen
PAFAH1B1	chr17	2593183	2685615	clinigen
PAH	chr12	102836889	102958410	clinigen,cogiv
PAK2	chr3	196739857	196832647	clinigen
PAK3	chrX	110944285	111227361	clinigen
PALB2	chr16	23603160	23641321	clinigen,tcga,cogiv
PARK7	chr1	7954291	7985505	clinigen
PARS2	chr1	54756898	54764523	clinigen
PAX1	chr20	21705659	21718481	clinigen
PAX2	chr10	100735396	100829944	clinigen
PAX3	chr2	222199887	222298998	clinigen
PAX4	chr7	127610292	127618142	clinigen
PAX5	chr9	36833269	37034268	clinigen,tcga,cogiv
PAX6	chr11	31784779	31817961	clinigen
PAX7	chr1	18630846	18748866	clinigen
PAX8	chr2	113215997	113278921	clinigen
PAX9	chr14	36657568	36679362	clinigen
PBX1	chr1	164555584	164899296	clinigen
PC	chr11	66848417	66958386	clinigen
PCARE	chr2	29060976	29074523	clinigen
PCBD1	chr10	70882280	70888565	clinigen
PCCA	chr13	100089015	100530437	clinigen,cogiv
PCCB	chr3	136250340	136337896	clinigen
PCDH15	chr10	53802771	55627942	clinigen
PCDH19	chrX	100291644	100410273	clinigen
PCDH9	chr13	66302834	67230445	clinigen
PCDHGA8	chr5	141390157	141512975	clinigen
PCGF2	chr17	38733898	38749817	clinigen
PCSK9	chr1	55039445	55064852	clinigen
PCYT1A	chr3	196214222	196287957	clinigen
PDCD10	chr3	167683298	167734939	clinigen
PDE11A	chr2	177623244	178108339	NA,cogiv
PDE4D	chr5	58969038	60522120	clinigen
PDE6A	chr5	149857953	149944793	clinigen
PDE6B	chr4	625573	670782	NA,cogiv
PDE6C	chr10	93612537	93666010	clinigen
PDGFD	chr11	103907189	104164379	clinigen
PDGFRA	chr4	54229280	54298245	clinigen,tcga
PDHA1	chrX	19343893	19361718	clinigen
PDHB	chr3	58427630	58433857	clinigen
PDHX	chr11	34915829	35020591	clinigen
PDLIM3	chr4	185500660	185535507	clinigen
PDP1	chr8	93857807	93926068	clinigen
PDSS2	chr6	107152562	107459564	clinigen
PDX1	chr13	27920000	27926313	clinigen
PDZD7	chr10	101007679	101032295	clinigen
PEG10	chr7	94656325	94669695	clinigen
PEG3	chr19	56810077	56840728	clinigen
PEPD	chr19	33386950	33521823	clinigen
PET100	chr19	7629788	7631956	clinigen
PET117	chr20	18137863	18143169	clinigen
PEX1	chr7	92487020	92528520	clinigen
PEX10	chr1	2403964	2413797	clinigen
PEX11A	chr15	89677764	89690783	clinigen
PEX11B	chr1	145911350	145918717	clinigen
PEX11G	chr19	7476875	7497449	clinigen
PEX12	chr17	35574795	35578863	clinigen
PEX13	chr2	61017225	61051990	clinigen
PEX14	chr1	10472288	10630758	clinigen
PEX16	chr11	45909663	45918812	clinigen
PEX19	chr1	160276807	160286348	clinigen
PEX2	chr8	76980258	77001044	clinigen
PEX26	chr22	18077923	18105396	clinigen
PEX3	chr6	143450805	143490616	clinigen
PEX5	chr12	7188685	7218574	clinigen
PEX6	chr6	42963865	42979181	clinigen
PEX7	chr6	136822564	136913934	clinigen
PFN1	chr17	4945652	4949061	clinigen
PGAP3	chr17	39671122	39696797	clinigen
PGK1	chrX	77910739	78129295	clinigen
PGM1	chr1	63593411	63660245	clinigen
PGM3	chr6	83147324	83193936	clinigen
PHC1	chr12	8913896	8941467	clinigen
PHEX	chrX	22032325	22494713	clinigen
PHF2	chr9	93576584	93679587	clinigen
PHF21A	chr11	45929319	46121454	clinigen
PHF3	chr6	63635802	63779336	clinigen
PHF6	chrX	134373288	134428791	clinigen
PHF8	chrX	53936676	54048958	clinigen
PHGDH	chr1	119648411	119744218	clinigen
PHIP	chr6	78934419	79078287	clinigen
PHKB	chr16	47461123	47701523	clinigen
PHKG2	chr16	30748293	30761176	clinigen
PHLDA2	chr11	2928273	2929420	clinigen
PHOX2B	chr4	41744082	41748725	clinigen,tcga,cogiv
PHYH	chr10	13277796	13302412	clinigen
PHYKPL	chr5	178208471	178232802	clinigen
PIEZO1	chr16	88715338	88785220	clinigen
PIGA	chrX	15319452	15335554	clinigen
PIGL	chr17	16217191	16351797	clinigen
PIGN	chr18	61905255	62187118	clinigen
PIGO	chr9	35087237	35096619	clinigen
PIGU	chr20	34560542	34698790	clinigen
PIGW	chr17	36534987	36539310	clinigen
PIK3CA	chr3	179148114	179240093	clinigen,cogiv
PIK3CD	chr1	9629889	9729114	clinigen
PIK3CG	chr7	106865278	106908980	clinigen
PIK3R1	chr5	68215740	68301821	clinigen
PIK3R2	chr19	18153163	18170532	clinigen
PINK1	chr1	20633458	20651511	clinigen
PIP5K1C	chr19	3630183	3700468	clinigen
PITPNA	chr17	1517718	1562792	clinigen
PITX2	chr4	110617423	110642123	clinigen
PITX3	chr10	102230189	102241512	clinigen
PJVK	chr2	178451346	178462102	clinigen
PKD1	chr16	2088708	2135898	clinigen
PKD2	chr4	88007635	88077777	clinigen
PKHD1	chr6	51615299	52087613	clinigen
PKP2	chr12	32790745	32896798	clinigen
PLA2G4A	chr1	186828949	186988981	clinigen
PLA2G6	chr22	38111495	38214778	clinigen
PLAGL1	chr6	143940300	144064599	clinigen
PLAT	chr8	42174718	42207709	clinigen
PLAU	chr10	73909177	73917496	clinigen
PLCB1	chr20	8077251	8968360	clinigen
PLEC	chr8	143915153	143976734	clinigen
PLEKHG5	chr1	6467122	6520074	clinigen
PLEKHM2	chr1	15684320	15734769	clinigen
PLG	chr6	160702194	160754097	clinigen
PLN	chr6	118548296	118561716	clinigen
PLOD1	chr1	11934205	11975538	clinigen
PLOD2	chr3	146035139	146163725	clinigen
PLOD3	chr7	101205977	101218420	clinigen
PLP1	chrX	103773718	103792619	clinigen
PMM2	chr16	8788823	8862534	clinigen,cogiv
PMP2	chr8	81440326	81447439	clinigen
PMP22	chr17	15229773	15272292	clinigen
PMS1	chr2	189784085	189877629	clinigen,tcga
PMS2	chr7	5970925	6009130	clinigen,tcga,cogiv
PNKP	chr19	49859882	49878351	clinigen
PNP	chr14	20461992	20477094	clinigen
PNPLA2	chr11	818914	825573	clinigen
PNPLA6	chr19	7534004	7561764	clinigen
PNPO	chr17	47941506	47949308	clinigen
PNPT1	chr2	55634061	55693863	clinigen
POGLUT1	chr3	119468963	119494708	clinigen
POGZ	chr1	151402724	151459494	clinigen
POLD1	chr19	50384204	50418018	clinigen,tcga,cogiv
POLD2	chr7	44114631	44124358	clinigen
POLE	chr12	132623753	132687376	clinigen,tcga,cogiv
POLG	chr15	89305198	89334861	clinigen
POLH	chr6	43576185	43620523	clinigen,tcga,cogiv
POLL	chr10	101578882	101588270	clinigen
POLR1D	chr13	27620742	27744237	clinigen
POLR2A	chr17	7484366	7514616	clinigen
POMGNT1	chr1	46188683	46220305	clinigen
POMGNT2	chr3	43079229	43106085	clinigen
POMP	chr13	28659065	28678959	clinigen
POMT1	chr9	131502789	131523806	clinigen
POMT2	chr14	77274956	77320883	clinigen
POR	chr7	75899200	75986855	clinigen
PORCN	chrX	48508959	48520814	clinigen
POT1	chr7	124822386	124929983	NA,tcga,cogiv
POU2AF1	chr11	111352255	111455630	clinigen
POU3F4	chrX	83508290	83512127	clinigen
POU4F3	chr5	146338839	146341728	clinigen
PPIB	chr15	64155740	64163134	clinigen
PPIP5K1	chr15	43533462	43590208	clinigen
PPM1D	chr17	60600193	60666280	clinigen
PPM1K	chr4	88257620	88284769	clinigen
PPP1CB	chr2	28751640	28802940	clinigen
PPP1R12A	chr12	79773563	79935460	clinigen
PPP1R9A	chr7	94907202	95296415	clinigen
PPP2R1A	chr19	52170936	52229518	clinigen
PPP2R5D	chr6	42984553	43012342	clinigen
PPT1	chr1	40072710	40097260	clinigen
PQBP1	chrX	48890197	48903402	clinigen
PRCD	chr17	76527586	76553578	clinigen
PRDM16	chr1	3069168	3438621	clinigen
PRDM6	chr5	123089241	123194266	clinigen
PRDM9	chr5	23443586	23528093	NA,tcga,cogiv
PREPL	chr2	44316281	44361862	clinigen
PRF1	chr10	70597348	70602759	clinigen,tcga,cogiv
PRG4	chr1	186296279	186314567	clinigen
PRICKLE1	chr12	42456757	42590355	clinigen
PRICKLE2	chr3	64092236	64445476	clinigen
PRKAG2	chr7	151556124	151877214	clinigen
PRKAR1A	chr17	68511780	68551319	clinigen,tcga,cogiv
PRKCA	chr17	66302613	66810743	clinigen
PRKCSH	chr19	11435284	11450968	clinigen
PRKDC	chr8	47773111	47960178	clinigen
PRKG1	chr10	50990888	52298423	clinigen
PRKN	chr6	161347417	162727775	clinigen
PROC	chr2	127418427	127429242	clinigen
PRODH	chr22	18912777	18936553	clinigen
PRODH2	chr19	35799988	35813299	clinigen
PROK2	chr3	71771655	71785206	clinigen
[truncated: 774 more rows]
