# Supplementary material for: Toward best practices for detecting germline small variants: a large-scale real-world WES benchmarking study using the Quartet DNA reference materials
Source: Research Square preprint supplement (doi:10.21203/rs.3.rs-4525252/v1), 2024-07-09
Supplement: Supplementary file 2 [file 7fc16533c024536065fff0ad.xlsx]

## Sheet: Sheet1
no	lot	targeted_bed_region (bp)	input_dna_amount (ng)	capture_kit	fragment_method	sharing_time (s)	pcr_cycle	qc_size (bp)	qc_concentration (ng/uL)	sequence_tech	sequence_machine	sequence_method	preprocessing	alignment	variant_calling	variant_filtration	variant_filtration_snv_indel_separately	bqsr
5	1	42881294	550	KAPA	ultrasonic	180	6	360	22.4	Illumina	XTen	PE150	Fastp	BWA	GATK HaplotypeCaller GVCF	GATK HardFiltration	Y	Y
6	1	60507855	200	Agilent v6	enzymatic	/	9	490	37.4	Illumina	Novaseq	PE150	Fastp	BWA	GATK HaplotypeCaller	GATK HardFiltration	Y	Y
7	1	53510934	500	MyGenostics	enzymatic	/	7	300	91.0	BGI	DNBSEQ-T7	PE150	Cutadapt	Sentieon BWA	Sentieon DNAscope	GATK HardFiltration	N	/
8	1	38860924	250	IDT v1	enzymatic	/	6	230	14.5	Illumina	Nextseq 550AR	PE150	Fastp	BWA	GATK HaplotypeCaller GVCF	GATK HardFiltration	Y	N
9	1	60507855	500	Agilent v6	enzymatic	/	4	350	29.2	Illumina	Novaseq	PE150	Fastp	BWA	GATK HaplotypeCaller	GATK HardFiltration	Y	Y
12	2	34149606	300	IDT v2	ultrasonic	170	7	350	85.8	Illumina	Novaseq	PE150	Cutadapt	BWA	BCFtools	inhouse	/	/
13	2	66176149	200	IGT v1	enzymatic	/	7	396	17.2	BGI	DNBSEQ-T7	PE150	Trimmomatic	BWA	GATK HaplotypeCaller	GATK HardFiltration	N	Y
14	1	63880654	500	Agilent v6	ultrasonic	150	10	362	58.1	Illumina	Novaseq	PE150	Fastp	BWA	GATK HaplotypeCaller	GATK HardFiltration	N	N
15	1	38227700	280	Agilent v6	ultrasonic	280	10	290	2.03	Illumina	Novaseq	PE150	Trimmomatic	BWA	GATK HaplotypeCaller GVCF	GATK HardFiltration	Y	N
16	2	34861052	317	KAPA	ultrasonic	480	8	375	65.4	Illumina	Novaseq	PE150	NA	BWA	Speedseq	GATK HardFiltration	N	/
17	2	60009999	50	NanoWES	enzymatic	/	12	350	83.6	Illumina	Novaseq	PE150	Cutadapt	BWA	VeritaTrekker	VeritaTrekker	/	/
18	2	34688948	200	NadPrep Exome Plus Panel	enzymatic	/	5	400	57.3	BGI	DNBSEQ-T7	PE150	Fastp	BWA	GATK HaplotypeCaller	GATK HardFiltration	/	Y
19	2	42988611	100	KAPA	enzymatic	/	6	456	97.4	Illumina	Novaseq	PE150	Fastp	DRAGEN	DRAGEN	HardFiltration	/	/
20	1	60507855	500	Agilent v6	ultrasonic	150	6	280	4.2	Illumina	Novaseq	PE150	Fastp	BWA	GATK HaplotypeCaller	GATK CNN	Y	Y
21	2	35799273	400	Twist	ultrasonic	140	6	412	49.1	Illumina	Novaseq	PE150	AdapterRemoval	BWA	GATK HaplotypeCaller	GATK HardFiltration	N	N
22	2	50446305	230	Agilent v5	ultrasonic	360	9	330	2.2	Illumina	Novaseq	PE150	Fastp	BWA	Sentieon Haplotyper	Sentieon VQSR	Y	Y
23	1	36715240	400	Twist	enzymatic	/	6	370	44.3	BGI	DNBSEQ-T7	PE100	NA	BWA	GATK HaplotypeCaller GVCF	HardFiltration	N	Y
24	2	52426210	200	NadPrep Exome Plus Panel	enzymatic	/	7	388	105	Illumina	Novaseq	PE150	Fastp	BWA	GATK HaplotypeCaller	GATK HardFiltration	N	Y
25	2	59182274	250	IDT v1	ultrasonic	240	9	350	5	Illumina	Novaseq	PE150	Trimmomatic	BWA	VarSan	HardFiltration	Y	/
26	1	42988611	300	KAPA	enzymatic	/	8	418	103	BGI	MGISEQ-2000	PE100	SOAPnuke	BWA	GATK HaplotypeCaller	GATK HardFiltration	Y	Y
27	2	38860924	400	IDT v1	ultrasonic	1080	11	411	10.7nmol/L	Illumina	Novaseq	PE150	Fastp	BWA	GATK HaplotypeCaller + Freebayes	GATK HardFiltration	Y	N
28	2	32702234	500	NA	ultrasonic	245	6	405	1.8	Illumina	Novaseq	PE150	Trimmomatic	BWA	GATK HaplotypeCaller + DeteX	inhouse	/	Y
29	2	38418310	600	IGT v2	ultrasonic	90	5	320	47.5	Illumina	Novaseq	PE150	Fastp	BWA	GATK HaplotypeCaller	GATK HardFiltration	Y	N
30	2	35984170	200	IDT v2	enzymatic	/	6	297	70.3	Illumina	Novaseq	PE150	NA	BWA	GATK HaplotypeCaller	GATK HardFiltration	N	N
31	2	60507855	1000	Agilent v6	ultrasonic	450	6	350	58.4	Illumina	Novaseq	PE150	Fastp	BWA	GATK HaplotypeCaller	GATK HardFiltration	Y	N
32	2	53510934	300	MyGenostics	enzymatic	/	7	336	11	BGI	DNBSEQ-T7	PE150	Cutadapt	Sentieon BWA	Sentieon DNAscope	GATK HardFiltration	N	/
33	1	34149606	200	IDT v2	enzymatic	/	7	375	73.4nmol/L	Illumina	Novaseq	PE150	Cutadapt	BWA	Deepvariant	/	/	/
34	1	34061763	100	IDT v2	enzymatic	/	10	400	37.2	Illumina	Novaseq	PE150	Fastp	BWA	GATK HaplotypeCaller	GATK HardFiltration	Y	N
35	1	46739246	100	NadPrep Exome Plus Panel	ultrasonic	130	8	350	74.1	Illumina	Novaseq	PE150	Fastp	BWA	GATK HaplotypeCaller GVCF	GATK HardFiltration	Y	N
36	1	39570560	300	IGT v2	enzymatic	/	5	400	99.9	Illumina	Novaseq	PE150	Trimmomatic	BWA	GATK HaplotypeCaller	GATK HardFiltration	N	Y
37	1	63782560	450	IDT v1	ultrasonic	390	6	379	52.8	Illumina	Novaseq	PE150	Fastp	BWA	GATK HaplotypeCaller GVCF	GATK HardFiltration	Y	Y
38	2	60009999	50	NanoWES	enzymatic	/	12	204	48.6	Illumina	Novaseq	PE150	Cutadapt	BWA	Strelka2	inhouse	/	/
39	1	34149606	100	IDT v2	enzymatic	/	10	400	33.8	Illumina	Novaseq	PE150	Trimmomatic	BWA	GATK HaplotypeCaller	GATK HardFiltration	Y	Y
40	1	33686616	200	IDT v2	enzymatic	/	6	390	24.6	Illumina	Novaseq	PE150	Fastp	BWA	GATK HaplotypeCaller GVCF	GATK HardFiltration	Y	N
41	2	42988611	300	KAPA	enzymatic	/	8	400	105	BGI	MGISEQ-2000	PE100	Fastp	BWA	GATK HaplotypeCaller + Freebayes	GATK HardFiltration	Y	Y
42	1	42988611	300	KAPA	enzymatic	/	8	440	103.7	BGI	MGISEQ-2000	PE100	SOAPnuke	BWA	GATK HaplotypeCaller	GATK HardFiltration	Y	Y
43	2	75044067	200	NA	ultrasonic	480	8	341	70.1	BGI	DNBSEQ-T7	PE150	Fastp	BWA	GATK HaplotypeCaller	GATK VQSR + HardFiltration	Y	Y
44	1	100810660	500	Agilent v6	ultrasonic	1080	6	230	13.1	Illumina	Novaseq	PE150	Fastp	BWA	GATK HaplotypeCaller	GATK HardFiltration	Y	Y
45	2	72743999	200	NA	ultrasonic	110	8	366	56.2	BGI	DNBSEQ-T7	PE100	SOAPnuke	BWA	GATK HaplotypeCaller	GATK HardFiltration	/	N
46	1	38860894	200	IDT v1	ultrasonic	175	8	310	37.6	BGI	DNBSEQ-T7	PE150	Fastp	Sentieon BWA	Sentieon Haplotyper	GATK HardFiltration	N	Y
47	1	34149606	100	IDT v2	enzymatic	/	8	311	72.9	Illumina	Novaseq	PE150	filter v1.0.0/UMI	BWA	GATK HaplotypeCaller	GATK HardFiltration	Y	Y
48	2	46739246	200	NadPrep Exome Plus Panel	enzymatic	/	5	400	110	BGI	MGISEQ-2000	PE100	Fastp	BWA	GATK HaplotypeCaller	GATK HardFiltration	Y	Y
49	1	72565520	500	NA	ultrasonic	160	5	490	24.1	BGI	DNBSEQ-T7	PE150	SOAPnuke	BWA	Sentieon DNAscope	/	/	/
50	2	41621960	250	Agilent v8	ultrasonic	150	8	375	1.6	Illumina	Nextseq 550AR	PE150	NA	BWA	GATK HaplotypeCaller	GATK HardFiltration	Y	Y
51	2	60507855	250	Agilent v6	ultrasonic	250	12	302	9.41	Illumina	Novaseq	PE150	Trimmomatic	BWA	GATK HaplotypeCaller	inhouse	Y	Y
52	1	38860924	500	IDT v1	ultrasonic	1080	6	230	13.0nmol/L	Illumina	Novaseq	PE150	Fastp	BWA	GATK HaplotypeCaller + Freebayes + BCFtools	GATK HardFiltration	Y	Y
53	1	39416606	200	IGT v2	enzymatic	/	5	383	9.1	Illumina	Novaseq	PE150	Trimmomatic	BWA	GATK HaplotypeCaller GVCF	GATK HardFiltration	N	N
54	2	67306275	100	Agilent v6	enzymatic	/	12	328	6.8	Illumina	Novaseq	PE150	Fastp	BWA	GATK HaplotypeCaller GVCF	GATK HardFiltration	Y	N
55	2	30451306	200	NA	enzymatic	/	9	311	110.7	Illumina	Novaseq	PE150	Cutadapt	Sentieon BWA	Sentieon Haplotyper	GATK HardFiltration	N	Y
56	1	32813880	613	IDT v2	ultrasonic	180	4	300	28.2	Illumina	Novaseq	PE150	Fastp	BWA	GATK HaplotypeCaller	GATK HardFiltration	Y	Y
57	2	42859883	200	KAPA	enzymatic	/	8	453	50.9	Illumina	Novaseq	PE150	Fastp	BWA	GATK HaplotypeCaller	GATK HardFiltration	Y	Y
58	2	38227700	500	Agilent v6	ultrasonic	360	5	380	60.3	Illumina	Novaseq	PE150	Fastp	BWA	GATK HaplotypeCaller GVCF	GATK HardFiltration	N	Y
59	2	50842387	500	IDT v1	ultrasonic	110	5	496	10.3	Illumina	Novaseq	PE150	Fastp	BWA	GATK HaplotypeCaller GVCF	GATK HardFiltration	Y	Y
60	2	42052935	100	IDT v1	enzymatic	/	7	382	43	BGI	MGISEQ-2000	PE150	Fastp	Sentieon BWA	Sentieon DNAscope	HardFiltration	/	/
61	1	38860924	225	IDT v1	ultrasonic	1080	6	230	14.5	Illumina	Novaseq	PE150	Fastp	BWA	GATK HaplotypeCaller	GATK HardFiltration	/	Y
62	2	38996446	300	IDT v1	enzymatic	/	7	275	55.8	BGI	DNBSEQ-T7	PE150	Cutadapt	Sentieon BWA	Sentieon Haplotyper	GATK HardFiltration	Y	Y
63	2	59182274	250	IDT v1	ultrasonic	240	9	350	5	Illumina	Novaseq	PE150	Trimmomatic	BWA	VarSan	VarSan	Y	/
64	2	42325264	300	IDT v2	ultrasonic	210	7	402	47	Illumina	Novaseq	PE150	Fastp	BWA	GATK HaplotypeCaller GVCF	GATK VQSR + HardFiltration	Y	Y
65	1	60507855	200	Agilent v6	ultrasonic	240	9	200	13	Illumina	Novaseq	PE150	Fastp	BWA	GATK HaplotypeCaller GVCF	GATK HardFiltration	Y	Y
66	1	38860924	676	IDT v1	ultrasonic	1080	6	230	14.7	Illumina	Novaseq	PE150	Fastp	BWA	GATK HaplotypeCaller	inhouse	Y	Y
67	2	34149606	300	IDT v2	ultrasonic	170	7	350	93	Illumina	Novaseq	PE150	Cutadapt	BWA	GATK HaplotypeCaller	GATK HardFiltration	Y	Y
68	1	60507855	200	Agilent v6	enzymatic	/	9	487	39.2	Illumina	Novaseq	PE150	Fastp	BWA	Deepvariant	GATK HardFiltration	N	/
69	1	13682726	500	Agilent v6	ultrasonic	1080	6	230	15.6	Illumina	Novaseq	PE150	Fastp	BWA	GATK HaplotypeCaller GVCF	GATK HardFiltration	Y	N
70	2	38860924	225	IDT v1	ultrasonic	1080	6	230	14.5	Illumina	Novaseq	PE150	Fastp	BWA	GATK HaplotypeCaller GVCF	GATK HardFiltration	Y	N
71	2	53510934	500	MyGenostics	enzymatic	/	7	394	23.5	Illumina	Novaseq	PE150	Cutadapt	Sentieon BWA	Sentieon DNAscope	GATK HardFiltration	N	/
72	1	53510934	500	MyGenostics	enzymatic	/	7	300	98	BGI	DNBSEQ-T7	PE150	Cutadapt	Sentieon BWA	Sentieon DNAscope	GATK HardFiltration	N	/
75	1	42019204	200	IDT v1	ultrasonic	1440	7	250	98.5	BGI	MGISEQ-2000	PE100	Fastp	BWA	GATK HaplotypeCaller	GATK HardFiltration	N	Y
76	2	38227700	500	Agilent v6	ultrasonic	180	12	357	41.2	Illumina	Novaseq	PE150	Fastp	BWA	GATK HaplotypeCaller GVCF	GATK HardFiltration	N	Y
77	2	34149606	350	IDT v2	ultrasonic	160	/	300	34.8	BGI	MGISEQ-2000	PE150	QIAGEN CLC	QIAGEN CLC	QIAGEN CLC	QIAGEN CLC	/	/
78	2	34591398	377	KAPA	ultrasonic	900	8	396	64	Illumina	Novaseq	PE150	NA	BWA	SmartVar	GATK HardFiltration	N	/
79	2	43558510	200	KAPA	ultrasonic	100	6	333	49.6	Illumina	Novaseq	PE150	Fastp	BWA	GATK HaplotypeCaller	inhouse	Y	N
82	2	46739246	100	NadPrep Exome Plus Panel	ultrasonic	130	8	350	65.5	Illumina	Novaseq	PE150	Fastp	BWA	GATK HaplotypeCaller GVCF	GATK HardFiltration	Y	N
83	1	42988611	300	KAPA	enzymatic	/	8	426	101.9	BGI	MGISEQ-2000	PE100	SOAPnuke	BWA	GATK HaplotypeCaller	GATK HardFiltration	Y	Y
84	1	60507855	1000	Agilent v6	ultrasonic	450	6	350	36.8	Illumina	Novaseq	PE150	Fastp	BWA	GATK HaplotypeCaller	GATK HardFiltration	Y	N
85	1	60507855	450	Agilent v6	ultrasonic	1080	6	230	14.7	Illumina	Novaseq	PE150	NA	Sentieon BWA	Sentieon DNAscope	GATK VQSR + HardFiltration	Y	/
86	1	60507855	150	Agilent v6	ultrasonic	1080	6	230	13.9	Illumina	Novaseq	PE150	Trimmomatic	BWA	GATK HaplotypeCaller	inhouse	Y	Y
87	2	34149606	300	IDT v2	ultrasonic	170	7	350	91.5	Illumina	Novaseq	PE150	Cutadapt	BWA	GATK HaplotypeCaller	GATK HardFiltration	Y	Y
88	1	51163629	200	KAPA	ultrasonic	150	8	346	26	BGI	DNBSEQ-T7	PE150	Fastp	Sentieon BWA	Sentieon Haplotyper	inhouse	N	N
89	2	42819019	300	KAPA	enzymatic	/	8	390	71.6	BGI	MGISEQ-2000	PE100	SOAPnuke	BWA	GATK HaplotypeCaller	GATK HardFiltration	Y	Y
1	1	13053470	100	NanoWES	enzymatic	/	/	300	4.8	Illumina	NextSeq CN500	PE150	Cutadapt	BWA	Strelka2	inhouse	/	/
2	1	64358630	50	NanoWES	enzymatic	/	12	226	62.5	Illumina	Novaseq	PE150	Cutadapt	BWA	Strelka2	inhouse	/	/
3	2	70330239	500	IDT v1	ultrasonic	180	6	380	73	Illumina	NextSeq CN500	PE150	Fastp	BWA	GATK HaplotypeCaller + Strelka2	GATK HardFiltration	N	N
4	1	60507855	200	Agilent v6	ultrasonic	230	10	352	14.1	Illumina	Novaseq	PE150	Trimmomatic	BWA	GATK HaplotypeCaller	GATK HardFiltration	Y	N
10	1	49731534	200	Agilent v5	ultrasonic	150	7	343	27.6	Illumina	Novaseq	PE150	Trimmomatic	BWA	inhouse	inhouse	/	/
11	1	49731534	200	Agilent v5	ultrasonic	150	7	351	25.9	Illumina	Novaseq	PE150	Trimmomatic	BWA	GATK HaplotypeCaller	GATK HardFiltration + inhouse	Y	Y
73	1	13053470	100	NA	enzymatic	/	/	300	4.8	Illumina	NextSeq CN500	PE150	Cutadapt	BWA	Strelka2	inhouse	/	/
74	1	64358630	50	NanoWES	enzymatic	/	12	197	55.5	Illumina	Novaseq	PE150	Cutadapt	BWA	Strelka2	inhouse	/	/
80	1	46423306	80	NadPrep Exome Plus Panel	enzymatic	/	5	498	49.5	BGI	MGISEQ-2000	PE150	Fastp	BWA	GATK HaplotypeCaller	GATK HardFiltration	/	N
81	1	38860924	300	IDT v1	ultrasonic	1080	6	230	14.33	Illumina	Novaseq	PE150	Fastp	BWA	GATK HaplotypeCaller	GATK HardFiltration	/	N

## Sheet: Sheet2
实验室编码	批次	备注	样本编号	备注	variants_number_before_filtration	variants_number_after_filtration	variants_inside_bed	variants_outside_bed	variants_inside_HCR	variants_outside_HCR	precision	recall	f1-score	reproducibility_inside_bed	reproducibility_outside_bed	trio_inside_bed	trio_outside_bed	quartet_inside_bed	quartet_outside_bed	Total Reads	Mapping rate	Mismatch rate	Total sequences	Median_insert_size	Median_absolute_deviation_insert_size	On-target rate	Fold-80BasePenalty80	AT_DROPOUT	GC_DROPOUT	MEDIAN_COVERAGE	PCT_1X	PCT_10X	PCT_20X	PCT_40X	PCT_60X	PCT_80X	PCT_100X	READ_LENGTH	TOTAL_BASES	Q20_BASES	Q30_BASES
101021			D5-1																	71838094	0.997858	0.004627		218	33	0.497485	1.38938	0.112038	3.25896	121	0.98767	0.98444	0.98212	0.97305	0.9374	0.85188	0.70359	150	10775714100	10367393152	9808907049
101021			D5-2																	85993249	0.997757	0.004555		218	33	0.496385	1.38108	0.112264	3.44305	145	0.98796	0.98489	0.98301	0.97775	0.96096	0.91544	0.83133	150	12898987350	12421536790	11769333371
101021			D5-3																	81291948	0.997778	0.004696		228	35	0.509642	1.39338	0.111169	3.61889	141	0.98817	0.98516	0.98319	0.97732	0.95764	0.90628	0.81399	150	12193792200	11724957239	11088049251
101021			D6-1																	83025298	0.997858	0.004549		214	32	0.49284	1.37441	0.112934	2.89121	139	0.98774	0.98494	0.98326	0.97788	0.9585	0.90594	0.80831	150	12453794700	11992645254	11359378202
101021			D6-2																	77068077	0.997785	0.004634		223	34	0.50364	1.38539	0.111855	3.72393	132	0.9881	0.98499	0.98311	0.97618	0.9505	0.88582	0.77068	150	11560211550	11122394318	10526653977
101021			D6-3																	94249751	0.997786	0.004559		219	33	0.498531	1.37762	0.112573	3.23002	159	0.9883	0.98531	0.98389	0.97995	0.96888	0.93727	0.87657	150	14137462650	13612603943	12894994399
101021			F7-1																	90528808	0.997895	0.004455		213	32	0.490922	1.37255	0.112879	2.82848	150	0.98877	0.98596	0.98434	0.97995	0.9671	0.92928	0.85319	150	13579321200	13089306880	12412553199
101021			F7-2																	76338176	0.997866	0.004581		217	33	0.495707	1.37909	0.131595	2.37421	128	0.9887	0.98593	0.98416	0.97759	0.95227	0.88277	0.75478	150	11450726400	11024124385	10439081789
101021			F7-3																	90051711	0.997834	0.004578		221	34	0.500135	1.38029	0.111683	2.8068	153	0.98895	0.98618	0.98459	0.98027	0.96786	0.93215	0.86114	150	13507756650	13003763021	12312943429
101021			M8-1																	74535962	0.997492	0.004878		213	32	0.489988	1.37164	0.119144	2.58336	123	0.98773	0.98492	0.98311	0.97549	0.94387	0.86376	0.72261	150	11180394300	10731608805	10128722311
101021			M8-2																	97791292	0.997478	0.004795		235	37	0.518302	1.39353	0.116566	4.14984	172	0.98867	0.98618	0.98475	0.98126	0.97238	0.94769	0.89947	150	14668693800	14091658417	13318484174
101021			M8-3																	100640932	0.997498	0.004794		220	34	0.499182	1.36839	0.117302	2.95103	170	0.9883	0.98585	0.98459	0.98155	0.97335	0.94959	0.9015	150	15096139800	14503372773	13706418146
101555			D5-1																	58222504	0.998807	0.002806		304	41	0.672035	1.72365	4.2315	2.37789	88	0.98194	0.97239	0.9609	0.9031	0.75736	0.57091	0.4042	150	8733375600	8561154611	8255707133
101555			D5-2																	68780127	0.998761	0.002834		300	42	0.667253	1.76865	6.26784	1.90766	102	0.9827	0.97552	0.96722	0.9272	0.82332	0.67137	0.51888	150	10317019050	10111857346	9746297590
101555			D5-3																	66115394	0.99877	0.002863		302	42	0.66951	1.73312	5.68152	2.0767	99	0.98269	0.97506	0.96616	0.92305	0.81112	0.65162	0.49444	150	9917309100	9717421112	9361968124
101555			D6-1																	63718645	0.998809	0.002761		298	43	0.666319	1.77481	6.46364	1.85316	94	0.98256	0.97481	0.96529	0.91516	0.78806	0.62053	0.46263	150	9557796750	9372619952	9042884559
101555			D6-2																	62536925	0.998671	0.002911		299	43	0.665316	1.73909	4.9084	2.1664	93	0.98254	0.97449	0.96426	0.9137	0.78598	0.61329	0.45022	150	9380538750	9187076759	8846696038
101555			D6-3																	65420837	0.99869	0.002809		294	43	0.660702	1.74723	5.83842	1.92942	96	0.98235	0.9746	0.96524	0.91878	0.79941	0.63486	0.47619	150	9813125550	9618887156	9272058133
101555			F7-1																	62975534	0.998688	0.00294		304	42	0.669851	1.73427	4.61158	2.22891	94	0.98341	0.97475	0.96454	0.91457	0.79092	0.6206	0.4585	150	9446330100	9249781844	8904041976
101555			F7-2																	70561727	0.9988	0.00282		299	42	0.665311	1.75467	5.92017	1.98874	104	0.98391	0.97679	0.96842	0.92893	0.83049	0.68449	0.53403	150	10584259050	10375927712	10003623774
101555			F7-3																	65963917	0.998655	0.002883		297	42	0.662553	1.73849	4.73998	2.29556	98	0.98282	0.97346	0.96345	0.91868	0.80714	0.64511	0.48563	150	9894587550	9692555735	9335003173
101555			M8-1																	66648615	0.998705	0.002833		305	42	0.672201	1.72679	5.07479	2.12345	100	0.98264	0.97487	0.96601	0.92584	0.81971	0.66226	0.50455	150	9997292250	9797238854	9438411431
101555			M8-2																	69403588	0.998874	0.002662		295	43	0.6611	1.74156	5.3462	2.09158	102	0.98228	0.97413	0.96566	0.92833	0.82903	0.67687	0.52146	150	10410538200	10218174175	9864254984
101555			M8-3																	70139188	0.998695	0.002753		295	43	0.661928	1.73484	5.61334	1.98542	104	0.98251	0.97473	0.96656	0.92983	0.83186	0.68304	0.52945	150	10520878200	10318933022	9961131792
101616			D5-1																	104738177	0.999991	0.006971		202	37	0.502762	2.62147	5.93737	2.7664	108	0.92598	0.89865	0.88898	0.84814	0.76427	0.65458	0.54471	150	15710726550	15086231163	14070255785
101616			D5-2																	101643670	0.999983	0.006977		214	37	0.508948	2.58828	5.5968	3.23451	109	0.92785	0.89936	0.88971	0.84989	0.7675	0.65861	0.54943	150	15246550500	14643301133	13655996411
101616			D5-3																	103601547	0.999982	0.006891		208	37	0.504936	2.61166	5.88058	2.76465	109	0.92738	0.89923	0.88972	0.85029	0.76833	0.65951	0.54986	150	15540232050	14934811989	13946558799
101616			D6-1																	89425975	0.999981	0.007566		197	36	0.497087	2.69688	5.45375	3.68697	91	0.92267	0.89634	0.88203	0.81612	0.69787	0.56687	0.45079	150	13413896250	12823057565	11870805678
101616			D6-2																	99155574	0.999981	0.00772		206	37	0.501605	2.623	6.33255	2.49592	104	0.92505	0.89822	0.88771	0.84259	0.75158	0.6362	0.52395	150	14873336100	14204015241	13127281792
101616			D6-3																	71083955	0.999986	0.007877		205	36	0.498537	2.699	5.6216	3.31413	74	0.9207	0.89437	0.87358	0.7682	0.60811	0.45988	0.34391	150	10662593250	10176253951	9401582011
101616			F7-1																	102630500	0.99999	0.006808		198	36	0.498102	2.63323	5.65761	2.94427	105	0.92575	0.89888	0.88848	0.84334	0.75359	0.63974	0.52828	150	15394575000	14791739673	13807722947
101616			F7-2																	90367495	0.99999	0.006764		205	36	0.497759	2.68276	5.25328	4.12302	94	0.92426	0.89754	0.88433	0.82439	0.7131	0.5853	0.4693	150	13555124250	13033011081	12174631501
101616			F7-3																	78240625	0.999987	0.007678		206	37	0.498558	2.61004	6.31807	2.46621	82	0.92186	0.89653	0.88022	0.79848	0.65843	0.51442	0.39478	150	11736093750	11214563051	10381284724
101616			M8-1																	105156940	0.999987	0.006758		198	36	0.498944	2.6539	5.59669	3.35214	108	0.92774	0.89862	0.88842	0.84547	0.76002	0.64991	0.54059	150	15773541000	15165185788	14167993293
101616			M8-2																	92980593	0.99998	0.006653		204	36	0.498583	2.64931	6.04228	2.77219	96	0.92333	0.89736	0.88515	0.82948	0.72353	0.59829	0.48254	150	13947088950	13415571042	12527731040
101616			M8-3																	80406782	0.999989	0.007886		204	36	0.49526	2.66377	5.77019	3.04955	83	0.92346	0.89593	0.87985	0.79996	0.66362	0.52272	0.40466	150	12061017300	11505157851	10609823583
101624			D5-1																	43136414	0.999371	0.002994		228	36	0.506068	1.8122	12.8239	0.424598	73	0.98995	0.98708	0.9742	0.85092	0.64397	0.44002	0.27453	150	6470462100	6310474199	6047884357
101624			D5-2																	55064478	0.999286	0.002988		220	35	0.496329	1.89267	14.649	0.568691	90	0.9899	0.98739	0.97998	0.9017	0.74925	0.58021	0.42753	150	8259671700	8057268179	7728142579
101624			D5-3																	47496750	0.999268	0.003012		228	36	0.505217	1.83311	13.2554	0.491743	80	0.99005	0.98748	0.97853	0.8806	0.69957	0.50845	0.34401	150	7124512500	6948421081	6661894366
101624			D6-1																	59219956	0.999302	0.003026		223	34	0.496656	1.90414	14.95	0.574516	97	0.98998	0.98766	0.98204	0.91809	0.7862	0.6317	0.4862	150	8882993400	8663557233	8302940209
101624			D6-2																	72185890	0.999412	0.002789		215	32	0.484468	1.73314	12.1294	0.367301	119	0.98982	0.98783	0.9861	0.96379	0.889	0.7693	0.63066	150	10827883500	10579865531	10163096951
101624			D6-3																	64381350	0.999211	0.003127		234	38	0.514043	1.91648	14.9213	0.597758	110	0.99038	0.98827	0.98465	0.93881	0.83291	0.69836	0.56437	150	9657202500	9410941831	9014752838
101624			F7-1																	45898275	0.999322	0.003028		228	35	0.501317	1.75781	11.1086	0.325263	79	0.99087	0.9881	0.97795	0.88006	0.69366	0.49183	0.31418	150	6884741250	6711725394	6427861697
101624			F7-2																	53551991	0.9993	0.002923		217	32	0.484935	1.80121	12.7962	0.438959	87	0.99052	0.98802	0.98007	0.90264	0.74625	0.56697	0.40266	150	8032798650	7839273659	7520165466
101624			F7-3																	38721622	0.999307	0.003071		224	35	0.49656	1.88299	13.4394	0.531368	64	0.99072	0.98642	0.96066	0.7873	0.55192	0.34758	0.19978	150	5808243300	5661547562	5421034197
101624			M8-1																	50817848	0.999346	0.002912		221	33	0.49436	1.84489	13.9319	0.501216	84	0.98981	0.98733	0.97879	0.88816	0.71884	0.53773	0.37787	150	7622677200	7439742475	7138870174
101624			M8-2																	48600179	0.999303	0.003071		221	34	0.494811	1.83422	13.5637	0.465801	80	0.9898	0.98716	0.97737	0.8776	0.69657	0.50515	0.34166	150	7290026850	7105325274	6804284422
101624			M8-3																	61550696	0.99936	0.002924		219	34	0.494265	1.8094	13.456	0.435496	101	0.98991	0.98777	0.98388	0.93488	0.81571	0.66289	0.51064	150	9232604400	9009474015	8643636170
101629			D5-1																	68020178	0.999496	0.002333		269	45	0.650463	2.3243	9.4895	1.83654	93	0.98128	0.96101	0.9279	0.83087	0.70899	0.58171	0.46229	150	10203026700	9996246901	9614699583
101629			D5-2																	60415420	0.999384	0.002587		223	32	0.588122	2.42982	11.1944	1.46419	73	0.97835	0.94809	0.89699	0.75709	0.59996	0.45377	0.33365	150	9062313000	8859595152	8499491021
101629			D5-3																	57259408	0.999539	0.002288		255	42	0.635123	2.42617	11.3742	1.42117	75	0.98031	0.95239	0.90485	0.77025	0.615	0.46918	0.34792	150	8588911200	8418108747	8101754974
101629			D6-1																	68465469	0.999451	0.002343		254	42	0.633085	2.37767	10.9077	1.40581	90	0.98086	0.95951	0.92457	0.82237	0.69644	0.5663	0.44716	150	10269820350	10061171733	9675625772
101629			D6-2																	59742536	0.999439	0.002283		249	39	0.628501	2.43836	12.3179	1.16047	77	0.98008	0.95262	0.90636	0.77586	0.62634	0.48395	0.36445	150	8961380400	8785802028	8462994320
101629			D6-3																	69259428	0.999519	0.002224		237	36	0.610151	2.42447	11.4654	1.4451	88	0.97962	0.9562	0.91798	0.81032	0.68058	0.54943	0.43092	150	10388914200	10189178062	9821958404
101629			F7-1																	52195205	0.999337	0.002681		239	36	0.611456	2.45934	11.458	1.37225	66	0.98004	0.94558	0.88577	0.72378	0.55016	0.39868	0.28119	150	7829280750	7650846279	7332896687
101629			F7-2																	57819635	0.99951	0.00226		247	38	0.623937	2.40641	10.4765	1.61749	75	0.98084	0.95283	0.90445	0.76886	0.61385	0.468	0.34616	150	8672945250	8503089503	8189005935
101629			F7-3																	57678647	0.999446	0.002582		211	39	0.584905	2.43212	10.5489	1.69737	67	0.97993	0.94563	0.88686	0.72934	0.55947	0.40947	0.29107	150	8651797050	8457244669	8108400895
101629			M8-1																	53631366	0.999407	0.002418		265	46	0.644257	2.30607	9.02724	2.05459	73	0.98085	0.9527	0.90385	0.76433	0.60247	0.45037	0.32587	150	8044704900	7875677716	7566209933
101629			M8-2																	65727951	0.999504	0.002245		244	39	0.620728	2.39743	11.5413	1.37437	85	0.98016	0.95551	0.91554	0.80287	0.66773	0.53277	0.41263	150	9859192650	9665990260	9308861066
101629			M8-3																	55120901	0.999264	0.002691		245	39	0.621238	2.41204	11.3082	1.36724	71	0.9798	0.9494	0.89748	0.75236	0.58832	0.43851	0.31734	150	8268135150	8077491852	7742102632
101680			D5-1																	186290337	0.999414	0.002562		224	62	0.496765	1.3578	4.65365	0.274712	250	0.98958	0.98566	0.98449	0.98302	0.98175	0.98049	0.97906	151	28129840887	27568744758	26471985291
101680			D5-2																	175556773	0.999455	0.00243		217	58	0.492973	1.3443	4.46138	0.211246	250	0.98921	0.98529	0.98414	0.98252	0.98118	0.97986	0.97818	151	26509072723	26009462911	25018095975
101680			D5-3																	174837539	0.999439	0.002641		224	61	0.496552	1.35784	4.75913	0.242735	250	0.9896	0.98559	0.98441	0.9828	0.98146	0.98012	0.97848	151	26400468389	25857198656	24804352962
101680			D6-1																	182882834	0.999454	0.002554		213	57	0.490706	1.34256	4.50567	0.19186	250	0.98918	0.98515	0.98402	0.98251	0.98125	0.98005	0.97863	151	27615307934	27064879948	25987457012
101680			D6-2																	167024415	0.999426	0.002434		219	60	0.495934	1.35466	4.61451	0.313098	250	0.98926	0.98532	0.98408	0.98233	0.98071	0.97911	0.97699	151	25220686665	24744648268	23803438101
101680			D6-3																	160637633	0.999461	0.002468		215	58	0.491511	1.3527	4.84395	0.213133	250	0.98908	0.98506	0.98387	0.98223	0.98083	0.97941	0.97724	151	24256282583	23788490072	22868763963
101680			F7-1																	167378520	0.99937	0.002567		216	58	0.491697	1.37219	4.6919	0.261292	250	0.98997	0.98604	0.98491	0.98326	0.98192	0.98039	0.9779	151	25274156520	24769395071	23784325179
101680			F7-2																	178701454	0.999409	0.002472		218	59	0.492772	1.37897	4.99868	0.297052	250	0.99011	0.98619	0.98506	0.98351	0.98219	0.98082	0.97877	151	26983919554	26470592307	25458069606
101680			F7-3																	179043621	0.999434	0.002567		211	56	0.488238	1.37367	5.16802	0.238785	250	0.98986	0.98599	0.98481	0.98326	0.98202	0.98073	0.9788	151	27035586771	26491741092	25432534994
101680			M8-1																	173213788	0.999217	0.002727		213	56	0.488131	1.3508	4.43954	0.268335	250	0.98925	0.98526	0.98409	0.98239	0.98089	0.97939	0.97744	151	26155281988	25591414081	24518003583
101680			M8-2																	178860431	0.999368	0.002481		223	62	0.496206	1.3466	4.39752	0.203764	250	0.98964	0.9858	0.98467	0.98314	0.98183	0.98066	0.97925	151	27007925081	26486881630	25462724386
101680			M8-3																	177925541	0.999349	0.002464		215	57	0.491108	1.35231	4.64099	0.202091	250	0.98931	0.98546	0.98435	0.98276	0.98142	0.98018	0.97859	151	26866756691	26351833447	25340026918
101688			D5-1																	83351038	0.999982	0.00523		234	46	0.57191	1.87684	2.87575	1.36452	92	0.97615	0.96505	0.95429	0.89743	0.76155	0.595	0.44787	150	12502655700	12089371649	11304629254
101688			D5-2																	83712498	0.999978	0.005133		227	43	0.565628	1.8952	2.90896	1.77659	90	0.97561	0.96442	0.9538	0.89343	0.75132	0.58294	0.43561	150	12556874700	12190172577	11504285419
101688			D5-3																	81788471	0.999979	0.005162		235	46	0.573651	1.88107	2.75513	1.79112	90	0.97622	0.96498	0.95425	0.89355	0.74924	0.57941	0.43274	150	12268270650	11896805078	11199745669
101688			D6-1																	84122844	0.999959	0.003593		236	51	0.578297	1.90744	2.12327	2.3577	91	0.97661	0.96641	0.95664	0.89764	0.75538	0.5867	0.44083	150	12618426600	12256319591	11517714486
101688			D6-2																	74830557	0.999972	0.004345		222	42	0.560445	1.80679	2.63452	1.39151	81	0.97499	0.96255	0.94876	0.8704	0.70133	0.51624	0.36384	150	11224583550	10950413113	10403332451
101688			D6-3																	92881944	0.999974	0.005029		229	48	0.572562	1.85607	2.70014	1.50198	100	0.97622	0.96648	0.95781	0.91486	0.80181	0.65013	0.50527	150	13932291600	13533055747	12785188537
101688			F7-1																	86588828	0.999979	0.004828		238	47	0.576645	1.93341	2.34103	1.98487	95	0.9786	0.96787	0.95722	0.90129	0.77355	0.61495	0.47057	150	12988324200	12606053487	11875214100
101688			F7-2																	86344513	0.999977	0.005028		237	47	0.573766	1.91722	2.18988	2.21365	95	0.97856	0.96792	0.95734	0.90104	0.77172	0.61193	0.46657	150	12951676950	12559999386	11817172550
101688			F7-3																	79258637	0.999985	0.00473		234	46	0.572506	1.92035	2.64614	1.37019	86	0.97809	0.96674	0.95369	0.88026	0.72636	0.5535	0.4081	150	11888795550	11541910027	10878090025
101688			M8-1																	82294588	0.999976	0.004861		225	44	0.564676	1.85708	2.01278	1.98623	88	0.97576	0.96508	0.95442	0.89207	0.74437	0.57097	0.42057	150	12344188200	11996709796	11339667818
101688			M8-2																	91951740	0.999979	0.004723		237	47	0.577534	1.86384	1.82025	2.24497	102	0.97671	0.96681	0.95805	0.91737	0.81011	0.66139	0.51686	150	13792761000	13394479523	12627398072
101688			M8-3																	88303116	0.999951	0.00341		235	50	0.578249	1.84173	2.12545	1.98423	97	0.9765	0.96659	0.95772	0.91204	0.79144	0.63277	0.48418	150	13245467400	12883232302	12129723616
101805			D5-1																	44682756	0.997615	0.003063		329	97	0.676044	1.94372	11.4558	1.13583	58	0.98498	0.97161	0.9395	0.73654	0.481	0.29793	0.18379	150	6702413400	6535381437	6266660192
101805			D5-2																	72520718	0.998197	0.002842		290	85	0.660729	1.90423	10.7368	1.07605	92	0.98525	0.9769	0.96651	0.90833	0.77083	0.59775	0.44307	150	10878107700	10626146453	10221783069
101805			D5-3																	54499320	0.997628	0.002948		320	96	0.6745	2.02463	13.2605	0.930145	69	0.98527	0.97491	0.95469	0.81492	0.59442	0.4102	0.27888	150	8174898000	7978036795	7664497954
101805			D6-1																	46755703	0.996461	0.003242		344	108	0.672684	1.81999	9.81324	1.07434	63	0.98581	0.9743	0.95182	0.79368	0.54002	0.33649	0.20133	150	7013355450	6829245149	6547079800
101805			D6-2																	61532914	0.997883	0.002798		302	88	0.666661	1.93669	12.229	0.999362	78	0.98505	0.97592	0.96154	0.8646	0.67454	0.48672	0.34208	150	9229937100	9019668716	8676704095
101805			D6-3																	52388805	0.997142	0.002976		324	100	0.668204	1.79912	10.4142	1.00172	70	0.9855	0.97571	0.95888	0.83763	0.61231	0.40829	0.2605	150	7858320750	7668668713	7366780966
101805			F7-1																	66484979	0.997801	0.003161		303	90	0.663883	1.92116	11.2532	1.06318	84	0.98646	0.97766	0.96473	0.88632	0.72197	0.53961	0.38923	150	9972746850	9715269337	9315840454
101805			F7-2																	55593833	0.997349	0.002869		316	94	0.665798	1.86384	10.5243	1.05525	73	0.98679	0.97673	0.95976	0.84737	0.6371	0.43828	0.29108	150	8339074950	8145721447	7834456846
101805			F7-3																	62298435	0.998281	0.002668		288	85	0.663249	2.02637	13.6422	0.914953	76	0.98595	0.97658	0.95882	0.84722	0.65266	0.47215	0.33617	150	9344765250	9142785162	8801388717
101805			M8-1																	60672243	0.997738	0.002872		273	79	0.653563	1.93907	12.131	0.906708	74	0.98466	0.97528	0.95899	0.84779	0.64273	0.45052	0.30807	150	9100836450	8884979453	8535286769
101805			M8-2																	43609434	0.9972	0.003187		339	105	0.677575	1.95432	12.0209	1.0177	56	0.98544	0.97209	0.93787	0.72235	0.46482	0.28557	0.17554	150	6541415100	6371681572	6110566783
101805			M8-3																	58146521	0.997217	0.003118		331	101	0.67466	1.93159	12.029	1.03491	75	0.98571	0.97591	0.96024	0.85232	0.65054	0.46205	0.32001	150	8721978150	8500180646	8152747213
102032			D5-1																	41750143	0.999477	0.001786		143	27	0.48282	2.90615	4.27724	6.67576	42	0.9718	0.8844	0.7654	0.52547	0.33699	0.20881	0.12733	150	6262521450	6144515383	5924432651
102032			D5-2																	44818962	0.999533	0.001775		147	29	0.472642	2.55938	2.88578	7.6613	48	0.97533	0.91115	0.81421	0.59	0.39014	0.2438	0.14728	150	6722844300	6586856001	6355286408
102032			D5-3																	44571924	0.999484	0.00178		137	24	0.491345	3.38499	3.58453	9.44807	41	0.96956	0.86759	0.74167	0.51205	0.34032	0.22275	0.14506	150	6685788600	6549560070	6307997980
102032			D6-1																	45230510	0.99946	0.001846		146	29	0.477799	2.69934	4.0932	6.31077	48	0.97523	0.90704	0.8076	0.58568	0.39242	0.25065	0.15611	150	6784576500	6643167190	6400053131
102032			D6-2																	41567870	0.999508	0.001813		149	29	0.472253	2.76762	3.24779	8.33491	44	0.97426	0.89772	0.78656	0.55018	0.35556	0.21909	0.13182	150	6235180500	6108577581	5892674952
102032			D6-3																	44777566	0.999579	0.001789		155	30	0.468061	3.0138	3.39911	9.09091	48	0.97404	0.8978	0.79371	0.57973	0.40117	0.26876	0.17689	150	6716634900	6595584055	6359210633
102032			F7-1																	43486761	0.999486	0.001736		147	28	0.475964	2.79825	4.07087	6.52764	45	0.97462	0.89883	0.79066	0.55992	0.36823	0.23298	0.14472	150	6523014150	6403600226	6182107687
102032			F7-2																	46651420	0.999512	0.001841		157	30	0.463125	2.51255	3.40858	6.3869	53	0.97789	0.9243	0.84099	0.6355	0.44033	0.28782	0.182	150	6997713000	6870913670	6624665628
102032			F7-3																	48379904	0.998976	0.002272		123	22	0.527121	4.04966	4.7429	7.20128	38	0.96574	0.84383	0.71182	0.49029	0.3331	0.22651	0.15527	150	7256985600	7071948242	6769558643
102032			M8-1																	43017847	0.999465	0.001795		146	27	0.476589	2.76822	3.95501	7.04525	45	0.97393	0.8971	0.78826	0.55681	0.36418	0.22786	0.1397	150	6452677050	6336163428	6111078527
102032			M8-2																	49561659	0.999518	0.001833		149	28	0.470984	2.84704	3.21738	8.93318	52	0.97536	0.9109	0.81983	0.61887	0.439	0.29911	0.1986	150	7434248850	7284663739	7020326125
102032			M8-3																	45497035	0.999524	0.001819		144	28	0.478041	2.90606	3.47542	8.48854	46	0.97357	0.89655	0.7902	0.56837	0.38336	0.24939	0.15947	150	6824555250	6677999707	6433526496
102107			D5-1																	37199059	0.999524	0.003067		248	61	0.47433	1.58257	0.00119825	5.57018	65	0.98876	0.98518	0.97532	0.85749	0.58386	0.31397	0.15066	150	5579858850	5443710328	5185868268
102107			D5-2																	39609035	0.999616	0.002575		210	51	0.453208	1.58002	0.00189124	5.34755	63	0.9881	0.98415	0.97353	0.84334	0.54755	0.276	0.13002	150	5941355250	5816531777	5574203116
102107			D5-3																	45451923	0.999626	0.002645		212	50	0.450848	1.579	0.00184085	5.58585	72	0.98779	0.98462	0.97865	0.89596	0.67463	0.40482	0.21418	150	6817788450	6674113557	6391750727
102107			D6-1																	29268739	0.999569	0.003391		243	60	0.470591	1.60918	0.000980999	5.87508	51	0.98841	0.98376	0.95572	0.70876	0.34936	0.13982	0.061745	150	4390310850	4261719895	4034458682
102107			D6-2																	44188883	0.999619	0.002679		198	44	0.439319	1.59954	0.00122868	6.38923	66	0.98731	0.98408	0.97605	0.86307	0.59901	0.32939	0.16612	150	6628332450	6487167109	6212650157
102107			D6-3																	46111692	0.999607	0.002672		217	52	0.455567	1.55861	0.00179639	5.39937	74	0.988	0.98508	0.98005	0.90733	0.70105	0.43502	0.23353	150	6916753800	6769274084	6478550418
102107			F7-1																	35282638	0.999528	0.003303		241	61	0.467277	1.57422	0.00157989	5.40587	61	0.9894	0.98588	0.97364	0.83165	0.51908	0.24589	0.1064	150	5292395700	5143920309	4875138068
102107			F7-2																	32690448	0.999479	0.003388		235	59	0.465043	1.55359	0.00199224	4.5277	56	0.98955	0.98542	0.96928	0.78765	0.43335	0.17682	0.073914	150	4903567200	4759529160	4506544096
102107			F7-3																	48559159	0.999585	0.002571		201	45	0.439597	1.54336	0.00188684	5.26864	74	0.98848	0.98532	0.9805	0.90928	0.70018	0.42119	0.21792	150	7283873850	7135123604	6842887248
102107			M8-1																	39902761	0.999567	0.002678		208	48	0.444492	1.59763	0.000721823	6.57949	62	0.98797	0.98444	0.97337	0.8324	0.53678	0.27384	0.13071	150	5985414150	5850655443	5601231424
102107			M8-2																	40329830	0.999565	0.002746		217	52	0.454037	1.58745	0.00186128	5.63331	65	0.98811	0.98492	0.97552	0.85617	0.57804	0.30652	0.14856	150	6049474500	5915353228	5660559979
102107			M8-3																	36457492	0.99949	0.002852		199	50	0.446515	1.61512	0.00125538	6.42827	55	0.98799	0.98375	0.96448	0.76313	0.4198	0.18575	0.084457	150	5468623800	5337347349	5093816877
102171	2		D5-1
102171	2		D5-2
102171	2		D5-3
102171	2		D6-1
102171	2		D6-2
102171	2		D6-3
102171	2		F7-1
102171	2		F7-2
102171	2		F7-3
102171	2		M8-1
102171	2		M8-2
102171	2		M8-3
102192			D5-1																	64388724	0.999978	0.006284		240	54	0.474431	1.41061	0.235439	2.56139	123	0.98748	0.98178	0.97786	0.96654	0.93405	0.85392	0.7162	150	9658308600	9325293620	8717438523
102192			D5-2																	66008266	0.999968	0.00662		241	54	0.474243	1.41615	0.194762	2.82478	126	0.98752	0.98186	0.97795	0.96704	0.93731	0.86464	0.73704	150	9901239900	9543863944	8903900295
102192			D5-3																	68103196	0.99997	0.006479		241	53	0.472212	1.41168	0.127493	3.51838	130	0.98754	0.98202	0.97842	0.96824	0.94139	0.87491	0.75802	150	10215479400	9846366759	9173557323
102192			D6-1																	51631083	0.998726	0.002307		196	54	0.489854	1.6199	5.28517	1.51093	83	0.97854	0.97091	0.96698	0.91367	0.74377	0.53207	0.35386	141	7284253527	7157548685	6916455430
102192			D6-2																	51329814	0.999977	0.006627		239	53	0.470878	1.40815	0.209683	2.84224	97	0.98706	0.98119	0.97634	0.95496	0.87686	0.70955	0.47525	150	7699472100	7413776258	6896723394
102192			D6-3																	61270403	0.999975	0.008982		237	54	0.465666	1.40823	0.345462	2.24964	115	0.98737	0.98123	0.97681	0.96295	0.92159	0.8225	0.65851	150	9190560450	8746364650	8002840456
102192			F7-1																	65348157	0.999978	0.005753		242	55	0.476114	1.43727	0.13747	3.12255	125	0.98842	0.98298	0.97922	0.96734	0.93259	0.85128	0.7215	150	9802223550	9491167325	8914011835
102192			F7-2																	52549014	0.999969	0.007455		230	51	0.461399	1.42705	0.170196	2.62112	97	0.98774	0.98149	0.97639	0.95195	0.86615	0.6978	0.47196	150	7882352100	7556960359	6981957935
102192			F7-3																	64375417	0.999976	0.006339		248	54	0.477385	1.45642	0.110197	3.6245	125	0.9884	0.98264	0.97843	0.96572	0.9289	0.84642	0.71688	150	9656312550	9316650437	8693868210
102192			M8-1																	65648650	0.999978	0.007655		243	55	0.473172	1.4196	0.183256	2.74055	125	0.98762	0.98223	0.97855	0.96748	0.9367	0.86156	0.73129	150	9847297500	9438960046	8730420482
102192			M8-2																	63432673	0.999974	0.005696		237	53	0.47116	1.41118	0.11222	3.53541	120	0.98744	0.9817	0.97758	0.96513	0.9285	0.8405	0.69405	150	9514900950	9219993599	8675722170
102192			M8-3																	72396807	0.999971	0.004775		244	56	0.480013	1.40874	0.127798	3.36523	140	0.9879	0.98247	0.97889	0.9697	0.9488	0.8976	0.80459	150	10859521050	10576308017	10039682414
102210			D5-1																	147883392	0.999403	0.002232		206	53	0.570393	1.44236	3.34792	0.0157257	241	0.98849	0.98654	0.9856	0.98368	0.98042	0.97285	0.95724	144	21396074870	20986619309	20211923077
102210			D5-2																	107681317	0.999433	0.002196		205	55	0.572034	1.41881	2.13709	0.174699	176	0.98843	0.98619	0.98494	0.98174	0.97268	0.9487	0.90018	144	15525981623	15225950238	14653529489
102210			D5-3																	89845678	0.999468	0.002156		207	55	0.572719	1.42289	2.39478	0.046135	147	0.98839	0.98605	0.98457	0.97941	0.96091	0.91287	0.82556	144	12975952418	12733272967	12266097725
102210			D6-1																	127909921	0.999488	0.002085		206	54	0.571177	1.44873	3.47439	0.0410526	208	0.98844	0.98637	0.98536	0.98312	0.97773	0.96418	0.93616	144	18501734915	18168375410	17516132249
102210			D6-2																	131695169	0.999425	0.00222		205	54	0.57218	1.44816	3.42755	0.013714	213	0.9885	0.98639	0.98544	0.98342	0.97867	0.96662	0.94152	144	19010744084	18642368250	17945916691
102210			D6-3																	122948984	0.999385	0.002276		208	56	0.572346	1.41898	2.26089	0.0598409	202	0.98859	0.9865	0.98552	0.98336	0.97817	0.9646	0.93618	144	17768156155	17414826616	16751152825
102210			F7-1																	158571365	0.999422	0.002125		209	53	0.566281	1.44487	3.19691	0.0519686	250	0.98956	0.98764	0.98677	0.98526	0.98283	0.9775	0.96629	145	23017475849	22599183757	21788696222
102210			F7-2																	112694959	0.999262	0.002352		224	60	0.575533	1.50262	5.25794	0.0809956	189	0.98961	0.9876	0.98653	0.98318	0.97385	0.95069	0.90603	146	16455452752	16125454426	15510183600
102210			F7-3																	115513962	0.999274	0.002318		209	54	0.568503	1.45914	3.61924	0.0212179	188	0.98939	0.98731	0.98626	0.98351	0.97603	0.95618	0.91547	144	16733791379	16404966597	15787612578
102210			M8-1																	135072513	0.999347	0.002296		207	54	0.569066	1.44671	3.22548	0.0215493	219	0.98877	0.98672	0.98575	0.9838	0.97944	0.96857	0.94594	144	19537616572	19146847823	18411525793
102210			M8-2																	89414842	0.999493	0.002058		211	56	0.572113	1.43092	2.25845	0.0616138	148	0.9887	0.98644	0.98512	0.98014	0.9617	0.91439	0.82806	144	12953302917	12722531326	12268144817
102210			M8-3																	103656881	0.999498	0.002056		209	55	0.569712	1.42568	2.05153	0.156321	171	0.98874	0.98658	0.98537	0.98213	0.97201	0.94495	0.89168	144	15011983147	14744766428	14211341502
102213			D5-1																	82830086	0.998792	0.001468		201	51	0.63515	3.12295	24.8591	0.214829	81	0.97995	0.94985	0.90116	0.76652	0.62628	0.50862	0.41693	150	12424512900	12279675265	11995997733
102213			D5-2																	81368272	0.998719	0.001449		201	50	0.631356	3.05343	23.819	0.265534	81	0.97964	0.94926	0.90046	0.76728	0.62747	0.50842	0.41475	150	12205240800	12060438923	11781892850
102213			D5-3																	91834422	0.998703	0.001421		181	39	0.619489	3.34448	25.3542	0.21805	83	0.97773	0.94638	0.89552	0.7614	0.6274	0.51601	0.42885	150	13775163300	13610334074	13306168411
102213			D6-1																	94216601	0.998615	0.001355		182	40	0.620556	3.27698	24.9603	0.211724	86	0.97812	0.94954	0.9032	0.77662	0.64523	0.53305	0.444	150	14132490150	13986827598	13698027085
102213			D6-2																	78011064	0.998758	0.001479		201	50	0.634599	3.09591	24.7904	0.198516	77	0.97984	0.94805	0.89501	0.75026	0.6039	0.48487	0.39384	150	11701659600	11564398412	11296316197
102213			D6-3																	79698109	0.998761	0.001513		200	50	0.634319	3.15951	24.786	0.220106	78	0.97979	0.94833	0.89672	0.75526	0.61088	0.49257	0.40134	150	11954716350	11806317152	11520311629
102213			F7-1																	89229980	0.998569	0.001402		179	39	0.619144	3.40882	25.3501	0.208442	79	0.9787	0.94524	0.88985	0.7483	0.61117	0.4998	0.41333	150	13384497000	13224487270	12938101512
102213			F7-2																	87639924	0.99869	0.001425		199	49	0.630778	3.12593	23.9001	0.250786	86	0.9809	0.9526	0.90732	0.78324	0.65061	0.53455	0.44086	150	13145988600	13001821360	12711639613
102213			F7-3																	89750373	0.998905	0.00144		201	51	0.63281	3.0679	23.2705	0.262482	90	0.98152	0.95434	0.91249	0.79632	0.66843	0.55378	0.45865	150	13462555950	13310042673	13013697201
102213			M8-1																	81748024	0.998675	0.001453		202	51	0.633433	3.07817	23.8474	0.228698	82	0.9802	0.95073	0.90312	0.77137	0.63196	0.51273	0.41833	150	12262203600	12116690293	11842756309
102213			M8-2																	90599914	0.998484	0.001389		177	40	0.62168	3.12288	22.6416	0.280759	85	0.97795	0.94754	0.89979	0.77237	0.64051	0.52546	0.4317	150	13589987100	13419476161	13121336536
102213			M8-3																	79012245	0.998972	0.001445		205	51	0.632449	2.91081	22.4158	0.288266	82	0.98032	0.95125	0.90481	0.7753	0.63529	0.51276	0.41458	150	11851836750	11719057688	11450605081
102234			D5-1																	42358138	0.999443	0.002296		193	51	0.489377	1.68108	10.4081	0.890889	67	0.9492	0.9401	0.92924	0.8091	0.58154	0.3674	0.2141	151	6396078838	6264965733	6043143076
102234			D5-2																	45617855	0.999473	0.002297		192	55	0.496027	1.61838	9.52408	0.80586	72	0.94922	0.94058	0.93266	0.84195	0.63872	0.42093	0.25251	151	6888296105	6738772347	6496612639
102234			D5-3																	43172394	0.999498	0.002328		209	60	0.501373	1.66935	9.57763	0.859295	72	0.95031	0.94154	0.93272	0.83578	0.63356	0.42306	0.25943	151	6519031494	6388909525	6162550562
102234			D6-1																	40412535	0.999439	0.002321		193	51	0.489497	1.63521	9.72284	0.788405	64	0.94889	0.93959	0.92779	0.79634	0.55259	0.33076	0.18107	151	6102292785	5975734200	5761379427
102234			D6-2																	44867428	0.999331	0.00247		198	54	0.493979	1.66374	10.0402	0.860342	72	0.94961	0.94071	0.93252	0.83858	0.63535	0.4234	0.25994	151	6774981628	6626547931	6378373224
102234			D6-3																	46322939	0.999396	0.002448		215	58	0.499507	1.66972	9.6634	0.885786	78	0.95102	0.94199	0.93482	0.85934	0.68488	0.48751	0.3204	151	6994763789	6847094395	6599458728
102234			F7-1																	38247378	0.999471	0.002424		203	54	0.490892	1.71109	9.75136	0.845202	62	0.95007	0.9405	0.92292	0.77261	0.52967	0.31712	0.17488	151	5775354078	5650599302	5434403024
102234			F7-2																	42378254	0.999541	0.00208		185	50	0.4881	1.65626	9.96083	0.824533	65	0.94941	0.93987	0.92561	0.79581	0.56061	0.34342	0.19252	151	6399116354	6281088414	6073784517
102234			F7-3																	40206439	0.99949	0.002266		205	55	0.493071	1.69356	9.95403	0.868275	66	0.9504	0.94117	0.92632	0.79581	0.56908	0.35915	0.20899	151	6071172289	5952385800	5746133185
102234			M8-1																	46129133	0.999551	0.002173		191	52	0.490655	1.62788	9.3422	0.78756	73	0.94938	0.94066	0.93319	0.8472	0.64726	0.42834	0.25839	151	6965499083	6817916858	6582680830
102234			M8-2																	49472180	0.999566	0.002046		184	48	0.485563	1.59933	9.24381	0.725552	76	0.94874	0.94019	0.93389	0.86362	0.67891	0.46118	0.28389	151	7470299180	7334813159	7095934332
102234			M8-3																	44057027	0.999379	0.002264		200	55	0.494449	1.63888	9.41944	0.802974	71	0.95008	0.94113	0.9328	0.83825	0.63237	0.41676	0.25013	151	6652611077	6523461208	6299601508
102249			D5-1																	71540244	0.998535	0.00325		168	35	0.592614	2.31226	10.3398	1.53566	91	0.99322	0.96914	0.92535	0.82411	0.70958	0.57902	0.44746	150	10731036600	10421058885	9932557289
102249			D5-2																	72829031	0.998449	0.003173		170	35	0.58974	2.26367	10.2975	1.51879	94	0.99329	0.97078	0.92935	0.83319	0.72403	0.59785	0.4671	150	10924354650	10624866000	10136077396
102249			D5-3																	71235506	0.998345	0.003388		164	33	0.592917	2.29353	10.2737	1.55624	90	0.99287	0.96803	0.92307	0.81907	0.70108	0.56837	0.43623	150	10685325900	10365924012	9867774992
102249			D6-1																	65406496	0.998349	0.003341		171	37	0.594126	2.30508	11.604	1.31408	84	0.99313	0.96482	0.91546	0.80835	0.68079	0.53556	0.39618	150	9810974400	9523150860	9072941665
102249			D6-2																	70916432	0.998081	0.00305		173	36	0.587996	2.25386	9.96166	1.71711	93	0.99341	0.97131	0.9299	0.83131	0.71933	0.59052	0.45827	150	10637464800	10353461027	9889566296
102249			D6-3																	72813423	0.998385	0.002885		162	33	0.597369	2.3078	10.8229	1.40444	90	0.99286	0.96709	0.92162	0.8193	0.70353	0.57268	0.44152	150	10922013450	10637340374	10170406982
102249			F7-1																	69917162	0.998294	0.003549		174	37	0.590909	2.31538	10.4068	1.54122	91	0.9932	0.96895	0.92467	0.82246	0.7068	0.57659	0.4468	150	10487574300	10170858200	9671312949
102249			F7-2																	77078301	0.998807	0.001951		176	38	0.596666	2.27315	10.2601	1.48129	102	0.99352	0.97387	0.93697	0.84749	0.74863	0.63546	0.51642	150	11561745150	11371043632	11015114223
102249			F7-3																	71814666	0.998581	0.003134		171	36	0.592619	2.33557	11.0616	1.40331	93	0.99309	0.96867	0.92482	0.82558	0.71365	0.58666	0.45847	150	10772199900	10479861946	9997816208
102249			M8-1																	69403590	0.99795	0.003138		169	36	0.594501	2.25244	9.86132	1.69912	90	0.99346	0.97017	0.92693	0.82331	0.70529	0.5715	0.4369	150	10410538500	10116765927	9654857707
102249			M8-2																	70274109	0.998303	0.002953		170	35	0.592243	2.33206	13.099	1.14723	90	0.99294	0.96485	0.91733	0.82064	0.70511	0.57025	0.43652	150	10541116350	10266735469	9816033559
102249			M8-3																	71615100	0.998311	0.002834		168	35	0.595155	2.23986	9.97844	1.60378	93	0.99339	0.97087	0.92895	0.8289	0.7154	0.58647	0.45498	150	10742265000	10471112894	10017715211
102276			D5-1																	78613226	0.999924	0.003027		182	28	0.589689	1.37648	0.380348	3.88009	123	0.98175	0.9764	0.97413	0.96669	0.94041	0.86375	0.72007	100	7861322600	7734794596	7459375170
102276			D5-2																	87781826	0.999915	0.002735		184	28	0.593669	1.38028	0.279828	4.10301	138	0.98179	0.97679	0.97475	0.96946	0.9539	0.90669	0.80734	100	8778182600	8653493075	8378461524
102276			D5-3																	86194226	0.999916	0.002928		185	29	0.594342	1.38432	0.283955	4.54349	136	0.9817	0.97684	0.97472	0.96893	0.95176	0.90077	0.79583	100	8619422600	8483981699	8186711211
102276			D6-1																	76600498	0.999912	0.002765		180	28	0.586368	1.37857	0.1227	3.8904	119	0.9814	0.9763	0.97405	0.96644	0.93721	0.85185	0.69547	100	7660049800	7548635528	7301891883
102276			D6-2																	72917088	0.999913	0.00273		179	27	0.58756	1.37801	0.822431	2.41423	114	0.98121	0.97617	0.9738	0.96519	0.92962	0.82688	0.64878	100	7291708800	7188855936	6961871365
102276			D6-3																	71302616	0.999925	0.002705		180	27	0.588349	1.36589	0.316215	2.84045	112	0.98084	0.97616	0.97382	0.96472	0.92667	0.81704	0.63051	100	7130261600	7029086692	6803144911
102276			F7-1																	81285320	0.999918	0.002856		181	28	0.588889	1.37647	0.415955	3.12964	127	0.982	0.9773	0.97519	0.96852	0.94625	0.88038	0.75102	100	8128532000	8008090250	7745210059
102276			F7-2																	75710975	0.999924	0.002781		180	28	0.584675	1.39059	0.0693919	4.64672	118	0.98191	0.97704	0.97471	0.9659	0.93257	0.83951	0.67759	100	7571097500	7460805838	7216358399
102276			F7-3																	81796065	0.999888	0.002757		164	30	0.555518	1.34867	0.977424	0.776513	120	0.98153	0.97654	0.97446	0.96778	0.94254	0.86372	0.71034	100	8179606500	8067928930	7828244708
102276			M8-1																	80163574	0.999921	0.00269		180	28	0.587309	1.36706	0.305015	3.72447	125	0.98142	0.97668	0.97452	0.96771	0.94395	0.87259	0.73522	100	8016357400	7904317996	7656182337
102276			M8-2																	79852394	0.99992	0.00268		178	27	0.584534	1.37067	0.328491	3.23973	124	0.98149	0.97649	0.97435	0.96773	0.94382	0.87091	0.73046	100	7985239400	7876168938	7636496757
102276			M8-3																	79469655	0.999921	0.002792		177	27	0.58071	1.3696	0.0819983	3.6444	123	0.98114	0.97647	0.97424	0.96725	0.94214	0.86751	0.72433	100	7946965500	7831063486	7577340050
102279	2		D5-1
102279	2		D5-2
102279	2		D5-3
102279	2		D6-1
102279	2		D6-2
102279	2		D6-3
102279	2		F7-1
102279	2		F7-2
102279	2		F7-3
102279	2		M8-1
102279	2		M8-2
102279	2		M8-3
102297			D5-1																	122434782	0.99726	0.003185		242	74	0.674089	3.35379	21.9953	0.466916	136	0.99088	0.98614	0.97321	0.89087	0.7821	0.68736	0.61061	150	18365217300	17909040268	17200054433
102297			D5-2																	109859428	0.996774	0.003438		227	70	0.665291	3.92296	22.9258	0.676629	115	0.99049	0.98241	0.94643	0.81256	0.69864	0.61484	0.54652	150	16478914200	16030414549	15352045939
102297			D5-3																	103007429	0.99703	0.003205		240	75	0.671843	4.20075	23.5186	0.586314	110	0.99076	0.98043	0.9342	0.78758	0.67667	0.59723	0.53137	150	15451114350	15065052695	14477789595
102297			D6-1																	101718736	0.996893	0.003603		235	73	0.669917	3.24283	20.3079	0.732636	113	0.99065	0.985	0.96439	0.85287	0.72899	0.62923	0.54768	150	15257810400	14839455919	14197783569
102297			D6-2																	113225514	0.997182	0.003134		226	66	0.662319	3.57669	21.3774	0.814011	122	0.99041	0.98429	0.9603	0.847	0.73224	0.64232	0.56961	150	16983827100	16575238347	15936449751
102297			D6-3																	108412547	0.997104	0.003224		229	69	0.66806	3.73852	22.3461	0.753509	117	0.99049	0.98299	0.95317	0.83014	0.71457	0.62651	0.55572	150	16261882050	15853070643	15224816965
102297			F7-1																	111695776	0.99722	0.003192		227	67	0.664573	3.535	21.9873	0.669598	119	0.99015	0.98374	0.96079	0.85139	0.73425	0.64036	0.56457	150	16754366400	16337322588	15689556649
102297			F7-2																	101819990	0.997138	0.003269		229	68	0.665705	3.49905	21.911	0.677647	110	0.99017	0.9827	0.95434	0.83179	0.70919	0.61272	0.53514	150	15272998500	14883761919	14278480229
102297			F7-3																	66468569	0.997449	0.00304		217	64	0.657776	3.41097	21.4272	0.753826	70	0.98929	0.97198	0.8941	0.69713	0.55652	0.44932	0.36084	150	9970285350	9739099500	9374509414
102297			M8-1																	128093975	0.997109	0.00309		229	68	0.661994	3.74658	21.5535	0.90369	139	0.99083	0.98521	0.96469	0.86496	0.76017	0.67746	0.61056	150	19214096250	18748064070	18023701272
102297			M8-2																	113603857	0.997037	0.003119		219	66	0.66094	3.41819	20.7698	0.809011	120	0.99043	0.98477	0.96447	0.86006	0.74347	0.64696	0.56855	150	17040578550	16626969665	15988618559
102297			M8-3																	119170261	0.996762	0.003158		220	66	0.660038	3.72019	21.8099	0.705626	124	0.9904	0.98418	0.9594	0.84496	0.73102	0.64331	0.57293	150	17875539150	17438351759	16764406311
103112			D5-1																	100373688	0.998317	0.006397		259	38	0.726951	1.62198	8.39876	0.510668	161	0.98914	0.98523	0.98254	0.96952	0.93972	0.88771	0.81194	100	10037368800	9612037312	8755572702
103112			D5-2																	113976230	0.998885	0.006103		279	42	0.730615	1.50609	4.18222	1.05834	184	0.98964	0.98621	0.98476	0.98005	0.96925	0.94528	0.90017	100	11397623000	10944761279	10006895286
103112			D5-3																	116735972	0.998315	0.006518		282	43	0.728814	1.5019	4.35384	0.797954	188	0.98955	0.98614	0.98468	0.9803	0.97074	0.94943	0.90786	100	11673597200	11181021479	10193185448
103112			D6-1																	106318662	0.998415	0.006214		263	37	0.730373	1.63265	8.361	0.560711	171	0.98914	0.9854	0.98291	0.97184	0.94656	0.90191	0.83616	100	10631866200	10195267673	9304279757
103112			D6-2																	121912154	0.998538	0.006122		285	43	0.730685	1.49377	3.72612	1.2217	197	0.98965	0.9863	0.98496	0.98105	0.9725	0.95426	0.91938	100	12191215400	11709147743	10717954467
103112			D6-3																	129127772	0.998759	0.005885		276	41	0.730409	1.4954	4.47398	0.637637	210	0.98946	0.98628	0.98514	0.982	0.97519	0.96072	0.93298	100	12912777200	12423032910	11396988153
103112			F7-1																	94136069	0.998362	0.006559		272	39	0.731859	1.75046	9.8908	0.604167	150	0.98941	0.986	0.98158	0.95979	0.91399	0.84329	0.75396	100	9413606900	9003716523	8183836691
103112			F7-2																	107845203	0.998211	0.006554		268	38	0.728934	1.66715	8.77235	0.533088	172	0.98942	0.98646	0.98385	0.97172	0.94452	0.89767	0.83103	100	10784520300	10313991088	9373054787
103112			F7-3																	133847468	0.998578	0.005854		268	40	0.724526	1.42918	2.58792	0.749242	218	0.98969	0.9873	0.98615	0.98372	0.97946	0.97021	0.95074	100	13384746800	12883980192	11838409030
103112			M8-1																	104079675	0.9982	0.006442		262	37	0.72818	1.63736	8.55421	0.565983	167	0.9892	0.98551	0.98286	0.97051	0.94224	0.89336	0.82261	100	10407967500	9960699777	9062181405
103112			M8-2																	124148006	0.998527	0.006203		279	41	0.72821	1.4835	3.59638	1.02129	201	0.98964	0.98659	0.98534	0.98179	0.97451	0.95843	0.92717	100	12414800600	11914734925	10892005460
103112			M8-3																	128580200	0.998519	0.006039		277	42	0.727255	1.45214	2.62617	1.2929	208	0.98974	0.98663	0.98545	0.98251	0.97683	0.96455	0.93949	100	12858020000	12359317390	11330537921
103122			D5-1																	67857318	0.999294	0.002997		244	37	0.524229	1.81347	13.0252	0.479967	120	0.99043	0.98849	0.98652	0.95973	0.87975	0.76156	0.63065	150	10178597700	9927832137	9514168942
103122			D5-2																	63629140	0.999343	0.002768		228	35	0.502239	1.81967	13.3678	0.454119	107	0.9901	0.98796	0.98489	0.94493	0.84017	0.69915	0.55363	150	9544371000	9328762210	8966151729
103122			D5-3																	107554015	0.999082	0.002766		227	35	0.500503	1.88324	15.396	0.595088	180	0.99032	0.9885	0.98743	0.98021	0.95211	0.89857	0.82656	150	16133102250	15769799508	15152700298
103122			D6-1																	72875485	0.999261	0.002915		229	33	0.503494	1.89396	15.1375	0.592426	122	0.99004	0.98806	0.98552	0.95404	0.87009	0.75441	0.62961	150	10931322750	10672309426	10243646169
103122			D6-2																	71844487	0.999321	0.002908		230	35	0.505411	1.87445	14.337	0.556836	121	0.99013	0.98816	0.98591	0.9569	0.87503	0.7582	0.63028	150	10776673050	10520573594	10093712159
103122			D6-3																	73053249	0.999276	0.00291		230	36	0.507893	1.86281	14.4608	0.547748	124	0.99024	0.98829	0.98607	0.95805	0.87897	0.76586	0.64161	150	10957987350	10697652394	10266309180
103122			F7-1																	58336726	0.999201	0.002949		233	36	0.507963	1.91701	14.3887	0.582197	98	0.99107	0.98873	0.98198	0.918	0.78775	0.63427	0.48983	150	8750508900	8539423498	8188487340
103122			F7-2																	73250627	0.999331	0.002778		226	33	0.498352	1.91026	14.7065	0.570909	121	0.99099	0.98884	0.98548	0.95121	0.8661	0.75037	0.62748	150	10987594050	10741584897	10328627223
103122			F7-3																	62536163	0.999278	0.002776		225	36	0.497953	1.85275	13.4677	0.476225	103	0.99092	0.98865	0.98382	0.93396	0.81919	0.67202	0.52622	150	9380424450	9167481387	8806686415
103122			M8-1																	70023037	0.999333	0.002873		231	35	0.507548	1.83544	13.7585	0.496342	120	0.99017	0.98817	0.98591	0.95682	0.87391	0.75442	0.6242	150	10503455550	10255766594	9837921217
103122			M8-2																	73797082	0.999256	0.00292		225	34	0.49984	1.85008	13.9223	0.474813	123	0.99005	0.98814	0.98597	0.9597	0.88289	0.76947	0.64332	150	11069562300	10805338757	10369077929
103122			M8-3																	68962661	0.999283	0.002858		225	34	0.500269	1.96288	16.2449	0.652844	113	0.99004	0.98787	0.98365	0.93669	0.83329	0.70524	0.57785	150	10344399150	10104729487	9709009979
103135			D5-1																	129608407	0.999469	0.002305		233	41	0.502308	2.14745	11.9364	0.592021	242	0.99932	0.99846	0.99733	0.99075	0.97141	0.93853	0.89579	150	19441261050	19056665497	18306559454
103135			D5-2																	145202016	0.999527	0.00213		229	40	0.498541	2.19486	12.5809	0.600939	250	0.99934	0.99852	0.99748	0.99172	0.97572	0.94798	0.91189	150	21780302400	21382841781	20590810457
103135			D5-3																	118291062	0.999583	0.002214		232	40	0.499775	2.10347	9.99551	0.659025	225	0.99932	0.99829	0.99675	0.98813	0.96441	0.92631	0.87831	150	17743659300	17406475805	16745012549
103135			D6-1																	104648387	0.999487	0.002425		235	42	0.502666	2.08346	9.82235	0.677344	201	0.99935	0.99824	0.99654	0.98521	0.95215	0.90425	0.8462	150	15697258050	15375182024	14750897643
103135			D6-2																	127508137	0.999514	0.002242		236	41	0.505646	2.15893	12.3292	0.670167	239	0.99935	0.99848	0.99736	0.99057	0.97064	0.9367	0.89276	150	19126220550	18758248107	18033066310
103135			D6-3																	126458419	0.999584	0.00218		230	40	0.497323	2.07375	9.24434	0.669484	240	0.99932	0.99836	0.997	0.9897	0.97016	0.93755	0.89544	150	18968762850	18613997481	17912817263
103135			F7-1																	128741718	0.999505	0.002259		234	41	0.500064	2.07908	8.52067	0.822859	248	0.99909	0.99804	0.99662	0.98923	0.9706	0.93977	0.89953	150	19311257700	18943315376	18207099784
103135			F7-2																	136294984	0.999528	0.002475		232	41	0.496542	2.06873	8.6811	0.840242	250	0.99908	0.99811	0.99678	0.99051	0.97473	0.94724	0.91106	150	20444247600	20015962066	19179322703
103135			F7-3																	124400506	0.999527	0.002203		230	39	0.49552	2.11072	9.42153	0.795749	235	0.99908	0.99793	0.99628	0.98746	0.96517	0.92965	0.88493	150	18660075900	18304636688	17603675475
103135			M8-1																	109591736	0.999601	0.002159		233	41	0.501968	2.1055	10.2273	0.654346	208	0.99926	0.99814	0.9964	0.98527	0.95595	0.91102	0.8559	150	16438760400	16132672374	15518878996
103135			M8-2																	133783438	0.999565	0.002228		232	40	0.499612	2.11434	10.6169	0.661888	250	0.99929	0.9983	0.99712	0.99071	0.97313	0.943	0.90401	150	20067515700	19678500487	18903916652
103135			M8-3																	134044097	0.999591	0.002152		232	40	0.498078	2.0403	8.4645	0.774233	250	0.99921	0.99829	0.99704	0.99077	0.97489	0.94742	0.91093	150	20106614550	19737611082	19005899322
103146			D5-1																	86108405	0.999468	0.002298		207	33	0.455952	2.03583	0.0753522	6.22283	121	0.98973	0.98482	0.97805	0.94672	0.87817	0.76827	0.63765	150	12916260750	12687333117	12202867033
103146			D5-2																	68661942	0.999361	0.002356		238	40	0.50323	1.91989	4.73632	0.575978	108	0.99048	0.98822	0.98461	0.95141	0.86287	0.72214	0.56168	150	10299291300	10121325793	9750999024
103146			D5-3																	41343194	0.999372	0.002359		211	36	0.467446	1.92644	2.09102	0.911421	60	0.98972	0.98535	0.96352	0.78373	0.50169	0.29388	0.17861	150	6201479100	6091354764	5863908502
103146			D6-1																	79578491	0.99951	0.00219		213	34	0.462428	1.98825	0.121004	5.11345	115	0.98983	0.98479	0.97743	0.94221	0.86461	0.74262	0.6031	150	11936773650	11737323504	11308073208
103146			D6-2																	77377660	0.999452	0.002273		207	34	0.462232	2.07564	3.5183	1.90362	112	0.9894	0.97836	0.96371	0.91672	0.83478	0.7164	0.58211	150	11606649000	11406321234	10985633350
103146			D6-3																	73629568	0.999381	0.002326		216	38	0.472214	1.87791	0.751075	1.67593	109	0.99028	0.98795	0.98517	0.95824	0.87533	0.73332	0.57124	150	11044435200	10852300760	10454016701
103146			F7-1																	62697296	0.999526	0.002344		213	35	0.465545	2.02705	2.06421	1.77967	91	0.99048	0.98459	0.97146	0.90276	0.76637	0.59416	0.43276	150	9404594400	9235472239	8882728808
103146			F7-2																	76837243	0.999451	0.002263		209	34	0.45992	2.05104	1.00742	3.01629	110	0.9905	0.98483	0.97529	0.93176	0.8417	0.71167	0.56906	150	11525586450	11327748685	10913280986
103146			F7-3																	61583675	0.999458	0.002289		210	35	0.460638	1.93554	0.535419	3.42083	88	0.99056	0.98795	0.98155	0.92067	0.76936	0.57606	0.40922	150	9237551250	9079594491	8748648535
103146			M8-1																	81314892	0.99944	0.002254		209	33	0.461976	2.02806	3.31997	1.6671	117	0.98982	0.98415	0.97483	0.93604	0.86238	0.75078	0.61729	150	12197233800	11989763168	11557696440
103146			M8-2																	56509383	0.999354	0.002442		212	35	0.467493	1.90223	0.839385	1.64529	83	0.99008	0.98726	0.97966	0.90838	0.73628	0.52912	0.36008	150	8476407450	8321909961	8008309985
103146			M8-3																	62892406	0.999393	0.002361		212	36	0.466627	1.902	0.686066	2.31234	91	0.99007	0.98761	0.98268	0.93315	0.79728	0.60872	0.43561	150	9433860900	9265326486	8919936286
105001			D5-1																	65942127	0.998976	0.002745		187	53	0.481244	2.24935	3.34532	5.69344	83	0.96401	0.94753	0.92693	0.84658	0.7011	0.53105	0.38165	151	9957261177	9712736238	9307615377
105001			D5-2																	63696059	0.998771	0.002872		186	52	0.481125	2.25115	3.72937	5.33459	80	0.96418	0.94718	0.92544	0.8383	0.68255	0.50711	0.35768	151	9618104909	9377177522	8977111777
105001			D5-3																	59861886	0.999101	0.002637		188	52	0.481953	2.25324	3.79182	5.54841	76	0.96428	0.94667	0.92272	0.82295	0.65084	0.46801	0.3206	151	9039144786	8831353353	8475734341
105001			D6-1																	75869770	0.998737	0.002837		187	56	0.4824	2.13978	2.80273	4.67939	98	0.96529	0.95188	0.93801	0.88167	0.77578	0.63358	0.48826	151	11456335270	11152463814	10667977236
105001			D6-2																	63470469	0.998913	0.002947		188	55	0.480907	2.19218	2.69991	5.15057	81	0.96428	0.94829	0.92686	0.84061	0.68783	0.51398	0.36521	151	9584040819	9328682305	8913391790
105001			D6-3																	69315064	0.998854	0.002944		193	54	0.476208	2.19594	2.54789	5.17031	91	0.96542	0.94918	0.93107	0.86534	0.74283	0.58733	0.43816	151	10466574664	10195226478	9745185278
105001			F7-1																	46335147	0.998981	0.002613		168	50	0.484307	2.27355	3.96977	5.22503	54	0.96214	0.94158	0.8946	0.68439	0.43466	0.25701	0.1524	151	6996607197	6818793700	6529801736
105001			F7-2																	62725518	0.998718	0.002922		177	48	0.474069	2.24836	3.32485	5.35531	76	0.96358	0.94616	0.92236	0.82064	0.64948	0.46988	0.32527	151	9471553218	9213707037	8802631368
105001			F7-3																	63599313	0.999052	0.002807		193	54	0.478256	2.25504	3.31225	5.51374	82	0.96583	0.94829	0.92599	0.83936	0.69019	0.51879	0.37043	151	9603496263	9356589160	8959705205
105001			M8-1																	53860063	0.999023	0.00276		191	54	0.480694	2.25155	2.40217	6.6125	69	0.9639	0.94223	0.9119	0.78891	0.59371	0.40627	0.26788	151	8132869513	7930030559	7593783791
105001			M8-2																	68078339	0.998987	0.002796		191	53	0.478508	2.20247	2.86607	5.23521	88	0.96544	0.94864	0.92958	0.85932	0.72924	0.56862	0.41847	151	10279829189	10028065541	9602621945
105001			M8-3																	61818993	0.998871	0.003166		189	53	0.476883	2.21704	3.09473	5.08341	79	0.96455	0.9467	0.92398	0.83401	0.67473	0.49739	0.34875	151	9334667943	9059817396	8636864650
105343			D5-1																	63272586	0.999277	0.00224		239	34	0.613835	2.08008	10.969	1.87093	82	0.97982	0.96344	0.93379	0.82803	0.67781	0.52106	0.38467	150	9490887900	9320902712	8997023804
105343			D5-2																	70767031	0.999393	0.002032		239	36	0.615884	2.15065	11.7458	1.71641	92	0.98029	0.96539	0.94005	0.8512	0.72293	0.58312	0.4537	150	10615054650	10448313831	10123188402
105343			D5-3																	63568917	0.999403	0.001966		224	31	0.594151	2.21538	13.1768	1.3837	78	0.97924	0.96069	0.92539	0.8043	0.6448	0.49013	0.36153	150	9535337550	9390679855	9112024803
105343			D6-1																	72995656	0.999406	0.002049		228	33	0.599377	2.15676	12.4794	1.51556	91	0.97995	0.9653	0.93918	0.84832	0.71768	0.57779	0.44968	150	10949348400	10775400922	10438657171
105343			D6-2																	56942294	0.999448	0.001972		236	34	0.61355	2.20995	13.0136	1.37911	73	0.97975	0.95958	0.92002	0.78265	0.60922	0.44872	0.32098	150	8541344100	8412660938	8161936225
105343			D6-3																	65306301	0.999396	0.002044		237	35	0.613976	2.19745	13.35	1.30272	83	0.9801	0.96376	0.93308	0.82478	0.67587	0.52585	0.39662	150	9795945150	9640003911	9341692416
105343			F7-1																	54691248	0.999499	0.001977		222	32	0.591607	2.21289	12.1729	1.67154	67	0.98018	0.95665	0.90972	0.75246	0.56545	0.40075	0.27601	150	8203687200	8078531391	7835431982
105343			F7-2																	53505869	0.99922	0.002179		228	32	0.597743	2.38819	18.7241	0.473566	65	0.98039	0.95377	0.89732	0.72703	0.54772	0.40164	0.2919	150	8025880350	7896962936	7649377509
105343			F7-3																	60647103	0.999474	0.001899		215	29	0.578821	2.21734	13.0459	1.47859	73	0.97984	0.95828	0.91547	0.776	0.60533	0.44842	0.32251	150	9097065450	8967171678	8714113020
105343			M8-1																	51587412	0.999413	0.002095		235	34	0.609895	2.15552	11.8116	1.74388	66	0.97939	0.9565	0.91007	0.75125	0.55876	0.39035	0.26484	150	7738111800	7611272251	7368555303
105343			M8-2																	61720175	0.999364	0.001965		217	30	0.582889	2.27171	13.1692	1.48587	74	0.97883	0.95776	0.91631	0.78152	0.61511	0.46001	0.33414	150	9258026250	9118883831	8851032249
105343			M8-3																	68564197	0.999364	0.002152		231	34	0.60539	2.17743	12.9772	1.37668	86	0.97999	0.96434	0.93537	0.83391	0.69226	0.54569	0.41673	150	10284629550	10111304050	9780325452
106002			D5-1																	92822457	0.999979	0.003331		189	35	0.504526	2.63795	6.3827	3.98357	93	0.94617	0.8951	0.88058	0.82036	0.71075	0.58308	0.46546	150	13923368550	13590820782	12902649301
106002			D5-2																	103599463	0.999982	0.002999		183	33	0.503977	2.6527	6.85506	3.27973	102	0.95297	0.89571	0.88299	0.83368	0.74288	0.62857	0.51541	150	15539919450	15211904512	14522923234
106002			D5-3																	55771206	0.99998	0.003813		187	34	0.502237	2.70258	5.37261	5.50687	56	0.93385	0.8846	0.84128	0.66232	0.46522	0.31628	0.21373	150	8365680900	8127840554	7650657589
106002			D6-1																	98881236	0.999984	0.003499		189	37	0.510119	2.66422	5.22298	5.60344	101	0.94624	0.89591	0.88263	0.83023	0.73427	0.61849	0.50688	150	14832185400	14447860224	13659897461
106002			D6-2																	111055015	0.999979	0.003225		185	34	0.506415	2.61199	5.49796	4.8012	112	0.94822	0.89668	0.88559	0.84474	0.76782	0.66592	0.56077	150	16658252250	16265922860	15450174890
106002			D6-3																	109344570	0.999982	0.003108		190	35	0.50651	2.63184	5.41981	5.22217	112	0.95161	0.89695	0.88584	0.84528	0.76779	0.66609	0.56057	150	16401685500	16036468288	15269703127
106002			F7-1																	94342770	0.999979	0.003529		187	35	0.500969	2.65686	5.253	5.18149	94	0.94821	0.89583	0.88144	0.82206	0.71441	0.58906	0.4723	150	14151415500	13780927518	13022289360
106002			F7-2																	78418251	0.999982	0.003403		186	34	0.49882	2.64298	5.34354	5.11231	78	0.94336	0.89288	0.87242	0.78033	0.63495	0.49008	0.37082	150	11762737650	11465720287	10854908416
106002			F7-3																	84764102	0.999984	0.003883		184	34	0.498799	2.64793	5.04603	5.68306	84	0.94321	0.89391	0.87563	0.79604	0.66661	0.53027	0.41221	150	12714615300	12341330695	11604331096
106002			M8-1																	93079809	0.999985	0.003481		188	34	0.501276	2.68143	5.01879	6.42651	94	0.94638	0.89466	0.87904	0.81442	0.7048	0.58162	0.46968	150	13961971350	13601161722	12861230718
106002			M8-2																	104753766	0.999979	0.003175		186	35	0.504874	2.63881	5.43773	5.09162	105	0.9483	0.89635	0.88408	0.83725	0.74951	0.63898	0.52933	150	15713064900	15351448579	14596183774
106002			M8-3																	97926305	0.999985	0.004016		185	33	0.497356	2.62802	5.32989	5.33644	98	0.94545	0.89509	0.88108	0.82394	0.72233	0.60277	0.48999	150	14688945750	14242543789	13366658542
106416			D5-1																	50271483	0.999565	0.002403		237	52	0.497505	1.41759	0.703568	0.748398	103	0.98708	0.98279	0.98026	0.96707	0.90216	0.75559	0.54231	150	7540722450	7396389381	7113077885
106416			D5-2																	24811551	0.9996	0.002357		233	48	0.48847	1.45301	0.145729	3.86454	50	0.98583	0.97936	0.95901	0.72018	0.31006	0.094093	0.029322	150	3721732650	3650321155	3507465067
106416			D5-3																	46970831	0.999591	0.002265		229	46	0.485488	1.40363	0.509473	1.33262	94	0.9865	0.98205	0.97942	0.96051	0.87063	0.68245	0.43952	150	7045624650	6918109190	6664383471
106416			D6-1																	35603401	0.999517	0.002505		241	53	0.498185	1.44393	0.198123	2.89489	73	0.98683	0.98165	0.9764	0.91292	0.70633	0.40606	0.18439	150	5340510150	5233657864	5026146366
106416			D6-2																	47420119	0.999516	0.002494		233	48	0.49002	1.40993	0.795655	0.774147	96	0.9866	0.9823	0.9797	0.96247	0.87875	0.70016	0.46232	150	7113017850	6971150049	6698958368
106416			D6-3																	41585840	0.999525	0.002712		242	54	0.501433	1.42697	0.352184	1.06069	86	0.98708	0.9823	0.97895	0.94873	0.82463	0.5892	0.3353	150	6237876000	6110510194	5862941085
106416			F7-1																	46254384	0.99955	0.00246		232	48	0.487979	1.43053	0.492096	0.91126	94	0.98741	0.98302	0.9801	0.95643	0.85712	0.66918	0.4321	150	6938157600	6801174275	6534419076
106416			F7-2																	43477926	0.999561	0.002383		241	52	0.498111	1.45906	0.226103	1.92751	90	0.98777	0.98319	0.97963	0.94875	0.83267	0.62517	0.38101	150	6521688900	6398433034	6156902573
106416			F7-3																	45913857	0.999588	0.002531		231	48	0.487843	1.44052	0.726625	0.728589	93	0.98746	0.98296	0.97992	0.95604	0.85449	0.66145	0.42187	150	6887078550	6755219655	6493941371
106416			M8-1																	42086999	0.999571	0.002266		233	49	0.489506	1.40939	0.283374	1.88781	85	0.98682	0.9822	0.97872	0.94669	0.81698	0.57732	0.32135	150	6313049850	6198906552	5970465137
106416			M8-2																	45140424	0.999569	0.002565		231	47	0.48762	1.41622	0.634356	0.840052	91	0.98676	0.98226	0.97935	0.95757	0.85629	0.65	0.39968	150	6771063600	6639116252	6377937095
106416			M8-3																	42679475	0.999569	0.002454		232	48	0.48895	1.40543	0.42304	1.22187	86	0.98648	0.98217	0.97883	0.95045	0.82731	0.59377	0.33661	150	6401921250	6283387008	6046959854
112061			D5-1																	57943768	0.998797	0.002663		187	58	0.513175	1.51221	8.17545	0.510742	99	0.9875	0.98307	0.98082	0.96263	0.87542	0.7027	0.49634	150	8691565200	8480550054	8140173853
112061			D5-2																	56349298	0.998633	0.002686		185	58	0.514905	1.54687	9.05115	0.655825	95	0.98821	0.98363	0.98088	0.95248	0.84394	0.65949	0.45722	150	8452394700	8216978767	7886053664
112061			D5-3																	94243543	0.998952	0.002446		181	56	0.513357	1.50769	9.08945	0.566909	158	0.98789	0.9837	0.98209	0.97887	0.96737	0.92975	0.8551	150	14136531450	13815784402	13289108402
112061			D6-1																	55483016	0.998953	0.002363		163	49	0.507722	1.50087	8.3405	0.464606	87	0.98656	0.98156	0.97871	0.94906	0.81714	0.58706	0.3578	150	8322452400	8131605963	7821858059
112061			D6-2																	83383102	0.998915	0.002429		184	57	0.513316	1.5174	8.23215	0.549903	142	0.98876	0.98453	0.98278	0.9777	0.95528	0.89511	0.79354	150	12507465300	12226508717	11756086120
112061			D6-3																	70215792	0.99896	0.002523		184	57	0.514425	1.50638	8.7495	0.516491	119	0.9875	0.98325	0.9813	0.97303	0.92961	0.82394	0.66779	150	10532368800	10292212621	9897754300
112061			F7-1																	65877586	0.99889	0.002607		184	58	0.51386	1.53924	8.65306	0.582478	112	0.98851	0.984	0.98191	0.96822	0.90651	0.77955	0.60934	150	9881637900	9608098319	9222728159
112061			F7-2																	59659601	0.998875	0.002462		176	55	0.513019	1.51403	8.80238	0.570998	98	0.9871	0.98253	0.9802	0.96126	0.87213	0.69471	0.48523	150	8948940150	8743580197	8407605118
112061			F7-3																	61771327	0.999098	0.002559		178	55	0.509504	1.5258	9.04249	0.545531	102	0.98723	0.98269	0.98042	0.96426	0.88601	0.7257	0.52735	150	9265699050	9043443454	8684624521
112061			M8-1																	69449774	0.998783	0.002733		183	57	0.513211	1.50061	8.48068	0.512839	118	0.9876	0.98335	0.98148	0.97293	0.9277	0.81899	0.65801	150	10417466100	10149620593	9720621246
112061			M8-2																	55951638	0.998856	0.002692		182	57	0.513997	1.53074	9.0795	0.597313	94	0.9873	0.98268	0.98012	0.95573	0.84819	0.6543	0.44282	150	8392745700	8168268937	7833360503
112061			M8-3																	66214624	0.998732	0.002541		182	56	0.512535	1.48992	8.17799	0.515835	112	0.98757	0.98321	0.98122	0.97095	0.91701	0.79085	0.61215	150	9932193600	9671142200	9289076484
112120			D5-1																	90089342	0.99865	0.002736		210	59	0.582648	1.42983	1.65125	0.378748	141	0.98894	0.98545	0.98396	0.97955	0.96185	0.90956	0.81193	150	13513401300	13215013756	12714287212
112120			D5-2																	73616399	0.998627	0.002782		231	68	0.592156	1.44757	2.26601	0.199732	121	0.98938	0.98581	0.98413	0.97591	0.93714	0.84266	0.69501	150	11042459850	10798764237	10380921505
112120			D5-3																	77102102	0.998594	0.002698		239	72	0.599177	1.45869	2.18691	0.249091	129	0.98967	0.98617	0.98462	0.97795	0.94748	0.86941	0.74225	150	11565315300	11326749948	10907210015
112120			D6-1																	80575159	0.998599	0.002705		236	70	0.596365	1.44302	1.68012	0.449611	134	0.98957	0.98612	0.98461	0.97906	0.95506	0.88925	0.77565	150	12086273850	11836259572	11394097787
112120			D6-2																	74805155	0.998757	0.002884		235	71	0.597883	1.45151	1.81015	0.380362	124	0.98958	0.98605	0.98437	0.97666	0.94155	0.85383	0.7133	150	11220773250	10968160324	10545120737
112120			D6-3																	64006641	0.998338	0.002221		225	71	0.601207	1.44534	1.74575	0.402966	104	0.98908	0.98548	0.98325	0.96665	0.89505	0.74745	0.54417	150	9600996150	9435593316	9132619602
112120			F7-1																	80999916	0.998729	0.002691		226	66	0.591377	1.4599	1.80003	0.352885	132	0.99023	0.98681	0.98525	0.97824	0.94862	0.87467	0.75588	150	12149987400	11884343118	11444398414
112120			F7-2																	72197373	0.998667	0.002801		230	68	0.592861	1.46669	1.87963	0.360715	118	0.99022	0.98679	0.98494	0.9737	0.92627	0.82145	0.66878	150	10829605950	10584473213	10180798555
112120			F7-3																	72464479	0.998804	0.002071		215	67	0.596756	1.45754	1.29355	0.711534	115	0.98987	0.98639	0.98448	0.97244	0.9216	0.80895	0.64631	150	10869671850	10705385145	10387651825
112120			M8-1																	79387217	0.998277	0.002774		233	69	0.594473	1.44107	1.82564	0.388832	131	0.98962	0.98625	0.98468	0.97865	0.95152	0.87901	0.75714	150	11908082550	11652323074	11213051222
112120			M8-2																	58486930	0.998773	0.002014		221	68	0.599259	1.44273	1.22962	1.00876	94	0.98895	0.9854	0.98285	0.95914	0.8598	0.66969	0.43445	150	8773039500	8641453829	8383220711
112120			M8-3																	70731489	0.998656	0.002078		214	67	0.596951	1.43693	1.53891	0.559006	112	0.98906	0.98563	0.98368	0.97243	0.92129	0.80251	0.6258	150	10609723350	10444989911	10131189043
112178			D5-1																	42315230	0.99792	0.003232		271	82	0.535241	1.82512	0.283428	3.42924	69	0.99113	0.97953	0.95909	0.841	0.61509	0.39238	0.23921	150	6347284500	6178090162	5906877916
112178			D5-2																	43338214	0.998474	0.002766		253	72	0.527771	1.79864	0.393659	3.25443	69	0.99058	0.97996	0.96127	0.84597	0.61499	0.38959	0.23736	150	6500732100	6349779544	6097812157
112178			D5-3																	45687745	0.998351	0.002877		259	74	0.530266	1.79343	0.394789	3.24928	74	0.99089	0.98099	0.96429	0.86706	0.66039	0.43902	0.27567	150	6853161750	6688627729	6414469875
112178			D6-1																	42386111	0.997756	0.003373		270	86	0.534314	1.8222	0.319436	3.41226	69	0.99138	0.97901	0.95873	0.84107	0.61535	0.39201	0.23818	150	6357916650	6179663111	5900009523
112178			D6-2																	44681825	0.998362	0.00285		258	74	0.52967	1.78724	0.511118	3.11745	72	0.99115	0.9808	0.96386	0.86089	0.64702	0.42269	0.26185	150	6702273750	6541081171	6275714592
112178			D6-3																	47820482	0.998305	0.002896		252	71	0.527993	1.79346	0.763441	2.59123	76	0.9907	0.98305	0.96991	0.88401	0.68937	0.46776	0.29804	150	7173072300	6997650616	6710376882
112178			F7-1																	41210748	0.998014	0.003224		271	86	0.533998	1.85047	0.357659	3.44379	67	0.99213	0.97921	0.95592	0.8233	0.58894	0.36892	0.22168	150	6181612200	6018319077	5756221130
112178			F7-2																	44383980	0.998225	0.002976		269	78	0.533194	1.82805	0.598245	3.0932	72	0.99195	0.98123	0.96281	0.85555	0.64601	0.4272	0.26656	150	6657597000	6492530396	6221085689
112178			F7-3																	51815982	0.998393	0.002779		258	74	0.529178	1.81161	0.772777	2.65859	83	0.9921	0.98494	0.97324	0.90235	0.73987	0.53611	0.36039	150	7772397300	7591525285	7290061839
112178			M8-1																	36699924	0.997455	0.003653		294	101	0.544573	1.85102	0.285989	3.41745	61	0.99167	0.97625	0.9479	0.78417	0.52196	0.30493	0.17458	150	5504988600	5342162329	5093278935
112178			M8-2																	49601327	0.998374	0.002851		261	75	0.531981	1.8089	0.525638	2.88315	80	0.99107	0.98326	0.97078	0.89581	0.72116	0.5078	0.33364	150	7440199050	7263194307	6967590029
112178			M8-3																	49237781	0.998236	0.002917		260	75	0.531741	1.79298	0.578924	2.79835	80	0.99109	0.98344	0.97094	0.89368	0.7153	0.50016	0.32592	150	7385667150	7206046552	6910140655
113089			D5-1																	83629825	0.999121	0.002608		204	50	0.669969	2.07145	11.4763	0.00139467	107	0.98807	0.98122	0.96584	0.89011	0.78221	0.66476	0.54479	150	12544473750	12276567504	11817133136
113089			D5-2																	74621193	0.999282	0.002653		219	53	0.67063	1.87836	7.33453	0.0174254	102	0.98849	0.98275	0.97077	0.89963	0.78609	0.65507	0.51899	150	11193178950	10957462024	10534818782
113089			D5-3																	77155978	0.999237	0.002576		224	55	0.676068	1.86809	7.35094	0.0280069	107	0.98862	0.98326	0.97285	0.90989	0.80304	0.67778	0.547	150	11573396700	11342837078	10924773186
113089			D6-1																	82663204	0.99923	0.002533		218	57	0.678619	1.87166	6.2848	0.0390726	113	0.9887	0.98363	0.97469	0.91877	0.82226	0.70673	0.58326	150	12399480600	12149268451	11697162439
113089			D6-2																	72466619	0.99913	0.002689		214	51	0.668903	1.90847	7.48782	0.0273272	98	0.98826	0.98195	0.96781	0.88813	0.76831	0.63239	0.49171	150	10869992850	10639940231	10235764351
113089			D6-3																	70150887	0.999062	0.002752		221	53	0.671182	1.85879	7.29172	0.022136	96	0.98847	0.98236	0.96851	0.88806	0.76358	0.62211	0.47779	150	10522633050	10293086604	9892383891
113089			F7-1																	80392510	0.99928	0.002632		223	53	0.672341	1.87988	7.11611	0.0252737	111	0.98948	0.98427	0.9743	0.91515	0.81439	0.69462	0.56931	150	12058876500	11810965034	11367257519
113089			F7-2																	74341164	0.999275	0.002678		223	54	0.674091	1.88341	7.16192	0.0197631	102	0.98952	0.98379	0.97149	0.90034	0.78549	0.65273	0.51771	150	11151174600	10916834283	10499951862
113089			F7-3																	74572557	0.999271	0.002604		223	54	0.673485	1.92001	7.77835	0.0102166	102	0.98947	0.98365	0.97107	0.89914	0.78403	0.65166	0.51755	150	11185883550	10962403897	10557882376
113089			M8-1																	81236899	0.99922	0.002519		216	52	0.669682	1.85514	6.44175	0.031958	111	0.98864	0.98348	0.97386	0.91494	0.81564	0.69794	0.57189	150	12185534850	11943670087	11503935873
113089			M8-2																	70575126	0.999195	0.002517		213	51	0.670351	2.03135	10.7933	0.00345731	93	0.98818	0.98013	0.95976	0.86364	0.733	0.59359	0.45625	150	10586268900	10375991180	9999619517
113089			M8-3																	74639672	0.999312	0.002545		226	55	0.674374	1.83612	6.46228	0.0374224	104	0.98884	0.98359	0.97313	0.90801	0.79748	0.66665	0.53042	150	11195950800	10973847836	10570826015
113267	2		D5-1
113267	2		D5-2
113267	2		D5-3
113267	2		D6-1
113267	2		D6-2
113267	2		D6-3
113267	2		F7-1
113267	2		F7-2
113267	2		F7-3
113267	2		M8-1
113267	2		M8-2
113267	2		M8-3
114091			D5-1																	65345391	0.999202	0.002815		184	56	0.501601	1.44027	6.52154	0.375867	111	0.98651	0.98203	0.97995	0.97097	0.92252	0.79914	0.61292	150	9801808650	9519760409	9080734239
114091			D5-2																	77408253	0.998784	0.002935		187	57	0.504601	1.43784	6.48338	0.379148	132	0.98685	0.98252	0.98069	0.97611	0.9549	0.88997	0.76934	150	11611237950	11292444911	10773046416
114091			D5-3																	80148010	0.998867	0.002841		186	57	0.506029	1.44882	6.79712	0.385353	136	0.98646	0.98255	0.98075	0.97649	0.95752	0.8985	0.78776	150	12022201500	11672852425	11136193922
114091			D6-1																	69256443	0.998836	0.002825		187	57	0.505511	1.447	6.61268	0.423875	118	0.98673	0.98229	0.98027	0.97343	0.93718	0.83787	0.67582	150	10388466450	10110025027	9654202147
114091			D6-2																	66411108	0.998672	0.002833		184	57	0.502952	1.44628	6.0804	0.392664	112	0.98621	0.98205	0.97994	0.9715	0.92642	0.808	0.62441	150	9961666200	9673387120	9228369815
114091			D6-3																	71422427	0.998765	0.002879		188	58	0.507301	1.45261	7.06593	0.437302	122	0.98646	0.98237	0.9804	0.97398	0.94096	0.85022	0.70102	150	10713364050	10399187595	9917603786
114091			F7-1																	64940763	0.998746	0.002957		186	57	0.503931	1.47133	6.78973	0.470579	110	0.98754	0.98288	0.98063	0.96847	0.91123	0.78408	0.60244	150	9741114450	9449299044	9005215171
114091			F7-2																	62816970	0.998813	0.002885		185	57	0.504812	1.47385	6.70935	0.431206	106	0.9874	0.98284	0.98057	0.96647	0.90108	0.76143	0.56945	150	9422545500	9134162377	8714006233
114091			F7-3																	73581905	0.99881	0.002772		184	57	0.505154	1.48325	7.13064	0.480002	124	0.98714	0.98303	0.981	0.97341	0.93736	0.84838	0.70687	150	11037285750	10742356647	10257899842
114091			M8-1																	66313344	0.998857	0.00304		189	58	0.504728	1.44582	6.27546	0.359209	114	0.9869	0.98255	0.98048	0.97242	0.92878	0.81574	0.63916	150	9947001600	9661469424	9200259636
114091			M8-2																	66253512	0.998662	0.002878		190	59	0.507262	1.45148	6.62458	0.407152	114	0.98655	0.98256	0.98051	0.97199	0.92676	0.81235	0.63874	150	9938026800	9656740152	9209481329
114091			M8-3																	93234549	0.998913	0.002766		187	58	0.506245	1.44161	6.71971	0.37643	159	0.98687	0.98313	0.98145	0.97844	0.96956	0.9391	0.87294	150	13985182350	13610599917	13001617735
114132			D5-1																	65003956	0.999381	0.002124		199	62	0.511194	1.54435	7.29184	0.11605	120	0.99014	0.98587	0.98253	0.96565	0.91128	0.80497	0.66077	151	9815597356	9612418951	9277395308
114132			D5-2																	63936537	0.999407	0.002192		191	58	0.50631	1.52776	7.40764	0.0888262	115	0.9898	0.98536	0.98187	0.96315	0.90221	0.78459	0.62782	151	9654417087	9457426987	9106271364
114132			D5-3																	55427600	0.999467	0.002094		196	60	0.509736	1.54939	7.68672	0.100698	101	0.98976	0.98507	0.98046	0.94978	0.85525	0.69741	0.51101	151	8369567600	8213330177	7928750480
114132			D6-1																	67669485	0.999347	0.002121		192	57	0.50534	1.56981	8.77832	0.123087	121	0.9899	0.98541	0.98199	0.9639	0.90886	0.80471	0.66654	151	10218092235	10022299784	9669989319
114132			D6-2																	62839228	0.999465	0.002056		191	58	0.507388	1.5384	7.38352	0.0903406	113	0.98983	0.98538	0.98177	0.96201	0.89781	0.77504	0.61391	151	9488723428	9312480584	8994079337
114132			D6-3																	58575843	0.999425	0.002172		200	62	0.512105	1.55018	7.58059	0.118438	108	0.99002	0.98548	0.98155	0.95733	0.88061	0.74468	0.57498	151	8844952293	8675845663	8368375543
114132			F7-1																	71055890	0.999478	0.002001		183	55	0.502031	1.54614	7.38259	0.0842184	124	0.9906	0.98616	0.98286	0.9653	0.91483	0.81821	0.68446	151	10729439390	10528968301	10171237255
114132			F7-2																	76489738	0.999387	0.002067		193	58	0.505935	1.58033	7.99195	0.0910943	137	0.99095	0.98678	0.98388	0.96997	0.93113	0.85519	0.74638	151	11549950438	11341076994	10956147196
114132			F7-3																	62479662	0.999476	0.001936		168	48	0.496105	1.52697	7.32405	0.0779879	103	0.98987	0.9849	0.98018	0.9499	0.86452	0.71612	0.53032	151	9434428962	9261119352	8949336380
114132			M8-1																	67676798	0.999458	0.002077		199	61	0.510769	1.55671	7.63373	0.113056	124	0.99019	0.98599	0.98283	0.96752	0.91913	0.82196	0.68848	151	10219196498	10031143860	9686994250
114132			M8-2																	65993882	0.999472	0.00207		193	59	0.508586	1.53346	7.30899	0.0934294	119	0.98999	0.98565	0.98238	0.96574	0.91184	0.80506	0.65977	151	9965076182	9782213755	9448590517
114132			M8-3																	63464723	0.99945	0.002105		191	58	0.50674	1.53403	7.46738	0.083995	114	0.9898	0.98543	0.98182	0.96202	0.89934	0.77927	0.62102	151	9583173173	9378456347	9049306718
114139			D5-1																	197977211	0.999544	0.003603		305	44	0.744724	1.63588	6.47754	1.49707	250	0.99016	0.98711	0.98615	0.98384	0.97969	0.97253	0.96119	100	19797721100	19308913661	18038163925
114139			D5-2																	180894860	0.99954	0.003849		317	48	0.740791	1.54552	3.12925	2.63256	250	0.99034	0.9873	0.9863	0.98406	0.98037	0.97434	0.96433	100	18089486000	17625183343	16432934664
114139			D5-3																	176108414	0.999504	0.004144		319	48	0.73946	1.55603	3.39554	2.61228	250	0.99051	0.98731	0.98623	0.98379	0.97972	0.97284	0.96153	100	17610841400	17098607933	15820958833
114139			D6-1																	264554907	0.999488	0.003681		309	43	0.74409	1.62454	6.64492	1.51821	250	0.99049	0.98751	0.98665	0.98519	0.98297	0.97959	0.97462	100	26455490700	25774647304	24023102091
114139			D6-2																	157687344	0.999553	0.003722		307	44	0.743258	1.65725	6.43238	1.79444	250	0.99013	0.98684	0.98555	0.98149	0.97322	0.95838	0.93495	100	15768734400	15362090455	14311123339
114139			D6-3																	148066731	0.999499	0.003916		316	48	0.739913	1.54853	3.34737	2.40123	239	0.9903	0.98706	0.98583	0.9827	0.97675	0.96558	0.9456	100	14806673100	14414118856	13417465473
114139			F7-1																	169007512	0.999511	0.003752		308	44	0.744833	1.66799	6.77004	1.47824	250	0.99035	0.988	0.98683	0.98337	0.97647	0.96419	0.94473	100	16900751200	16463140393	15344374470
114139			F7-2																	188663191	0.999562	0.003631		301	43	0.744092	1.61983	5.74602	1.7654	250	0.99028	0.98805	0.98703	0.98451	0.98008	0.9724	0.96008	100	18866319100	18393974841	17163244907
114139			F7-3																	131982771	0.999553	0.003967		319	47	0.740446	1.58422	4.08592	2.04719	211	0.99062	0.98806	0.98657	0.98229	0.97324	0.95494	0.92256	100	13198277100	12844177901	11942700342
114139			M8-1																	212483118	0.999585	0.003783		312	44	0.745927	1.70163	8.10928	1.03249	250	0.99044	0.98756	0.98658	0.98418	0.97993	0.97276	0.9617	100	21248311800	20687986588	19261065018
114139			M8-2																	173051342	0.999537	0.004115		321	48	0.739099	1.56862	3.45253	2.60522	250	0.99054	0.98751	0.98644	0.98387	0.97958	0.97204	0.9593	100	17305134200	16805451692	15557290671
114139			M8-3																	161817763	0.999567	0.003804		316	47	0.741438	1.54544	3.43092	2.23203	250	0.99041	0.98736	0.98627	0.98364	0.97907	0.97089	0.95645	100	16181776300	15773946650	14723803640
114278			D5-1																	119396027	0.99906	0.004368		276	41	0.737496	1.56992	6.69227	0.635549	194	0.98973	0.98619	0.98467	0.97939	0.96701	0.94163	0.89749	100	11939602700	11529586166	10561984299
114278			D5-2																	129992492	0.999174	0.004401		296	46	0.730209	1.43842	1.79525	1.11291	213	0.99032	0.98691	0.98575	0.98322	0.97851	0.96762	0.94455	100	12999249200	12567364894	11535626249
114278			D5-3																	114037462	0.999164	0.004481		292	45	0.72763	1.43561	1.36228	1.23353	187	0.9901	0.98665	0.98536	0.9822	0.97525	0.95717	0.91975	100	11403746200	11012902407	10083092100
114278			D6-1																	97626854	0.999016	0.00434		277	40	0.740023	1.59483	6.97663	0.592688	159	0.98958	0.98588	0.98377	0.97433	0.94963	0.89984	0.82131	100	9762685400	9433200083	8656691643
114278			D6-2																	122101632	0.999168	0.004445		296	47	0.729193	1.43343	1.99283	0.671021	200	0.99023	0.98686	0.98576	0.98326	0.97815	0.96486	0.93604	100	12210163200	11798750973	10820623463
114278			D6-3																	115906511	0.998925	0.004589		299	47	0.729556	1.44098	2.09289	0.838154	190	0.99021	0.98683	0.9856	0.98271	0.97595	0.95836	0.92173	100	11590651100	11186490333	10242451909
114278			F7-1																	119049595	0.999068	0.004143		273	42	0.737654	1.60293	7.85297	0.400178	193	0.98971	0.9871	0.98556	0.97965	0.96539	0.93648	0.88864	100	11904959500	11524602240	10610358596
114278			F7-2																	108236052	0.999077	0.004487		275	40	0.735487	1.60439	7.23873	0.591362	175	0.98966	0.98695	0.9851	0.97745	0.9579	0.91878	0.85646	100	10823605200	10440073842	9543311109
114278			F7-3																	119528252	0.999155	0.004558		298	47	0.726472	1.43786	1.52938	0.928015	195	0.9905	0.98794	0.98666	0.98396	0.97833	0.96323	0.93055	100	11952825200	11533958981	10545902924
114278			M8-1																	125211481	0.998982	0.004497		273	41	0.734306	1.55522	6.53918	0.595268	203	0.9898	0.9865	0.98513	0.98063	0.97066	0.94973	0.91225	100	12521148100	12071483988	11027481203
114278			M8-2																	125965640	0.999138	0.004651		294	46	0.726559	1.43339	1.61742	0.947946	206	0.99036	0.98711	0.98596	0.98356	0.97878	0.96684	0.94114	100	12596564000	12148357496	11103344968
114278			M8-3																	123404997	0.998962	0.004634		292	47	0.724925	1.41989	1.10903	1.27849	202	0.99032	0.98704	0.98589	0.98344	0.97845	0.96579	0.93837	100	12340499700	11902421367	10880045373
114492			D5-1																	161595524	0.999849	0.003114		193	33	0.642491	4.07158	27.7869	0.0298644	136	0.95872	0.93586	0.90125	0.81916	0.73904	0.66636	0.60128	150	24239328600	23876493016	23140957565
114492			D5-2																	156908129	0.999887	0.003094		190	33	0.642677	4.10992	27.6386	0.0325326	130	0.95836	0.93327	0.89688	0.81223	0.72986	0.65562	0.58897	150	23536219350	23190879439	22500646865
114492			D5-3																	114976535	0.999898	0.003352		190	32	0.640502	4.36748	28.4889	0.0228145	93	0.95702	0.91598	0.85653	0.73766	0.63607	0.55039	0.47713	150	17246480250	16963490103	16401739505
114492			D6-1																	173092292	0.999851	0.002879		190	32	0.641431	3.50378	24.9588	0.00181997	153	0.95913	0.94204	0.91715	0.85176	0.78097	0.71236	0.64816	150	25963843800	25620662940	24927733597
114492			D6-2																	175416848	0.999915	0.003125		192	33	0.641053	3.61396	25.2449	0.00215839	155	0.95904	0.94105	0.91551	0.85019	0.78025	0.71298	0.64998	150	26312527200	25921612309	25144433263
114492			D6-3																	131205266	0.999887	0.003089		190	32	0.640553	4.01504	27.0943	0.000991703	110	0.95776	0.92678	0.88096	0.78049	0.68801	0.60616	0.53418	150	19680789900	19391719989	18808927123
114492			F7-1																	136707660	0.999874	0.003289		195	33	0.641761	4.09806	27.4853	0.00489456	116	0.95926	0.93141	0.88852	0.79139	0.70094	0.62127	0.55091	150	20506149000	20176681404	19517174395
114492			F7-2																	150811510	0.999885	0.002981		192	33	0.6387	3.04674	20.7897	0.0141335	141	0.96013	0.94405	0.92075	0.85673	0.78313	0.70843	0.63628	150	22621726500	22304967553	21664140558
114492			F7-3																	129416851	0.999865	0.002867		191	33	0.641685	4.27951	27.9374	0.0258601	107	0.95872	0.92504	0.87584	0.77128	0.67686	0.59485	0.52362	150	19412527650	19156750375	18639908826
114492			M8-1																	173849708	0.999881	0.003022		190	32	0.641425	4.03961	27.8573	0.0422876	145	0.95875	0.93693	0.90557	0.82984	0.75395	0.68419	0.62088	150	26077456200	25711703289	24992796345
114492			M8-2																	108061863	0.999869	0.003252		188	31	0.638308	4.21773	27.2671	0.00147732	88	0.95643	0.91307	0.85128	0.72915	0.6242	0.53513	0.4591	150	16209279450	15957301297	15463020007
114492			M8-3																	148876198	0.999847	0.003255		188	31	0.638914	3.95944	26.697	0.00142352	124	0.95813	0.93255	0.89438	0.80613	0.72086	0.64406	0.57509	150	22331429700	21981772799	21288968636
114521			D5-1																	65097824	0.999328	0.002431		239	34	0.740993	3.56899	14.063	0.836031	53	0.97506	0.89919	0.79467	0.60445	0.45455	0.33807	0.24899	150	9764673600	9559491637	9186591841
114521			D5-2																	65513346	0.999288	0.002374		223	31	0.711135	3.82264	15.562	0.681644	49	0.97316	0.88114	0.76656	0.57611	0.43136	0.32008	0.23571	150	9827001900	9626126749	9259201821
114521			D5-3																	63696543	0.999372	0.002342		233	33	0.730081	3.61896	13.0527	0.922234	51	0.97429	0.89369	0.78498	0.59193	0.44099	0.32447	0.23571	150	9554481450	9359645352	9001074313
114521			D6-1																	53778922	0.99934	0.002383		241	34	0.745727	3.4897	13.8262	0.832136	44	0.97388	0.87931	0.7547	0.54114	0.38143	0.26472	0.18172	150	8066838300	7901253118	7599206773
114521			D6-2																	66630742	0.999389	0.002369		237	33	0.737363	3.6346	13.566	0.949002	54	0.97479	0.89836	0.79572	0.60998	0.46293	0.34772	0.25812	150	9994611300	9789443424	9412656565
114521			D6-3																	67468332	0.999374	0.002384		235	34	0.735116	3.49294	13.4043	0.89859	55	0.97488	0.90143	0.80012	0.6146	0.4667	0.35033	0.26012	150	10120249800	9911667637	9528737720
114521			F7-1																	75743836	0.999243	0.002431		244	36	0.750709	3.5061	14.8487	0.757532	62	0.97757	0.91624	0.82789	0.65665	0.51555	0.40191	0.31133	150	11361575400	11124344036	10695013667
114521			F7-2																	69003076	0.999233	0.002388		224	31	0.71357	3.6361	13.8098	0.880533	53	0.97524	0.89329	0.78737	0.60341	0.45941	0.3462	0.25803	150	10350461400	10136637875	9747604389
114521			F7-3																	65323083	0.999298	0.00233		226	31	0.717644	3.64652	13.9798	0.876819	51	0.97481	0.88762	0.77711	0.58762	0.44128	0.32744	0.24009	150	9798462450	9602558913	9244766939
114521			M8-1																	73739059	0.999356	0.00239		236	34	0.736504	3.49199	14.2022	0.78938	59	0.97579	0.90912	0.81553	0.64012	0.49814	0.38459	0.29444	150	11060858850	10833402598	10417831139
114521			M8-2																	66763976	0.999372	0.002332		235	33	0.733933	3.62455	12.5151	1.0924	54	0.97471	0.89831	0.7951	0.60851	0.46108	0.34549	0.25605	150	10014596400	9811552910	9439214547
114521			M8-3																	67529747	0.999317	0.002361		233	33	0.730071	3.47237	13.3463	0.890566	54	0.97484	0.89971	0.79694	0.61066	0.46321	0.34737	0.25794	150	10129462050	9921941598	9541984440
114656			D5-1																	251939882	0.999984	0.002293		184	40	0.768967	1.87002	3.85541	1.14813	248	0.98983	0.98728	0.98579	0.98246	0.97293	0.94786	0.90661	100	25193988200	24898677320	24085337224
114656			D5-2																	229946493	0.999984	0.002169		190	43	0.775457	1.86602	3.84576	1.15509	227	0.99	0.98735	0.98571	0.98174	0.96881	0.93666	0.88708	100	22994649300	22749701925	22073899774
114656			D5-3																	165561567	0.999987	0.002117		188	42	0.775449	1.91166	5.18732	1.2073	161	0.98958	0.98601	0.98341	0.96837	0.91957	0.84368	0.75927	100	16556156700	16384434786	15905450603
114656			D6-1																	222325202	0.99998	0.002246		179	40	0.763543	1.91934	5.32773	0.832957	214	0.98965	0.98705	0.98546	0.97994	0.9593	0.91642	0.85939	100	22232520200	21987135340	21329426577
114656			D6-2																	264007490	0.99998	0.002123		169	35	0.748272	1.90344	3.82521	1.04425	250	0.98935	0.98685	0.98546	0.98181	0.9699	0.94119	0.8983	100	26400749000	26153300584	25494990124
114656			D6-3																	207275890	0.999984	0.002358		180	39	0.762515	1.8831	4.14182	1.0342	202	0.98967	0.9871	0.98554	0.97914	0.9544	0.90534	0.8429	100	20727589000	20476701307	19795196555
114656			F7-1																	207079607	0.999982	0.002079		187	42	0.772279	1.92185	4.31476	1.13661	201	0.99078	0.98788	0.98587	0.97821	0.95434	0.90693	0.84392	100	20707960700	20498074848	19901316395
114656			F7-2																	201056884	0.99998	0.002522		206	48	0.78725	1.8873	4.19161	1.26563	199	0.99123	0.98811	0.98606	0.97901	0.95792	0.91351	0.85041	100	20105688400	19809309143	18991597492
114656			F7-3																	210462360	0.999982	0.002048		175	37	0.756638	1.93019	3.70306	1.3358	202	0.9904	0.98736	0.98516	0.97612	0.94868	0.89861	0.83609	100	21046236000	20846174667	20283597669
114656			M8-1																	269243545	0.999983	0.002499		209	50	0.790161	1.8243	3.757	1.30439	250	0.99067	0.98806	0.98659	0.98387	0.97872	0.96508	0.93755	100	26924354500	26530778150	25447703052
114656			M8-2																	232859991	0.999985	0.00195		173	38	0.755287	1.89459	2.79015	1.49111	225	0.98956	0.98669	0.98485	0.97963	0.96214	0.92355	0.87076	100	23285999100	23089264224	22547882353
114656			M8-3																	228066999	0.999984	0.00215		183	42	0.766272	1.87028	2.92185	1.39492	224	0.98991	0.98731	0.98566	0.98121	0.96619	0.93054	0.87842	100	22806699900	22560142651	21878665319
114659			D5-1																	73603365	0.999965	0.005661		214	26	0.471238	1.59993	8.78093	0.144452	126	0.9893	0.98672	0.98468	0.96999	0.91554	0.81445	0.68522	150	11040504750	10673003091	10108682439
114659			D5-2																	79534870	0.999965	0.00542		214	26	0.471826	1.59708	8.68755	0.0979886	137	0.9893	0.98686	0.98513	0.97425	0.93266	0.85063	0.73796	150	11930230500	11550210130	10956934260
114659			D5-3																	76113743	0.999958	0.00545		215	26	0.473781	1.58761	8.28125	0.0841526	132	0.98928	0.98689	0.98505	0.97307	0.92683	0.83684	0.71713	150	11417061450	11052849610	10486176938
114659			D6-1																	71332787	0.999965	0.005552		216	26	0.475339	1.58388	7.79127	0.090094	124	0.98926	0.98682	0.98477	0.97018	0.91507	0.81198	0.67949	150	10699918050	10350997453	9809080136
114659			D6-2																	67567916	0.999965	0.005948		213	26	0.469734	1.61988	8.82377	0.135446	115	0.98913	0.98656	0.98405	0.96245	0.8889	0.76594	0.61887	150	10135187400	9773238750	9207891765
114659			D6-3																	70697743	0.99996	0.005723		219	28	0.481946	1.59158	7.61877	0.0863222	125	0.98952	0.98699	0.98506	0.97063	0.91593	0.81417	0.6833	150	10604661450	10247168044	9695469434
114659			F7-1																	73533141	0.999961	0.005618		219	27	0.480405	1.61112	7.7267	0.122825	129	0.99036	0.98785	0.98568	0.96951	0.91687	0.82145	0.69905	150	11029971150	10665632752	10100625833
114659			F7-2																	76151560	0.999958	0.005681		215	26	0.47297	1.62268	8.13328	0.089002	132	0.99029	0.98789	0.9858	0.97059	0.92087	0.82899	0.7104	150	11422734000	11043505286	10460905801
114659			F7-3																	56968823	0.999965	0.005753		218	28	0.48081	1.71974	9.83911	0.172957	98	0.99024	0.98714	0.98147	0.93096	0.80985	0.6517	0.49056	150	8545323450	8256739373	7811013926
114659			M8-1																	67014233	0.999968	0.006055		216	26	0.47466	1.62325	8.60445	0.0946062	116	0.98928	0.98669	0.98413	0.96214	0.88901	0.76859	0.62382	150	10052134950	9692131346	9144237630
114659			M8-2																	74632781	0.999965	0.005724		222	28	0.48665	1.59931	7.87921	0.114228	133	0.98961	0.98706	0.98525	0.97315	0.92768	0.83882	0.72159	150	11194917150	10816695469	10230839161
114659			M8-3																	70198268	0.999959	0.005718		219	28	0.48215	1.6205	8.2793	0.0978511	124	0.98964	0.98703	0.98482	0.96809	0.90828	0.80235	0.67023	150	10529740200	10175139648	9627892276
114669			D5-1																	52020618	0.999426	0.002112		141	39	0.540619	1.37715	0.481203	1.30419	75	0.98392	0.97831	0.97456	0.93533	0.74473	0.42626	0.16066	150	7803092700	7608720893	7315365288
114669			D5-2																	53206318	0.999346	0.002117		147	42	0.535129	1.37595	0.0694391	2.09078	79	0.98447	0.97892	0.97543	0.94313	0.78011	0.48994	0.21377	150	7980947700	7799309931	7497820040
114669			D5-3																	46967623	0.999399	0.002156		151	43	0.532053	1.38833	0.244185	1.4377	71	0.98453	0.97867	0.97451	0.92023	0.69288	0.36335	0.12463	150	7045143450	6876296215	6572350284
114669			D6-1																	52005859	0.999424	0.002252		146	41	0.534956	1.38197	0.627206	1.27334	77	0.98426	0.97876	0.97514	0.93889	0.76332	0.46059	0.19122	150	7800878850	7592902283	7241156908
114669			D6-2																	41244254	0.999493	0.002101		147	41	0.536282	1.38649	1.1189	0.687623	62	0.98393	0.97801	0.9722	0.87164	0.54124	0.19681	0.045448	150	6186638100	6036925592	5782292427
114669			D6-3																	45748399	0.999326	0.002202		151	44	0.534211	1.37006	0.201892	1.39628	69	0.98473	0.97886	0.97464	0.91677	0.67242	0.32826	0.10084	150	6862259850	6687232550	6422391880
114669			F7-1																	45541202	0.99942	0.002244		145	41	0.535686	1.39528	0.37293	1.23257	67	0.98491	0.97903	0.97358	0.89582	0.63041	0.28872	0.080091	150	6831180300	6627850948	6349597694
114669			F7-2																	46187139	0.999399	0.002169		148	42	0.53252	1.3949	0.184082	1.7426	69	0.98501	0.97911	0.97384	0.90114	0.65234	0.32076	0.098384	150	6928070850	6741046790	6477592173
114669			F7-3																	66579463	0.999343	0.002382		148	42	0.53291	1.3959	0.246007	1.46629	100	0.98556	0.9805	0.97762	0.96362	0.89301	0.73084	0.50447	150	9986919450	9708947466	9295537104
114669			M8-1																	54637230	0.999257	0.002338		147	41	0.530124	1.36811	0.201938	1.89443	81	0.98437	0.97912	0.97568	0.94746	0.79809	0.51739	0.23767	150	8195584500	7981861644	7652592556
114669			M8-2																	65380405	0.999379	0.002351		150	42	0.53059	1.37069	0.068946	2.01508	99	0.98499	0.97994	0.97714	0.96541	0.8995	0.73054	0.49057	150	9807060750	9556816938	9161427892
114669			M8-3																	53061746	0.999295	0.002246		153	45	0.531626	1.3608	0.111835	1.54203	81	0.9852	0.97979	0.97644	0.94918	0.80316	0.52595	0.24521	150	7959261900	7750797176	7439796391
114677			D5-1																	72534290	0.999677	0.003959		215	55	0.698465	1.43659	2.02213	0.537263	103	0.98817	0.98436	0.98217	0.9688	0.90362	0.7525	0.54304	100	7253429000	7069279654	6572571472
114677			D5-2																	76384630	0.999694	0.003625		215	54	0.699986	1.42169	2.49697	0.282646	109	0.9882	0.98448	0.98242	0.97203	0.92027	0.79161	0.60135	100	7638463000	7461684174	6973808946
114677			D5-3																	72373519	0.999687	0.003765		211	54	0.693904	1.4239	2.27053	0.33622	102	0.9881	0.98424	0.98206	0.96861	0.90165	0.74616	0.53266	100	7237351900	7052689274	6552702240
114677			D6-1																	82889719	0.999714	0.003705		202	50	0.690701	1.41404	1.78964	0.465883	117	0.98794	0.98413	0.98207	0.97372	0.93626	0.83494	0.66942	100	8288971900	8104233523	7585701541
114677			D6-2																	79747725	0.999707	0.004007		215	54	0.698517	1.42763	1.96315	0.455208	114	0.98825	0.98452	0.98261	0.97376	0.93106	0.81919	0.64372	100	7974772500	7764053927	7197849396
114677			D6-3																	72296886	0.999674	0.003712		215	54	0.699722	1.43458	2.6998	0.306843	103	0.9881	0.98432	0.98216	0.96843	0.90204	0.75001	0.54107	100	7229688600	7053178415	6568802797
114677			F7-1																	78899404	0.999669	0.003783		216	56	0.70041	1.45101	2.57393	0.346928	113	0.98919	0.98548	0.98333	0.97065	0.91822	0.79985	0.62785	100	7889940400	7709941294	7212935003
114677			F7-2																	76063100	0.999659	0.004056		216	55	0.697965	1.4475	2.02387	0.495677	108	0.9891	0.98541	0.9832	0.9693	0.90943	0.77682	0.59013	100	7606310000	7405736262	6871386387
114677			F7-3																	73300849	0.999704	0.003545		212	54	0.696555	1.46736	3.15731	0.30544	104	0.98895	0.9851	0.98271	0.96529	0.89304	0.74434	0.54743	100	7330084900	7164256532	6700671175
114677			M8-1																	75295448	0.999675	0.003922		215	54	0.698131	1.43333	1.82007	0.430934	107	0.98832	0.98465	0.98259	0.97141	0.91636	0.78149	0.58395	100	7529544800	7342162593	6835500400
114677			M8-2																	77569310	0.999682	0.003674		214	54	0.697014	1.4376	2.72351	0.329913	110	0.98828	0.98467	0.98263	0.97199	0.92082	0.79605	0.61081	100	7756931000	7566824399	7045007925
114677			M8-3																	82911961	0.999714	0.003707		211	55	0.693313	1.43797	2.51738	0.332388	117	0.98832	0.98477	0.98285	0.97482	0.9364	0.83392	0.66952	100	8291196100	8081683281	7510574001
114679			D5-1																	95790558	0.999988	0.004942		339	50	0.768945	2.26368	13.4933	0.47559	131	0.98879	0.97754	0.96013	0.9052	0.82789	0.73659	0.64165	150	14368583700	13867684059	12953319433
114679			D5-2																	93699564	0.999987	0.004656		336	50	0.769043	2.21479	13.0659	0.40017	128	0.98881	0.97832	0.96202	0.90825	0.82938	0.73383	0.63473	150	14054934600	13599567670	12761488138
114679			D5-3																	117308176	0.999988	0.00492		326	49	0.764449	2.2243	13.5455	0.475035	160	0.98902	0.98028	0.96832	0.93057	0.87592	0.80711	0.7302	150	17596226400	16996825712	15915712005
114679			D6-1																	99043401	0.999981	0.004345		268	58	0.705407	1.91591	7.82226	0.678588	127	0.98944	0.98315	0.97663	0.94663	0.87513	0.76856	0.65101	150	14856510150	14411847073	13595637579
114679			D6-2																	130461175	0.999983	0.004737		255	54	0.691653	1.95181	9.20166	0.461963	163	0.98948	0.98376	0.97863	0.96047	0.92092	0.85561	0.77238	150	19569176250	18897867930	17640769371
114679			D6-3																	76832545	0.999981	0.004665		264	56	0.702463	2.0538	11.2134	0.455315	97	0.9887	0.97926	0.96306	0.88505	0.75422	0.6115	0.48228	150	11524881750	11160251107	10514141936
114679			F7-1																	132535378	0.999986	0.004487		298	44	0.746474	2.14469	12.2541	0.315216	178	0.98974	0.98244	0.97359	0.94528	0.90254	0.84663	0.77988	150	19880306700	19279053248	18193115583
114679			F7-2																	76447528	0.999988	0.005252		334	51	0.763485	2.35614	14.2677	0.55396	102	0.98925	0.97323	0.94446	0.85657	0.74332	0.62414	0.51238	150	11467129200	11040815493	10273639506
114679			F7-3																	81776374	0.999985	0.005347		318	48	0.755627	2.27131	13.303	0.521755	109	0.98923	0.97576	0.95238	0.87778	0.77514	0.66122	0.55041	150	12266456100	11793411433	10935069552
114679			M8-1																	89710959	0.999988	0.005231		329	48	0.762557	2.166	12.5779	0.570061	122	0.9886	0.9777	0.96056	0.90318	0.81805	0.71586	0.61124	150	13456643850	12958669790	12067486321
114679			M8-2																	115341580	0.999987	0.004829		324	49	0.76289	2.18279	13.1892	0.490429	157	0.98893	0.9806	0.96893	0.93142	0.87573	0.80504	0.72585	150	17301237000	16717290672	15654764305
114679			M8-3																	122281272	0.999985	0.004774		325	49	0.763742	2.18525	13.2395	0.405142	167	0.9891	0.98096	0.97023	0.93627	0.88638	0.82265	0.74961	150	18342190800	17737114304	16641600041
114822			D5-1																	44126922	0.999048	0.003183		211	51	0.515522	1.45984	0.0798227	7.68494	72	0.97819	0.96575	0.95533	0.89065	0.68201	0.40099	0.19623	143	6319949381	6073704070	5868225972
114822			D5-2																	51991532	0.998735	0.003475		212	53	0.50992	1.43148	0.0884221	6.49533	85	0.97852	0.96715	0.95928	0.92516	0.80173	0.56483	0.32898	142	7432207942	7043849797	6598302940
114822			D5-3																	54181427	0.998812	0.003307		218	54	0.513562	1.41426	0.0795741	6.33478	89	0.97887	0.96784	0.96055	0.93418	0.83585	0.62104	0.37938	143	7750244645	7358782243	6904182655
114822			D6-1																	45799117	0.999042	0.003217		215	52	0.518521	1.47032	0.0799069	7.46545	76	0.97862	0.96644	0.95701	0.90388	0.72145	0.44857	0.2318	143	6565495545	6306320998	6091216752
114822			D6-2																	39006940	0.999001	0.003247		210	50	0.513184	1.47785	0.0795366	8.19064	63	0.97784	0.96445	0.95104	0.8465	0.56056	0.27609	0.11523	143	5579981278	5356380498	5171715175
114822			D6-3																	56929709	0.998767	0.003238		207	49	0.505498	1.41693	0.0801531	6.51782	92	0.97823	0.96728	0.96026	0.935	0.84594	0.64793	0.41054	142	8128590648	7728297842	7261169954
114822			F7-1																	45898526	0.999017	0.003179		211	51	0.512974	1.42916	0.0799996	7.58886	76	0.97918	0.96718	0.95765	0.90416	0.72408	0.44706	0.22388	143	6570691298	6315792077	6104526311
114822			F7-2																	37956973	0.999013	0.003316		214	52	0.513487	1.47354	0.0800937	8.34947	63	0.97887	0.9655	0.95133	0.84099	0.54963	0.26301	0.1023	143	5437085804	5212494821	5025090723
114822			F7-3																	57177860	0.998733	0.003418		212	51	0.50561	1.40627	0.0795672	6.97757	94	0.97966	0.96881	0.96181	0.93687	0.85381	0.66631	0.43178	143	8178793390	7758070275	7272096154
114822			M8-1																	41245086	0.999057	0.003171		214	52	0.51696	1.48104	0.0800199	8.00147	68	0.97844	0.96524	0.95348	0.87115	0.62408	0.33668	0.15365	143	5910104170	5682322599	5493355698
114822			M8-2																	54638518	0.998829	0.003301		212	52	0.5078	1.45343	0.0799048	7.45837	88	0.97872	0.96747	0.95988	0.92961	0.82405	0.60809	0.3737	143	7815325883	7422390245	6958322778
114822			M8-3																	57092390	0.998763	0.003285		218	54	0.511915	1.42407	0.08022	6.779	94	0.97911	0.96837	0.96153	0.93829	0.85644	0.66698	0.43362	143	8177769647	7768408334	7291212854
114885			D5-1																	63546880	0.999448	0.002221		214	33	0.586073	2.28694	14.8812	1.29325	74	0.97918	0.95801	0.91699	0.78158	0.61501	0.46258	0.34169	150	9532032000	9372777278	9073647850
114885			D5-2																	70071467	0.999194	0.002813		215	30	0.576253	2.11245	11.6699	1.53391	86	0.97906	0.96268	0.93297	0.83224	0.69257	0.54581	0.41299	150	10510720050	10275873800	9860439853
114885			D5-3																	69468809	0.999285	0.002933		228	34	0.594667	2.0756	10.2436	1.76748	89	0.97992	0.96499	0.93908	0.8469	0.71279	0.56626	0.43021	150	10420321350	10173634241	9736429545
114885			D6-1																	54422867	0.999428	0.002203		234	33	0.609608	2.27076	14.5748	1.22825	68	0.9793	0.9567	0.91009	0.75431	0.57002	0.4104	0.29051	150	8163430050	8020779018	7745347009
114885			D6-2																	62002403	0.999512	0.002222		221	32	0.591639	2.43963	16.7909	1.0209	73	0.97882	0.9552	0.91012	0.76618	0.59924	0.45264	0.33797	150	9300360450	9144888345	8851653889
114885			D6-3																	57298496	0.999455	0.002129		231	32	0.601936	2.06816	12.3089	1.44267	74	0.97933	0.95964	0.92265	0.79318	0.62127	0.45532	0.32061	150	8594774400	8458423503	8194694708
114885			F7-1																	54572593	0.999516	0.002205		248	39	0.630205	2.29307	15.2816	1.12556	69	0.98158	0.95941	0.91406	0.76138	0.58189	0.42559	0.30711	150	8185888950	8041218059	7761259563
114885			F7-2																	55640380	0.999469	0.002326		236	35	0.611841	2.33138	15.5764	1.10921	69	0.98076	0.95734	0.90942	0.75338	0.57443	0.42019	0.30343	150	8346057000	8191066141	7892201868
114885			F7-3																	64599489	0.999498	0.002191		220	33	0.592473	2.47595	17.3778	0.958108	75	0.98011	0.95762	0.91322	0.77304	0.61093	0.46751	0.35445	150	9689923350	9532364193	9234258056
114885			M8-1																	60703995	0.99937	0.002341		238	34	0.616204	2.3048	16.3143	0.963291	75	0.97979	0.95963	0.91978	0.78569	0.62149	0.47151	0.35276	150	9105599250	8944699394	8642831688
114885			M8-2																	60996748	0.998978	0.00307		220	31	0.580387	2.0723	9.553	2.23097	76	0.97915	0.9602	0.92521	0.80472	0.64091	0.47611	0.33665	150	9149512200	8922061887	8524637535
114885			M8-3																	76579953	0.999372	0.002083		231	31	0.603072	2.18873	14.109	1.2404	97	0.97974	0.9651	0.93971	0.85536	0.73671	0.60696	0.4847	150	11486992950	11311507623	10971102342
114945			D5-1																	53339019	0.999545	0.002577		211	30	0.479069	1.77426	12.908	0.459038	86	0.98945	0.98699	0.981	0.90739	0.74636	0.55924	0.38983	150	8000852850	7836885795	7534661111
114945			D5-2																	52314351	0.999451	0.002781		249	53	0.5405	1.7193	10.3376	0.299568	94	0.99075	0.98854	0.98502	0.93383	0.80198	0.62938	0.45502	150	7847152650	7667634740	7346475561
114945			D5-3																	43688641	0.999589	0.002521		215	31	0.485238	1.72352	11.6602	0.382495	72	0.98945	0.98672	0.97664	0.86159	0.64571	0.4232	0.24808	150	6553296150	6421099134	6176303745
114945			D6-1																	60382059	0.999559	0.002534		229	36	0.504458	1.66561	10.1979	0.307807	106	0.99019	0.98813	0.98602	0.9569	0.86028	0.71339	0.55046	150	9057308850	8871734172	8526880242
114945			D6-2																	62196918	0.999549	0.002443		229	35	0.504872	1.71735	11.1146	0.337809	109	0.99022	0.98811	0.98602	0.95638	0.86246	0.72289	0.56851	150	9329537700	9148079022	8808210574
114945			D6-3																	51517810	0.999595	0.002428		207	30	0.474541	1.72654	12.238	0.367902	82	0.98929	0.98685	0.98042	0.90076	0.72812	0.52825	0.35117	150	7727671500	7578182067	7298696287
114945			F7-1																	55784748	0.999556	0.002475		213	31	0.481392	1.79789	12.859	0.467689	90	0.99056	0.98805	0.98115	0.91179	0.76488	0.59082	0.42806	150	8367712200	8203556167	7894958067
114945			F7-2																	49926811	0.999613	0.002404		213	31	0.479847	1.72505	11.5417	0.379509	81	0.99027	0.9877	0.97931	0.89394	0.71781	0.51808	0.34033	150	7489021650	7344925227	7073284464
114945			F7-3																	58873108	0.999553	0.00259		231	34	0.506478	1.78362	11.859	0.437947	102	0.99093	0.98879	0.9848	0.9395	0.82611	0.67597	0.52124	150	8830966200	8646681189	8308276872
114945			M8-1																	51006660	0.999587	0.002471		214	31	0.482794	1.71042	11.75	0.350134	84	0.98955	0.98717	0.98142	0.90733	0.74011	0.5434	0.36382	150	7650999000	7499403569	7217214233
114945			M8-2																	59234621	0.999573	0.002425		208	29	0.472334	1.72225	12.0669	0.360801	95	0.98934	0.98718	0.98335	0.93417	0.80491	0.63354	0.46262	150	8885193150	8714333691	8391748230
114945			M8-3																	49711472	0.99948	0.002794		259	45	0.545321	1.69323	9.14261	0.277815	93	0.9906	0.98852	0.98532	0.93633	0.80329	0.62757	0.44706	150	7456720800	7284815520	6975972268
119130			D5-1																	72506250	0.999194	0.002232		180	42	0.49625	1.791	0.904133	1.40372	97	0.98922	0.9843	0.97831	0.9381	0.82492	0.65184	0.4781	150	10875937500	10663887621	10260245155
119130			D5-2																	48917721	0.999307	0.00277		193	48	0.498625	1.79735	1.12981	1.29471	68	0.98885	0.9822	0.96684	0.8467	0.60733	0.38	0.22799	150	7337658150	7163931763	6834995010
119130			D5-3																	51210972	0.99918	0.002771		192	47	0.499183	1.77636	1.394	1.16591	71	0.98893	0.9826	0.96884	0.86266	0.64016	0.41374	0.25434	150	7681645800	7504812125	7168996286
119130			D6-1																	68574694	0.999245	0.002345		187	48	0.503916	1.76512	0.95049	1.28626	94	0.9892	0.98436	0.97767	0.93292	0.80996	0.62859	0.4519	150	10286204100	10068663648	9653628921
119130			D6-2																	50900504	0.99923	0.002827		193	48	0.499856	1.766	0.916811	1.3595	71	0.98902	0.98265	0.96868	0.86165	0.63718	0.41058	0.25185	150	7635075600	7453379682	7106428507
119130			D6-3																	51557319	0.999059	0.00283		196	49	0.4963	1.85076	0.128974	4.19471	71	0.98901	0.97851	0.95848	0.84527	0.63156	0.42024	0.26766	150	7733597850	7530471423	7170782242
119130			F7-1																	59812984	0.99931	0.002426		193	50	0.500668	1.79939	1.19859	1.35433	83	0.99031	0.98497	0.97559	0.90552	0.74145	0.53652	0.36245	150	8971947600	8772339331	8401411568
119130			F7-2																	51738518	0.999269	0.002624		192	47	0.49768	1.8223	1.05617	1.36592	72	0.98981	0.98339	0.96853	0.85874	0.63977	0.41739	0.25894	150	7760777700	7591977319	7264913716
119130			F7-3																	61847949	0.999286	0.002641		194	47	0.492326	1.86593	0.155308	3.72567	84	0.98997	0.98227	0.96832	0.89327	0.73585	0.54444	0.37972	150	9277192350	9051760278	8646802793
119130			M8-1																	71342830	0.999255	0.002314		192	47	0.498858	1.78591	0.932841	1.23321	99	0.9894	0.98484	0.97893	0.94091	0.83501	0.66937	0.49631	150	10701424500	10483049007	10065497380
119130			M8-2																	42331350	0.999342	0.002855		197	49	0.495041	1.84921	0.196805	3.10366	59	0.98893	0.97696	0.94664	0.76465	0.49203	0.28564	0.16384	150	6349702500	6175374516	5875534541
119130			M8-3																	56587241	0.999229	0.00279		194	48	0.495813	1.84276	0.139411	3.27336	78	0.98919	0.9807	0.96478	0.87526	0.69038	0.48433	0.32153	150	8488086150	8268152334	7881338122
121286			D5-1																	57726434	0.998057	0.002356		195	55	0.606942	2.29887	16.3132	0.511191	53	0.98081	0.95866	0.89242	0.65677	0.4414	0.29162	0.19162	150	8658965100	8458021569	8150979431
121286			D5-2																	59974822	0.997617	0.002421		197	51	0.598184	2.24763	15.779	0.610372	56	0.98069	0.9614	0.90507	0.68563	0.4705	0.31623	0.21116	150	8996223300	8799028476	8479614596
121286			D5-3																	60297218	0.997381	0.003224		195	54	0.603108	2.47222	17.8169	0.532411	55	0.98089	0.95702	0.88823	0.66024	0.45605	0.31209	0.2132	150	9044582700	8776722309	8379614809
121286			D6-1																	48423420	0.997991	0.002228		176	48	0.602058	2.21987	14.9759	0.37692	42	0.9795	0.94958	0.8494	0.54123	0.31319	0.17944	0.10298	150	7263513000	7085881316	6828951337
121286			D6-2																	54973061	0.997692	0.002454		187	51	0.602437	2.30629	16.573	0.464862	49	0.98012	0.955	0.8761	0.61783	0.39966	0.25579	0.1631	150	8245959150	8045022442	7738642891
121286			D6-3																	59263083	0.997447	0.002399		195	54	0.60349	2.28508	15.9112	0.523878	55	0.98078	0.96103	0.90212	0.67608	0.45929	0.30552	0.20191	150	8889462450	8678768496	8358029294
121286			F7-1																	49396225	0.998315	0.00223		176	48	0.602299	2.35893	16.1453	0.381413	43	0.98062	0.9479	0.84278	0.5428	0.32402	0.19318	0.11481	150	7409433750	7231540301	6969800132
121286			F7-2																	47367873	0.997626	0.002836		188	52	0.605033	2.71469	20.8652	0.296186	40	0.98048	0.93367	0.80183	0.50692	0.31857	0.203	0.12879	150	7105180950	6899747800	6598945044
121286			F7-3																	62202390	0.99778	0.002385		190	52	0.603397	2.45894	17.3497	0.505524	56	0.9817	0.95813	0.89229	0.67283	0.46918	0.32191	0.22042	150	9330358500	9103484245	8767817381
121286			M8-1																	54857426	0.997947	0.002499		192	53	0.602032	2.31308	16.6658	0.488715	50	0.9805	0.9561	0.87988	0.62496	0.40829	0.26424	0.16992	150	8228613900	8023422350	7716137517
121286			M8-2																	55133942	0.997824	0.002437		182	48	0.598687	2.29654	15.1358	0.476661	50	0.97998	0.95628	0.88173	0.62302	0.39783	0.24879	0.15476	150	8270091300	8071279706	7765073132
121286			M8-3																	54060036	0.997364	0.002442		196	53	0.602016	2.22115	15.3945	0.495427	51	0.98075	0.95891	0.88941	0.6357	0.41115	0.26078	0.16471	150	8109005400	7923147759	7630464059
121381			D5-1																	67084393	0.998382	0.002997		195	57	0.595583	1.74596	1.93666	0.646536	147	0.99113	0.98789	0.9856	0.97373	0.93819	0.86777	0.76873	150	10062658950	9816648035	9415300968
121381			D5-2																	55818884	0.998019	0.003233		195	57	0.595046	1.7685	0.995974	0.781165	122	0.99094	0.98749	0.98418	0.96174	0.89613	0.78569	0.65189	150	8372832600	8179064759	7849559600
121381			D5-3																	58018850	0.998255	0.003039		198	58	0.596413	1.7662	0.918702	0.842143	128	0.99101	0.98766	0.9848	0.96601	0.90973	0.81033	0.68528	150	8702827500	8521159318	8197611506
121381			D6-1																	66038218	0.99829	0.003034		195	57	0.595383	1.74939	1.97877	0.661261	145	0.99114	0.9879	0.98562	0.97383	0.9372	0.86501	0.76336	150	9905732700	9650752127	9255135874
121381			D6-2																	58827417	0.998028	0.003358		194	57	0.595038	1.75967	2.24655	0.647037	129	0.9911	0.98762	0.98475	0.96678	0.91192	0.81334	0.68761	150	8824112550	8578129879	8202250909
121381			D6-3																	55515307	0.998499	0.002973		199	57	0.595959	1.75163	0.97003	0.820155	124	0.99105	0.98763	0.98455	0.96369	0.90082	0.79288	0.65999	150	8327296050	8157851890	7849825169
121381			F7-1																	67864600	0.997946	0.00333		199	58	0.594646	1.75143	2.0747	0.680488	150	0.99085	0.98779	0.98573	0.97503	0.94204	0.87597	0.7814	150	10179690000	9908571673	9476665455
121381			F7-2																	66443645	0.998264	0.003072		197	58	0.595223	1.76389	2.00342	0.706245	146	0.99089	0.98767	0.98547	0.97352	0.93634	0.86458	0.76442	150	9966546750	9708742690	9305946257
121381			F7-3																	54126269	0.998368	0.002942		187	54	0.595879	1.80596	1.09925	0.799569	116	0.99034	0.98679	0.98262	0.95283	0.87316	0.75051	0.6105	150	8118940350	7937807929	7638083407
121381			M8-1																	68040241	0.9983	0.003037		195	57	0.594069	1.73448	1.73569	0.645006	150	0.99127	0.98796	0.98585	0.97536	0.94276	0.87671	0.78092	150	10206036150	9947329721	9540197224
121381			M8-2																	52511036	0.998467	0.002936		197	57	0.594372	1.74845	0.725681	1.00498	116	0.99086	0.98739	0.98396	0.95903	0.88534	0.76337	0.61845	150	7876655400	7718423011	7429460372
121381			M8-3																	51642412	0.998255	0.0031		195	57	0.59462	1.75574	0.935778	0.807749	113	0.99095	0.98721	0.98332	0.95401	0.87237	0.74386	0.59698	150	7746361800	7572195210	7274180125
121406			D5-1																	60603555	0.998904	0.001903		333	51	0.571713	1.54689	2.57661	0.649833	147	0.98931	0.98646	0.98468	0.97849	0.95101	0.89348	0.80645	150	9090533250	8964025157	8710499812
121406			D5-2																	67559101	0.999087	0.001855		335	52	0.571795	1.54332	2.53441	0.639625	164	0.98952	0.98672	0.98504	0.98075	0.96312	0.92059	0.8558	150	10133865150	9999497784	9726988845
121406			D5-3																	69904726	0.998978	0.001963		331	51	0.56573	1.47617	1.69631	0.801405	170	0.98932	0.98642	0.9847	0.98105	0.96962	0.93788	0.88452	150	10485708900	10334900132	10038019599
121406			D6-1																	72649502	0.999021	0.001887		330	51	0.565767	1.46266	1.4574	0.812673	177	0.98942	0.98664	0.98499	0.98158	0.97212	0.94494	0.89788	150	10897425300	10748593618	10451203258
121406			D6-2																	71289582	0.998929	0.001906		323	49	0.562164	1.46038	1.46274	0.786911	174	0.98925	0.98645	0.98481	0.9814	0.97128	0.94248	0.89273	150	10693437300	10544549257	10249185143
121406			D6-3																	60291725	0.998855	0.001969		335	52	0.573236	1.54315	2.49042	0.65202	147	0.9893	0.98647	0.98461	0.97812	0.94937	0.89029	0.80341	150	9043758750	8911926251	8651824176
121406			F7-1																	70348334	0.998857	0.001942		334	52	0.571124	1.56356	3.02627	0.708101	171	0.99042	0.98783	0.98635	0.98203	0.9652	0.92353	0.86224	150	10552250100	10404420506	10114344783
121406			F7-2																	71704154	0.999153	0.001904		334	52	0.566331	1.49162	1.43465	0.896491	175	0.99038	0.98763	0.98599	0.98215	0.97027	0.93773	0.88492	150	10755623100	10608203701	10312259977
121406			F7-3																	73379365	0.998715	0.001991		337	52	0.566864	1.49117	1.5521	0.899624	179	0.99045	0.98765	0.98602	0.98241	0.97165	0.94161	0.89143	150	11006904750	10843996837	10525228667
121406			M8-1																	65081689	0.998835	0.001953		334	51	0.570442	1.53684	2.3107	0.655202	158	0.98955	0.98692	0.9853	0.98052	0.95966	0.91212	0.84108	150	9762253350	9622282968	9346570012
121406			M8-2																	69786730	0.999037	0.001821		325	50	0.565262	1.50942	1.92247	0.635029	169	0.98938	0.98679	0.98523	0.98136	0.96652	0.92864	0.87025	150	10468009500	10333715639	10061346617
121406			M8-3																	69530573	0.999033	0.001842		331	50	0.565347	1.46801	1.1084	0.832314	169	0.98949	0.98671	0.985	0.98129	0.96968	0.93772	0.8849	150	10429585950	10291207089	10014418458
121411			D5-1																	110304740	0.99936	0.002363		249	78	0.573953	1.63418	7.07278	0.600578	188	0.99207	0.98989	0.98861	0.98252	0.96694	0.9346	0.88245	150	16602014404	16280848104	15668207059
121411			D5-2																	109322987	0.999326	0.002411		265	86	0.580961	1.62123	6.46315	0.679644	191	0.99227	0.99021	0.98906	0.98376	0.97017	0.94095	0.89212	150	16454021948	16135500800	15520829283
121411			D5-3																	126309976	0.999435	0.002307		243	74	0.569418	1.61348	6.65097	0.515679	215	0.99194	0.9899	0.98883	0.98496	0.97548	0.95553	0.92102	150	19011522628	18653005235	17945370319
121411			D6-1																	97944241	0.999302	0.002427		259	81	0.578589	1.67211	8.06268	0.597616	169	0.99213	0.98988	0.98829	0.97909	0.95457	0.90626	0.83518	150	14740691554	14455013721	13909805074
121411			D6-2																	98275602	0.999198	0.002893		265	86	0.579121	1.60717	6.15098	0.741332	171	0.99221	0.99002	0.98873	0.98191	0.96251	0.9213	0.85573	150	14791594276	14443189308	13812709761
121411			D6-3																	77803517	0.99933	0.002685		268	87	0.582853	1.63182	6.41901	0.622114	136	0.99204	0.9898	0.98769	0.97356	0.93138	0.85187	0.74018	150	11710318246	11454560699	10973367014
121411			F7-1																	111612416	0.999332	0.002406		249	77	0.569577	1.63321	7.65511	0.524793	191	0.9919	0.98979	0.98865	0.98313	0.96834	0.93735	0.88653	150	16798333710	16468195599	15842465406
121411			F7-2																	109071164	0.999235	0.002621		252	78	0.571208	1.63743	7.38944	0.601213	187	0.9919	0.98977	0.98856	0.98266	0.96667	0.93339	0.87963	150	16415470516	16069898468	15419007093
121411			F7-3																	78738820	0.999226	0.002673		271	89	0.582669	1.63351	7.13231	0.626404	138	0.99204	0.98975	0.98783	0.9741	0.93269	0.85438	0.745	150	11850046537	11599709593	11131111307
121411			M8-1																	83140211	0.999263	0.00256		268	89	0.581621	1.63518	6.42295	0.819348	145	0.99232	0.99018	0.98828	0.97647	0.94141	0.87317	0.77478	150	12513524220	12254145218	11767773844
121411			M8-2																	117427777	0.999269	0.002597		266	86	0.578977	1.61391	6.03153	0.853334	204	0.99247	0.99054	0.98949	0.98555	0.97465	0.95164	0.91214	150	17674313118	17305021308	16606342054
121411			M8-3																	86661633	0.999181	0.002773		254	80	0.573221	1.66314	7.40018	0.649822	148	0.99216	0.98986	0.98787	0.97534	0.94001	0.87366	0.77897	150	13042991166	12750550059	12214389857
121475			D5-1																	68680037	0.999546	0.001933		188	32	0.442916	2.96539	9.43902	3.22627	82	0.98083	0.94288	0.89232	0.77042	0.63888	0.51595	0.41079	150	10302005550	10149963549	9850002496
121475			D5-2																	60921820	0.999024	0.001982		184	31	0.443834	3.01097	10.4987	2.43114	71	0.98087	0.9388	0.8774	0.72857	0.57856	0.44781	0.34348	150	9138273000	8994727882	8728753785
121475			D5-3																	69748508	0.99946	0.001924		189	31	0.441856	2.93814	9.84804	2.74182	84	0.98107	0.94562	0.89662	0.7772	0.64711	0.52484	0.41973	150	10462276200	10309658036	10011808266
121475			D6-1																	66239616	0.998999	0.001991		188	31	0.440972	3.00661	10.6358	2.55062	78	0.98079	0.94224	0.88832	0.75612	0.61701	0.49104	0.38652	150	9935942400	9780253704	9492042849
121475			D6-2																	55918093	0.999529	0.001973		195	34	0.446152	2.88307	9.01328	3.38072	70	0.98039	0.93604	0.87522	0.72657	0.57293	0.43796	0.33053	150	8387713950	8258820940	8012775469
121475			D6-3																	69119068	0.999043	0.002075		193	31	0.442113	2.92316	9.73636	2.50249	85	0.98139	0.94703	0.89934	0.78164	0.65209	0.52986	0.42389	150	10367860200	10198677175	9882649100
121475			F7-1																	62253811	0.999412	0.001957		192	32	0.442221	3.0024	9.59018	3.03183	75	0.98191	0.94095	0.88317	0.74461	0.60073	0.47236	0.36708	150	9338071650	9200609833	8932223134
121475			F7-2																	63840027	0.999372	0.001953		196	32	0.445444	2.94116	9.78114	2.84317	78	0.98217	0.94401	0.89015	0.75879	0.61948	0.49287	0.38718	150	9576004050	9432355905	9156075564
121475			F7-3																	58186489	0.999345	0.001934		195	32	0.443892	2.90943	9.60588	2.37212	72	0.98228	0.94271	0.88397	0.73826	0.58674	0.45321	0.34578	150	8727973350	8600029454	8347134071
121475			M8-1																	70443273	0.999453	0.00194		197	33	0.447713	2.87523	9.42693	2.84934	88	0.98169	0.94864	0.90318	0.79124	0.66684	0.54723	0.44201	150	10566490950	10411048315	10108267771
121475			M8-2																	56841062	0.998372	0.001969		204	33	0.45157	2.81796	9.56775	2.2508	74	0.98193	0.9446	0.88853	0.74724	0.59657	0.46206	0.35346	150	8526159300	8393272459	8145776498
121475			M8-3																	61074264	0.999488	0.001969		193	32	0.443701	2.95941	9.47624	2.87063	75	0.98101	0.94129	0.88506	0.74796	0.60302	0.47274	0.36617	150	9161139600	9025380043	8762095936
121477			D5-1																	44579482	0.998921	0.002669		281	84	0.651545	1.67262	6.07493	0.106013	74	0.99132	0.98875	0.98228	0.87644	0.66298	0.43954	0.26421	150	6686922300	6537840925	6281445772
121477			D5-2																	68722046	0.999259	0.002292		264	81	0.644185	1.64294	5.76988	0.102862	111	0.99141	0.98933	0.98788	0.97068	0.8878	0.74813	0.58983	150	10308306900	10101585425	9745134096
121477			D5-3																	60619568	0.998657	0.002605		274	81	0.65249	1.71611	7.28073	0.0760405	99	0.99139	0.98917	0.98686	0.9464	0.82103	0.65975	0.49537	150	9092935200	8891233983	8548698999
121477			D6-1																	62235474	0.999239	0.002365		261	79	0.641385	1.60735	5.01849	0.132785	101	0.99131	0.98912	0.98733	0.9608	0.85181	0.68689	0.51036	150	9335321100	9151261354	8820108889
121477			D6-2																	59004524	0.999021	0.002534		260	81	0.644922	1.6934	8.03384	0.029238	94	0.99125	0.98902	0.98654	0.94184	0.80471	0.62775	0.45451	150	8850678600	8661123777	8334094190
121477			D6-3																	74130280	0.998932	0.002595		263	81	0.646928	1.68986	7.16327	0.0648869	119	0.99141	0.98932	0.98791	0.97206	0.89771	0.77532	0.63701	150	11119542000	10877229719	10454495233
121477			F7-1																	66609679	0.999098	0.002384		260	81	0.640411	1.66731	6.25527	0.0894646	107	0.99235	0.99015	0.98782	0.96081	0.86419	0.71599	0.55526	150	9991451850	9793987509	9441009328
121477			F7-2																	68871903	0.999099	0.002455		268	82	0.642716	1.66989	6.4615	0.0806599	111	0.99249	0.99028	0.9882	0.96502	0.87842	0.74105	0.58922	150	10330785450	10116988485	9744751548
121477			F7-3																	71894454	0.998904	0.00249		259	79	0.638468	1.65826	5.8629	0.0986431	115	0.99238	0.9902	0.98841	0.96971	0.89381	0.76317	0.61382	150	10784168100	10561736121	10169671221
121477			M8-1																	70572616	0.999213	0.002261		258	80	0.644173	1.66023	7.53706	0.0464426	113	0.99142	0.98929	0.98778	0.96848	0.88442	0.74905	0.59811	150	10585892400	10385456532	10023447317
121477			M8-2																	66917235	0.99905	0.002582		256	80	0.639595	1.62233	5.3356	0.0979767	106	0.99132	0.9892	0.98762	0.96774	0.87572	0.72511	0.55739	150	10037585250	9812744355	9430562402
121477			M8-3																	55514967	0.998949	0.002385		268	83	0.650684	1.69303	6.43934	0.124638	90	0.99132	0.98907	0.98613	0.9321	0.7818	0.5986	0.42191	150	8327245050	8160123446	7866113174
121503			D5-1																	28786916	0.999825	0.005847		194	49	0.534981	1.49087	4.57712	0.40468	45	0.98624	0.97876	0.9493	0.63369	0.23352	0.056508	0.01411	150	4318037400	4144755832	3770900484
121503			D5-2																	39404561	0.999805	0.00578		200	51	0.537121	1.4717	4.57833	0.260539	63	0.98701	0.98158	0.97507	0.86075	0.56343	0.26633	0.09816	150	5910684150	5681978609	5184533255
121503			D5-3																	32587532	0.999821	0.005893		202	50	0.534386	1.48785	4.72757	0.371337	52	0.9867	0.98079	0.96503	0.74526	0.37054	0.12585	0.036911	150	4888129800	4693201268	4271203402
121503			D6-1																	37946273	0.999786	0.00601		199	50	0.535389	1.47239	4.42665	0.245846	61	0.98695	0.98125	0.97349	0.84081	0.52366	0.23126	0.080323	150	5691940950	5455841769	4952679229
121503			D6-2																	40581172	0.999792	0.005946		202	51	0.536021	1.45453	4.08892	0.321191	66	0.98702	0.98165	0.976	0.87669	0.59894	0.29854	0.11459	150	6087175800	5840326592	5312674756
121503			D6-3																	37014614	0.999799	0.005891		199	50	0.534142	1.46516	4.04289	0.369738	59	0.98681	0.98121	0.97273	0.83045	0.49789	0.20591	0.066817	150	5552192100	5332414977	4860638033
121503			F7-1																	37747683	0.999794	0.005872		199	50	0.534699	1.49585	4.40279	0.234064	60	0.98764	0.98194	0.97209	0.83014	0.51623	0.22928	0.080083	150	5662152450	5437060083	4952185741
121503			F7-2																	32388971	0.999811	0.005754		198	49	0.534523	1.51329	4.57118	0.191872	52	0.98733	0.98103	0.96168	0.73337	0.35886	0.11767	0.032755	150	4858345650	4670718929	4261204181
121503			F7-3																	41510965	0.999803	0.005715		189	46	0.530724	1.51897	4.96991	0.124616	64	0.98727	0.98184	0.974	0.85681	0.57398	0.28471	0.11117	150	6226644750	5985839938	5466048175
121503			M8-1																	35387526	0.999828	0.00563		191	48	0.533687	1.48512	4.31651	0.229199	55	0.9867	0.98084	0.96868	0.78621	0.42365	0.15448	0.046181	150	5308128900	5104672516	4659258807
121503			M8-2																	36276763	0.999828	0.00557		185	44	0.527911	1.50412	4.69268	0.244299	55	0.98619	0.98047	0.96831	0.78539	0.42779	0.1613	0.049855	150	5441514450	5234916790	4785415920
121503			M8-3																	37776837	0.999773	0.006358		198	50	0.529464	1.48032	3.16502	0.619339	60	0.98702	0.98141	0.97332	0.83674	0.50984	0.2149	0.069828	150	5666525550	5417064610	4897632509
121512			D5-1																	51308058	0.999	0.003424		248	42	0.535002	2.05903	16.7694	0.79652	89	0.99075	0.98795	0.97576	0.87691	0.72212	0.56694	0.43288	150	7696208700	7482502240	7149774911
121512			D5-2																	47272858	0.999217	0.003109		221	35	0.498776	2.04112	16.5917	0.69711	76	0.98983	0.98622	0.96654	0.83215	0.64396	0.47091	0.33041	150	7090928700	6909997356	6620441709
121512			D5-3																	44929974	0.999321	0.003088		221	35	0.496489	1.84556	13.4302	0.458426	74	0.98983	0.98691	0.97376	0.85141	0.64726	0.4462	0.28261	150	6739496100	6567417161	6286668848
121512			D6-1																	54206098	0.999241	0.003087		214	34	0.486939	1.93548	15.3767	0.565744	86	0.98982	0.98712	0.97712	0.88555	0.72428	0.55464	0.40589	150	8130914700	7925414810	7593015274
121512			D6-2																	52217721	0.999195	0.00303		223	34	0.496198	1.90359	14.9804	0.560471	86	0.9899	0.98723	0.97747	0.886	0.72467	0.55368	0.4028	150	7832658150	7639507525	7323458357
121512			D6-3																	50356897	0.999303	0.002884		215	32	0.485535	1.94523	15.7998	0.635942	80	0.9896	0.98659	0.97288	0.86084	0.68275	0.50661	0.35973	150	7553534550	7375894871	7083502885
121512			F7-1																	50614187	0.999064	0.003365		251	44	0.535116	1.95534	14.5661	0.638187	89	0.99176	0.98908	0.97851	0.89035	0.73699	0.57429	0.43107	150	7592128050	7383764495	7054627586
121512			F7-2																	56533575	0.999266	0.003118		226	34	0.500832	1.93184	14.944	0.55157	94	0.99085	0.9883	0.97919	0.90062	0.75998	0.60342	0.46095	150	8480036250	8263472340	7911814895
121512			F7-3																	40024575	0.999302	0.003079		225	34	0.500402	1.96204	15.3027	0.607564	66	0.99073	0.98562	0.95482	0.78046	0.56153	0.37625	0.2359	150	6003686250	5852498157	5606598678
121512			M8-1																	54652066	0.999254	0.00302		226	35	0.503522	1.98283	16.3272	0.708513	90	0.99005	0.98742	0.97723	0.8874	0.73455	0.57456	0.43483	150	8197809900	7995577032	7667491482
121512			M8-2																	47524439	0.999305	0.002946		226	33	0.500601	1.93566	15.5571	0.629316	79	0.98989	0.98679	0.97168	0.85239	0.66964	0.49264	0.34501	150	7128665850	6956994914	6673986195
121512			M8-3																	43073102	0.999137	0.003068		223	34	0.496634	1.99215	16.2967	0.693162	70	0.98979	0.98571	0.9613	0.80534	0.60012	0.41912	0.27854	150	6460965300	6299433578	6038456906
121532			D5-1																	80266430	0.999961	0.004826		257	38	0.537451	1.75763	6.09626	1.60408	151	0.98876	0.98386	0.97904	0.9614	0.92207	0.85493	0.76591	150	12039964500	11713142971	11080643180
121532			D5-2																	85121580	0.999948	0.005278		275	40	0.558792	1.80491	7.32326	1.43292	167	0.98921	0.98453	0.9802	0.96471	0.93082	0.87432	0.79927	150	12768237000	12389487150	11666693032
121532			D5-3																	112996349	0.999957	0.005171		264	39	0.5445	1.77146	7.67628	1.07436	217	0.98935	0.98606	0.98348	0.97541	0.95915	0.93063	0.8885	150	16949452350	16457450941	15513096906
121532			D6-1																	81238907	0.999942	0.005075		266	39	0.548715	1.70797	3.82561	1.87996	158	0.98897	0.98359	0.9791	0.96538	0.93393	0.87605	0.79478	150	12185836050	11838827576	11177612730
121532			D6-2																	87431476	0.999951	0.004747		258	37	0.5415	1.83305	8.40431	1.22985	166	0.98908	0.98493	0.98074	0.96375	0.92744	0.86896	0.7934	150	13114721400	12773059731	12117196931
121532			D6-3																	97872045	0.999953	0.00483		271	40	0.553981	1.746	5.52566	1.77172	191	0.98934	0.98511	0.98173	0.97184	0.95169	0.91506	0.86069	150	14680806750	14284604889	13523921197
121532			F7-1																	61287670	0.999945	0.005933		262	37	0.539736	1.785	5.44239	1.50773	115	0.98978	0.98478	0.97781	0.94122	0.85876	0.73968	0.60492	150	9193150500	8882468436	8303778897
121532			F7-2																	74385544	0.999937	0.005653		274	41	0.553903	1.77371	4.37222	2.03559	143	0.99013	0.98528	0.98028	0.96013	0.91437	0.83765	0.73925	150	11157831600	10801172741	10131920469
121532			F7-3																	64408912	0.99995	0.005338		273	41	0.55385	1.77477	4.58225	1.73034	124	0.9901	0.9857	0.9799	0.95055	0.88198	0.77759	0.65425	150	9661336800	9371172171	8819771116
121532			M8-1																	75435563	0.999943	0.005437		282	42	0.56721	1.80186	6.01526	1.87439	149	0.98934	0.98449	0.97935	0.95961	0.91534	0.84325	0.75193	150	11315334450	10969005850	10316056286
121532			M8-2																	75407865	0.999949	0.006705		271	39	0.552067	1.85545	7.47371	1.81898	146	0.9889	0.98175	0.9753	0.95132	0.90108	0.82451	0.73148	150	11311179750	10876242938	10073362778
121532			M8-3																	95248047	0.999949	0.006112		259	37	0.535559	1.79269	7.67392	1.44031	180	0.9891	0.9844	0.9803	0.96683	0.93897	0.89245	0.82831	150	14287207050	13784523001	12840991075
121535			D5-1																	67102707	0.997218	0.003135		218	66	0.666904	3.8379	24.826	0.267295	66	0.98768	0.96406	0.86641	0.66353	0.53353	0.43666	0.35689	150	10065406050	9813678313	9431161789
121535			D5-2																	117905986	0.997279	0.003097		229	69	0.670026	3.98918	24.1873	0.642601	122	0.98852	0.98086	0.95085	0.82889	0.71611	0.63148	0.5644	150	17685897900	17251390265	16577311665
121535			D5-3																	103916300	0.997059	0.002995		210	62	0.663448	4.46492	25.1687	0.512035	100	0.98787	0.9731	0.91202	0.75638	0.64672	0.56759	0.50196	150	15587445000	15209259954	14633314106
121535			D6-1																	105143831	0.996361	0.002813		203	60	0.663119	4.58962	26.5773	0.177702	93	0.98775	0.97356	0.91266	0.74895	0.6318	0.54766	0.48115	150	15771574650	15404803943	14853761379
121535			D6-2																	96576773	0.996948	0.003124		219	65	0.669305	3.99238	25.795	0.150463	94	0.98806	0.97715	0.92953	0.77212	0.64516	0.55362	0.48104	150	14486515950	14123909222	13576310766
121535			D6-3																	100780248	0.99736	0.003081		228	68	0.671084	4.19762	24.4142	0.673129	104	0.98809	0.97446	0.92182	0.77277	0.66038	0.57942	0.51246	150	15117037200	14745273772	14166837037
121535			F7-1																	91852806	0.997003	0.002842		201	59	0.660001	4.4964	26.6988	0.154007	80	0.98825	0.96754	0.89196	0.71404	0.5903	0.50281	0.43363	150	13777920900	13458570758	12968175860
121535			F7-2																	100997681	0.997073	0.003139		237	74	0.672708	3.82554	24.5636	0.299092	104	0.98953	0.98028	0.94268	0.80266	0.67888	0.58712	0.51394	150	15149652150	14777556240	14204199951
121535			F7-3																	92628211	0.996671	0.003219		217	67	0.663908	3.58555	22.3016	0.344111	93	0.9891	0.98007	0.94054	0.78876	0.6564	0.55725	0.47732	150	13894231650	13553316314	13028720517
121535			M8-1																	90360585	0.996537	0.003382		226	68	0.667802	3.93318	25.4657	0.148455	88	0.98831	0.97641	0.92362	0.75691	0.62788	0.53451	0.46038	150	13554087750	13186648487	12637642728
121535			M8-2																	108111452	0.997257	0.002962		214	64	0.665823	3.83052	23.8925	0.363992	108	0.98806	0.98017	0.94673	0.81275	0.69092	0.59954	0.52682	150	16216717800	15837117766	15247464864
121535			M8-3																	114235678	0.99715	0.00285		207	60	0.660979	4.30068	24.6673	0.582627	110	0.98804	0.9769	0.9307	0.78889	0.67791	0.59644	0.53101	150	17135351700	16745096006	16138465908
121567			D5-1																	47331290	0.999423	0.003027		229	57	0.549821	1.93427	15.1353	0	81	0.98405	0.95386	0.92399	0.82578	0.67787	0.51448	0.35942	151	7147024790	6982755848	6700245681
121567			D5-2																	53041384	0.999405	0.003182		248	61	0.559332	1.8947	14.1699	0	94	0.98634	0.96342	0.94183	0.86977	0.75018	0.60681	0.46361	151	8009248984	7816142213	7483449054
121567			D5-3																	45080758	0.999438	0.003009		242	62	0.557417	1.83604	13.1527	0	80	0.98574	0.96078	0.93456	0.83856	0.68234	0.50679	0.34198	151	6807194458	6649452056	6375912745
121567			D6-1																	48469535	0.999507	0.002756		233	59	0.55503	1.80913	12.7981	0	86	0.98535	0.95828	0.93419	0.85276	0.71653	0.55249	0.3891	151	7318899785	7162252855	6883736353
121567			D6-2																	36970587	0.999464	0.002961		230	57	0.550603	1.87264	13.9757	0	64	0.98329	0.94894	0.90846	0.75926	0.54957	0.34435	0.18514	151	5582558637	5456412883	5237391344
121567			D6-3																	51128032	0.999468	0.002986		234	58	0.552195	1.79767	12.9187	0	90	0.98616	0.96333	0.94168	0.86871	0.74156	0.58417	0.42484	151	7720332832	7544169978	7235285982
121567			F7-1																	45856321	0.999439	0.003131		250	65	0.562782	1.88589	12.8548	0.00083689	82	0.98641	0.95891	0.93236	0.83864	0.69009	0.5239	0.36631	151	6924304471	6760416585	6476369077
121567			F7-2																	44811630	0.999436	0.003023		238	60	0.554864	1.93523	14.2342	0	78	0.9855	0.95561	0.92453	0.81807	0.65997	0.49026	0.33376	151	6766556130	6610942301	6339109154
121567			F7-3																	73214725	0.999531	0.002704		234	51	0.545245	1.82393	13.3729	0	128	0.98808	0.96913	0.95542	0.91731	0.85428	0.76506	0.65893	151	11055423475	10827825418	10418503357
121567			M8-1																	46820915	0.999463	0.002953		249	63	0.561575	1.8834	13.3379	0.000234378	84	0.98533	0.95788	0.93203	0.84346	0.70104	0.53861	0.38078	151	7069958165	6911581554	6633293600
121567			M8-2																	57846939	0.999449	0.003065		253	55	0.55846	1.8971	14.0598	0	104	0.98662	0.9652	0.94631	0.88737	0.78757	0.66137	0.52977	151	8734887789	8531106513	8176173524
121567			M8-3																	44188228	0.999546	0.003016		237	59	0.552245	1.78225	12.6268	6.68e-05	78	0.98569	0.96064	0.9342	0.83561	0.67159	0.48594	0.31425	151	6672422428	6517013899	6235945646
121596			D5-1																	65235699	0.997379	0.002654		215	62	0.627536	2.5375	21.2518	0.462267	64	0.98268	0.96964	0.92951	0.73754	0.53596	0.39144	0.29284	150	9785354850	9551503880	9207449942
121596			D5-2																	78919083	0.997192	0.002691		206	59	0.623312	2.55917	21.2357	0.431279	75	0.98264	0.97231	0.94748	0.80758	0.62285	0.47194	0.3632	150	11837862450	11532823624	11108804182
121596			D5-3																	67008511	0.997481	0.002629		207	60	0.626547	2.58605	21.5158	0.412597	64	0.98232	0.96962	0.93063	0.74193	0.53988	0.39485	0.29658	150	10051276650	9812728385	9459790055
121596			D6-1																	55441821	0.997395	0.002593		194	54	0.618902	2.4868	19.9027	0.493548	52	0.9815	0.9635	0.89963	0.64643	0.42844	0.29158	0.20496	150	8316273150	8124756226	7842491463
121596			D6-2																	65331856	0.997489	0.002714		199	57	0.621073	2.54848	21.0856	0.45801	61	0.98219	0.96828	0.92362	0.71787	0.50983	0.36629	0.27049	150	9799778400	9557263389	9204562150
121596			D6-3																	59164073	0.997477	0.002611		199	57	0.6207	2.51354	20.1133	0.492957	56	0.98208	0.96667	0.91443	0.6841	0.46771	0.32523	0.23329	150	8874610950	8674046168	8378221690
121596			F7-1																	60598343	0.997405	0.002612		215	63	0.627013	2.63045	21.3778	0.466938	58	0.98381	0.96804	0.91573	0.69729	0.49136	0.35236	0.2599	150	9089751450	8878159483	8564539480
121596			F7-2																	71821796	0.997211	0.002673		209	61	0.623034	2.55974	20.801	0.4742	69	0.98417	0.97227	0.94021	0.77391	0.57682	0.42607	0.3212	150	10773269400	10516703711	10136390058
121596			F7-3																	57246504	0.997323	0.002747		216	65	0.62928	2.63978	21.8027	0.436887	55	0.98402	0.96676	0.90575	0.66709	0.4595	0.32536	0.23823	150	8586975600	8375549286	8073605629
121596			M8-1																	59254690	0.9972	0.002701		205	58	0.621749	2.53466	20.6128	0.460093	57	0.98232	0.96718	0.91545	0.68774	0.47405	0.33314	0.24138	150	8888203500	8669468310	8351576573
121596			M8-2																	69874020	0.997372	0.00258		194	55	0.619798	2.5047	20.4506	0.485413	65	0.98201	0.96923	0.93175	0.74917	0.5453	0.39566	0.294	150	10481103000	10239470251	9893315484
121596			M8-3																	62694404	0.997319	0.002654		196	55	0.617722	2.50218	19.9576	0.524854	59	0.98179	0.9672	0.9204	0.70771	0.4941	0.34758	0.25185	150	9404160600	9181116331	8858313619
122128			D5-1																	69956277	0.999416	0.002908		229	34	0.503498	1.72754	11.2748	0.292821	122	0.99007	0.98811	0.98627	0.96479	0.89446	0.78234	0.64984	150	10493441550	10265005754	9856332590
122128			D5-2																	63821352	0.999343	0.003271		262	45	0.550668	1.84561	12.143	0.339558	121	0.99111	0.98902	0.98608	0.95358	0.8709	0.75678	0.63242	150	9573202800	9319519283	8892156724
122128			D5-3																	71416436	0.999326	0.003067		246	38	0.530006	1.81077	12.3798	0.392926	130	0.99054	0.98859	0.98666	0.96432	0.89805	0.79664	0.67913	150	10712465400	10464365089	10032318166
122128			D6-1																	59272640	0.999393	0.003041		231	34	0.506959	1.82572	13.1724	0.430335	102	0.99006	0.98785	0.98342	0.93326	0.81799	0.67001	0.52037	150	8890896000	8687764420	8329788631
122128			D6-2																	58163038	0.999477	0.002997		237	36	0.516929	1.77005	11.7443	0.320867	104	0.99022	0.98808	0.98461	0.94134	0.83124	0.68329	0.52989	150	8724455700	8510911546	8141399326
122128			D6-3																	55767307	0.999413	0.002995		242	36	0.52275	1.80024	12.2568	0.393487	100	0.99022	0.98806	0.98393	0.93328	0.81379	0.65901	0.50374	150	8365096050	8176233005	7842496910
122128			F7-1																	60473106	0.999381	0.002885		248	36	0.531136	1.89404	13.618	0.500693	109	0.99128	0.98914	0.9841	0.93531	0.82913	0.69529	0.5609	150	9070965900	8875581107	8525355826
122128			F7-2																	54627534	0.999448	0.002896		224	32	0.495414	1.84851	13.4742	0.439176	91	0.99071	0.98802	0.97924	0.9035	0.75954	0.5944	0.44066	150	8194130100	8016502781	7698149091
122128			F7-3																	51836090	0.999373	0.003145		261	41	0.546972	1.81135	11.0314	0.362004	98	0.99148	0.98931	0.9837	0.92648	0.79915	0.64322	0.48752	150	7775413500	7576900046	7238204995
122128			M8-1																	74422610	0.999388	0.002939		235	36	0.5129	1.76102	12.1533	0.347926	132	0.99038	0.98848	0.98671	0.96723	0.90625	0.8091	0.69286	150	11163391500	10915051565	10476027269
122128			M8-2																	56992042	0.999395	0.003175		251	40	0.535128	1.7442	10.5729	0.334668	106	0.99059	0.98855	0.98591	0.94979	0.84687	0.7027	0.54791	150	8548806300	8326705090	7948283910
122128			M8-3																	49531833	0.99948	0.002293		222	33	0.498637	1.84989	13.8815	0.451068	82	0.98968	0.98691	0.97703	0.88205	0.70978	0.525	0.36433	150	7429774950	7292472312	7048758200
122334			D5-1																	317742465	0.999542	0.002435		214	57	0.494843	1.40217	6.7247	0.318185	250	0.98992	0.98602	0.98496	0.98375	0.98283	0.98205	0.9813	151	47979112215	46996069124	45160858620
122334			D5-2																	265541315	0.999465	0.002688		214	56	0.494084	1.40623	6.88404	0.307264	250	0.98968	0.98574	0.98465	0.9834	0.98239	0.98149	0.98062	151	40096738565	39187385858	37542907313
122334			D5-3																	281421903	0.999456	0.002681		213	56	0.493393	1.40331	6.86072	0.294545	250	0.98984	0.98587	0.98481	0.98351	0.98256	0.98168	0.98085	151	42494707353	41535778797	39803176097
122334			D6-1																	240208393	0.999544	0.002545		209	54	0.491176	1.39149	6.54953	0.281037	250	0.98939	0.9854	0.9843	0.98298	0.98195	0.98105	0.98014	151	36271467343	35497321181	34074065463
122334			D6-2																	232899286	0.999418	0.002833		211	55	0.492314	1.40176	7.03153	0.301748	250	0.98939	0.98543	0.98434	0.98299	0.98198	0.98106	0.98008	151	35167792186	34329473268	32834538013
122334			D6-3																	279286884	0.999495	0.00264		216	58	0.496089	1.40904	6.93486	0.311496	250	0.98979	0.9859	0.98484	0.98361	0.98263	0.98179	0.981	151	42172319484	41242554919	39551356261
122334			F7-1																	248902776	0.999568	0.002514		216	57	0.494933	1.42541	6.84458	0.345755	250	0.99024	0.98653	0.98551	0.98421	0.98319	0.98228	0.98135	151	37584319176	36797472157	35347129754
122334			F7-2																	274267069	0.99947	0.002634		210	54	0.491173	1.43134	7.16758	0.354992	250	0.99015	0.98643	0.98542	0.98412	0.98313	0.98231	0.98148	151	41414327419	40499157191	38834357531
122334			F7-3																	278552372	0.99945	0.002616		212	55	0.492007	1.42534	6.88317	0.349226	250	0.99027	0.98653	0.98552	0.98426	0.98328	0.98248	0.98165	151	42061408172	41136219971	39448615610
122334			M8-1																	217673058	0.999472	0.002658		211	56	0.49251	1.39894	6.80687	0.264805	250	0.98941	0.98565	0.98458	0.98321	0.98207	0.98113	0.98008	151	32868631758	32133562092	30801200942
122334			M8-2																	273271404	0.999454	0.002763		213	56	0.492246	1.39975	6.6504	0.28375	250	0.98988	0.98594	0.98489	0.98364	0.98268	0.98183	0.981	151	41263982004	40303705701	38576174378
122334			M8-3																	203900905	0.99935	0.002864		210	55	0.489627	1.40162	6.83408	0.280973	250	0.98926	0.98537	0.98423	0.98275	0.98156	0.98047	0.97913	151	30789036655	30045541297	28730918317
122343			D5-1																	61784159	0.99882	0.002617		306	43	0.670528	1.73251	3.70092	2.5986	93	0.98188	0.97208	0.96134	0.91332	0.78794	0.61247	0.44664	150	9267623850	9090411542	8766894555
122343			D5-2																	57708140	0.998854	0.002812		306	43	0.671747	1.77092	5.9141	2.14452	86	0.98244	0.97357	0.96184	0.89464	0.73845	0.55476	0.39342	150	8656221000	8485103545	8178364845
122343			D5-3																	61900427	0.998941	0.002685		309	43	0.676247	1.75087	5.11851	2.26341	93	0.98265	0.97457	0.96445	0.91408	0.78688	0.61451	0.45275	150	9285064050	9112994690	8799506661
122343			D6-1																	58564080	0.998629	0.002925		304	44	0.668892	1.78875	6.03474	2.0761	87	0.98258	0.9739	0.96251	0.89741	0.744	0.56177	0.40098	150	8784612000	8602684526	8284641953
122343			D6-2																	59744882	0.998828	0.002788		307	42	0.674195	1.74341	4.85259	2.27974	90	0.98249	0.97379	0.96301	0.90761	0.76916	0.5892	0.42503	150	8961732300	8787110565	8475084438
122343			D6-3																	58860729	0.998682	0.002968		307	42	0.674639	1.74893	5.39163	2.11865	88	0.98274	0.97482	0.96389	0.90315	0.75686	0.57586	0.41332	150	8829109350	8643794135	8317535534
122343			F7-1																	64894093	0.998916	0.002505		307	43	0.67041	1.73192	3.88014	2.50377	97	0.98347	0.97477	0.96476	0.91933	0.80685	0.643	0.48123	150	9734113950	9557954592	9228735208
122343			F7-2																	61336494	0.998801	0.002842		304	43	0.66891	1.77582	5.55823	2.14427	91	0.98378	0.97548	0.96452	0.90571	0.76867	0.59387	0.43426	150	9200474100	9017579643	8691560827
122343			F7-3																	55048267	0.998828	0.002841		309	42	0.674553	1.72867	4.24336	2.37295	83	0.98362	0.97456	0.96137	0.88897	0.72392	0.52947	0.36386	150	8257240050	8092710372	7799484732
122343			M8-1																	64528053	0.999053	0.002319		306	43	0.672796	1.72864	4.10751	2.46023	97	0.9826	0.97416	0.96439	0.92048	0.80725	0.64272	0.48084	150	9679207950	9519863832	9210552485
122343			M8-2																	60500567	0.998837	0.002819		311	42	0.676936	1.71289	4.40193	2.44446	92	0.9823	0.97314	0.96248	0.91179	0.781	0.60349	0.4378	150	9075085050	8895076916	8567860704
122343			M8-3																	63820567	0.998628	0.002961		311	42	0.677602	1.74846	5.08068	2.20838	96	0.98265	0.97447	0.96502	0.92036	0.80316	0.63713	0.47696	150	9573085050	9372947509	9024159505
125206			D5-1																	13282384	0.999543	0.004079		232	33	0.612826	2.53227	10.9476	1.71418	73	0.99541	0.96483	0.9088	0.75955	0.59792	0.452	0.33567	150	1992357600	1947067835	1864766158
125206			D5-2																	17975127	0.999466	0.004198		244	36	0.631295	2.47386	9.84596	2.04522	103	0.99624	0.97918	0.94706	0.8566	0.74638	0.63017	0.51865	150	2696269050	2632900827	2517869609
125206			D5-3																	13208902	0.999463	0.00421		233	33	0.613448	2.52112	10.7851	1.74871	73	0.99524	0.96527	0.90965	0.7609	0.59942	0.45368	0.33513	150	1981335300	1934647252	1850643846
125206			D6-1																	19257826	0.999453	0.004236		247	37	0.636446	2.47389	10.0647	1.98991	111	0.9964	0.98121	0.9528	0.8708	0.76999	0.6614	0.55594	150	2888673900	2819339470	2695303792
125206			D6-2																	14655870	0.999454	0.004164		254	40	0.64806	2.52664	12.0469	1.37444	85	0.99637	0.973	0.93002	0.81027	0.67056	0.53511	0.4185	150	2198380500	2146978676	2054823832
125206			D6-3																	16185398	0.999539	0.004229		243	35	0.630198	2.52786	12.1324	1.42637	92	0.99593	0.97378	0.93443	0.82593	0.69724	0.57073	0.45764	150	2427809700	2369791433	2264519194
125206			F7-1																	16109897	0.999524	0.00402		248	39	0.638294	2.49161	9.9094	2.18679	93	0.9964	0.97603	0.93766	0.83158	0.70448	0.5772	0.462	150	2416484550	2359283446	2255685205
125206			F7-2																	18012492	0.999444	0.003963		250	38	0.640956	2.51746	10.186	2.05533	104	0.99639	0.97992	0.94818	0.85855	0.74746	0.63252	0.52346	150	2701873800	2639482284	2526652068
125206			F7-3																	11912815	0.999436	0.003971		250	37	0.641364	2.52408	11.6328	1.49115	68	0.99573	0.96435	0.90468	0.74224	0.57017	0.42142	0.30586	150	1786922250	1745676024	1671514431
125206			M8-1																	14800952	0.999541	0.003835		235	34	0.617387	2.48962	9.72739	2.15976	83	0.99569	0.97116	0.92511	0.80242	0.65983	0.52109	0.40145	150	2220142800	2170877922	2080734767
125206			M8-2																	14263710	0.999625	0.003408		216	30	0.587981	2.53654	8.47686	2.89984	75	0.99436	0.96307	0.90891	0.76724	0.61127	0.46859	0.3511	150	2139556500	2101779605	2026028507
125206			M8-3																	13414276	0.999518	0.003948		237	35	0.620654	2.52052	10.7913	1.65983	75	0.99556	0.96812	0.91609	0.77452	0.61555	0.47099	0.35294	150	2012141400	1965649777	1881474870
126176			D5-1																	68530903	0.999473	0.002709		223	34	0.498568	1.71451	11.8114	0.422413	116	0.99	0.98796	0.98621	0.96413	0.88661	0.76224	0.61826	150	10279635450	10056151160	9675196898
126176			D5-2																	59004870	0.99928	0.002749		213	32	0.481759	1.80516	13.8606	0.521737	95	0.98966	0.98735	0.98288	0.92484	0.7895	0.62254	0.46485	150	8850730500	8654668446	8327744347
126176			D5-3																	60772594	0.999354	0.002717		220	33	0.490593	1.75103	12.6189	0.468674	101	0.98986	0.98764	0.98464	0.94251	0.82682	0.66955	0.50976	150	9115889100	8917388898	8585741941
126176			D6-1																	63467164	0.999348	0.002829		224	35	0.50039	1.75829	12.6593	0.468356	108	0.99016	0.98796	0.98543	0.95106	0.85183	0.70918	0.55837	150	9520074600	9305302772	8943246730
126176			D6-2																	46568304	0.999449	0.002626		222	34	0.494986	1.6928	10.7861	0.277439	79	0.98974	0.98726	0.9807	0.89502	0.70753	0.49316	0.30667	150	6985245600	6838015708	6584454494
126176			D6-3																	46638551	0.999419	0.002709		223	34	0.495326	1.69723	11.1113	0.275666	79	0.98985	0.98725	0.98016	0.89283	0.70573	0.49465	0.31205	150	6995782650	6842929902	6577529539
126176			F7-1																	43126366	0.999376	0.002787		219	35	0.491439	1.79895	12.138	0.386386	71	0.9908	0.98742	0.97275	0.84516	0.63013	0.41915	0.25314	150	6468954900	6323525724	6077339652
126176			F7-2																	64651822	0.999507	0.002576		211	31	0.477778	1.6842	10.637	0.309741	106	0.99052	0.9884	0.98552	0.95287	0.85639	0.71181	0.55217	150	9697773300	9499597703	9154516191
126176			F7-3																	50275579	0.999376	0.002758		220	33	0.492627	1.92891	15.147	0.674944	81	0.99067	0.98766	0.97485	0.86812	0.69135	0.51284	0.36467	150	7541336850	7374927248	7096648724
126176			M8-1																	46411005	0.999409	0.002681		220	33	0.490823	1.73751	12.1716	0.41252	77	0.98965	0.98716	0.97912	0.88147	0.6864	0.47666	0.30161	150	6961650750	6812934271	6559686424
126176			M8-2																	62059224	0.999294	0.002749		223	35	0.499627	2.00705	16.9127	0.793517	100	0.99015	0.98774	0.98147	0.91438	0.78514	0.63845	0.50514	150	9308883600	9106819538	8771801988
126176			M8-3																	52824063	0.999287	0.0028		218	33	0.489946	1.82793	13.8539	0.539513	86	0.98982	0.98732	0.98045	0.9008	0.73864	0.55675	0.39574	150	7923609450	7744072091	7447164495
130008			D5-1																	58615296	0.998855	0.002815		227	49	0.542387	2.41066	5.50579	5.045	68	0.92712	0.89586	0.87419	0.75689	0.57307	0.41089	0.29219	150	8792294400	8578831836	8214913344
130008			D5-2																	55079895	0.998739	0.002727		227	49	0.54159	2.32605	5.15981	5.86494	65	0.93519	0.89601	0.87303	0.74325	0.54655	0.3807	0.26327	150	8261984250	8065140416	7728042184
130008			D5-3																	54184953	0.998645	0.002894		226	50	0.542442	2.35518	5.4357	4.77672	63	0.92859	0.89554	0.87068	0.73219	0.5309	0.36619	0.25145	150	8127742950	7923337605	7581695447
130008			D6-1																	61742315	0.99872	0.002743		220	47	0.534516	2.49663	5.36619	5.5271	70	0.92721	0.89486	0.87335	0.76164	0.58711	0.42823	0.30918	150	9261347250	9037038506	8651882722
130008			D6-2																	60410379	0.998733	0.002794		224	48	0.539317	2.40032	5.42652	5.05011	70	0.92801	0.89591	0.87511	0.76423	0.58615	0.42431	0.30407	150	9061556850	8840662954	8465092190
130008			D6-3																	52239887	0.998756	0.002792		224	49	0.538017	2.39508	5.41775	4.84815	60	0.9271	0.8938	0.86543	0.71188	0.50554	0.34408	0.2336	150	7835983050	7645008613	7320937777
130008			F7-1																	55657619	0.998827	0.00273		224	49	0.536511	2.46689	5.1833	5.49271	63	0.92708	0.89519	0.86974	0.73189	0.53454	0.37217	0.25861	150	8348642850	8149547224	7807831002
130008			F7-2																	52195067	0.998746	0.002816		224	49	0.535834	2.45836	5.21211	5.32902	59	0.92618	0.89411	0.86482	0.70648	0.49815	0.33707	0.2289	150	7829260050	7633933360	7304573054
130008			F7-3																	56101222	0.998821	0.002643		224	48	0.534447	2.40573	5.29948	5.17039	64	0.92712	0.89524	0.87033	0.73452	0.53767	0.37484	0.26084	150	8415183300	8219836049	7882347663
130008			M8-1																	54626680	0.998779	0.002875		222	48	0.534409	2.41037	5.49573	5.09167	62	0.92607	0.89399	0.86728	0.72361	0.52455	0.36396	0.25098	150	8194002000	7987463299	7639762071
130008			M8-2																	61496872	0.998517	0.003025		224	49	0.531454	2.47393	5.29347	5.91831	69	0.92912	0.89553	0.87357	0.75839	0.58116	0.4229	0.3052	150	9224530800	8977951555	8567356305
130008			M8-3																	57746555	0.998781	0.002753		224	49	0.535746	2.409	5.30914	5.52531	66	0.92715	0.89513	0.87189	0.74568	0.55759	0.39603	0.2791	150	8661983250	8452323741	8094585268
130207			D5-1																	106520253	0.999978	0.003876		203	38	0.511698	2.62157	5.92205	2.54251	112	0.92724	0.8995	0.89015	0.85224	0.77375	0.66866	0.56064	150	15978037950	15551269221	14745169508
130207			D5-2																	102991367	0.999961	0.003772		215	38	0.517958	2.57846	5.59231	3.00669	112	0.92829	0.89988	0.89071	0.85349	0.77604	0.67146	0.56386	150	15448705050	15046333211	14274463412
130207			D5-3																	104418216	0.999959	0.00381		209	38	0.513399	2.58541	5.89776	2.47178	112	0.92771	0.8998	0.89069	0.85318	0.77461	0.66915	0.56093	150	15662732400	15254049478	14478388620
130207			D6-1																	82836688	0.999958	0.004125		198	37	0.506796	2.66888	5.46524	3.40995	85	0.92184	0.89603	0.88007	0.80316	0.67207	0.53432	0.4171	150	12425503200	12062729288	11376262961
130207			D6-2																	84285439	0.999959	0.004239		207	38	0.511542	2.63155	6.31144	2.30966	90	0.92296	0.89715	0.8834	0.8175	0.6967	0.56319	0.44472	150	12642815850	12262632260	11547306900
130207			D6-3																	67537732	0.999966	0.004577		205	36	0.506848	2.68493	5.63588	3.0369	71	0.92046	0.89426	0.87155	0.7569	0.58877	0.43872	0.32375	150	10130659800	9801159996	9196933278
130207			F7-1																	103921190	0.99997	0.003888		198	37	0.506251	2.61411	5.67162	2.63936	108	0.92615	0.89954	0.88962	0.84719	0.76189	0.65157	0.54104	150	15588178500	15166946669	14372761942
130207			F7-2																	93575116	0.999974	0.003797		206	37	0.506013	2.65384	5.2786	3.74931	98	0.92568	0.89852	0.88656	0.83346	0.73127	0.60925	0.49455	150	14036267400	13668056367	12967852016
130207			F7-3																	76669770	0.999968	0.004432		207	37	0.506668	2.6022	6.28775	2.30179	81	0.92187	0.89673	0.88032	0.79661	0.65458	0.50969	0.3898	150	11500465500	11137601970	10468544251
130207			M8-1																	103190772	0.999963	0.003798		199	37	0.506844	2.64827	5.60093	3.09587	107	0.92766	0.89888	0.88854	0.84488	0.75787	0.64653	0.53637	150	15478615800	15071156091	14296012984
130207			M8-2																	78486419	0.999974	0.00362		204	37	0.50702	2.66565	5.98422	2.58973	82	0.92101	0.89592	0.87943	0.79755	0.65939	0.51751	0.39921	150	11772962850	11477554907	10900313610
130207			M8-3																	63921307	0.99997	0.00464		205	37	0.503018	2.6756	5.71752	2.95834	67	0.92054	0.89294	0.86659	0.73582	0.55783	0.4067	0.2949	150	9588196050	9266632034	8671692009
301157	1		D5-1
301157	1		D5-2
301157	1		D5-3
301157	1		D6-1
301157	1		D6-2
301157	1		D6-3
301157	1		F7-1
301157	1		F7-2
301157	1		F7-3
301157	1		M8-1
301157	1		M8-2
301157	1		M8-3
302073			D5-1																	46864562	0.999424	0.00197		235	49	0.48588	1.69799	2.44856	2.29555	82	0.98475	0.97189	0.95329	0.87278	0.71956	0.52696	0.3465	150	7029684300	6916844226	6690130563
302073			D5-2																	48882954	0.999359	0.002022		232	52	0.488421	1.70279	3.23738	2.15743	84	0.9845	0.97223	0.95425	0.8774	0.73084	0.54537	0.36717	150	7332443100	7209503798	6967226399
302073			D5-3																	66388643	0.99932	0.001958		235	52	0.490308	1.7218	4.41867	1.64031	116	0.98514	0.97623	0.96579	0.92826	0.8557	0.74443	0.61032	150	9958296450	9801131528	9486855190
302073			D6-1																	54209398	0.99931	0.002066		242	52	0.491142	1.69382	2.53527	2.21876	97	0.98494	0.97407	0.96	0.90497	0.7964	0.6429	0.47699	150	8131409700	7993919939	7720075452
302073			D6-2																	55374865	0.999373	0.002033		241	52	0.492695	1.70557	3.36693	1.84083	98	0.98503	0.97493	0.96173	0.90888	0.80331	0.65264	0.49005	150	8306229750	8169175759	7895056966
302073			D6-3																	52439890	0.999297	0.002092		237	53	0.490837	1.71405	3.52323	1.88644	92	0.98478	0.9735	0.95823	0.89525	0.77163	0.60476	0.43416	150	7865983500	7729552642	7462341199
302073			F7-1																	52945033	0.999302	0.002077		241	51	0.489974	1.70626	2.73783	1.98875	93	0.9857	0.97475	0.95975	0.89821	0.77891	0.61744	0.45149	150	7941754950	7807307088	7539023185
302073			F7-2																	51430509	0.999335	0.002071		238	50	0.48742	1.70612	2.61529	2.13357	90	0.98554	0.97414	0.95814	0.89109	0.76281	0.5937	0.42392	150	7714576350	7584237985	7324860560
302073			F7-3																	51414455	0.999371	0.002092		235	52	0.489085	1.73338	3.14785	2.12936	89	0.98563	0.97376	0.95713	0.88745	0.75577	0.58379	0.41394	150	7712168250	7578099457	7316050469
302073			M8-1																	50959880	0.99932	0.002215		239	51	0.488683	1.6942	2.57495	2.22661	90	0.98483	0.97342	0.95744	0.89149	0.76378	0.59228	0.41933	150	7643982000	7502834932	7226895702
302073			M8-2																	50119724	0.999391	0.002014		233	51	0.487555	1.71542	3.13519	2.21749	87	0.98473	0.97238	0.95518	0.88405	0.74736	0.5684	0.3926	150	7517958600	7393341216	7145079199
302073			M8-3																	53715143	0.999418	0.001984		232	52	0.488977	1.71653	3.92847	1.86843	93	0.98484	0.97371	0.95832	0.89667	0.77699	0.61451	0.44648	150	8057271450	7926326533	7666958474
302077	2		D5-1
302077	2		D5-2
302077	2		D5-3
302077	2		D6-1
302077	2		D6-2
302077	2		D6-3
302077	2		F7-1
302077	2		F7-2
302077	2		F7-3
302077	2		M8-1
302077	2		M8-2
302077	2		M8-3
302087			D5-1																	50882001	0.998951	0.003186		195	55	0.468699	1.47167	0.627158	1.70817	82	0.98858	0.98526	0.9815	0.93896	0.78876	0.53746	0.29491	150	7632300150	7422935829	7072452194
302087			D5-2																	42546697	0.999279	0.002737		179	48	0.466134	1.50084	3.3358	0.10309	65	0.98766	0.98372	0.97482	0.86911	0.59068	0.2914	0.12144	150	6382004550	6214719890	5935308929
302087			D5-3																	46580022	0.999343	0.002656		194	54	0.470499	1.48625	1.42763	1.01996	75	0.98828	0.98491	0.97987	0.91908	0.72303	0.43893	0.2121	150	6987003300	6816326483	6512608133
302087			D6-1																	48015233	0.999154	0.002985		177	47	0.459233	1.47447	0.101637	2.23108	73	0.98776	0.98443	0.97952	0.91247	0.69541	0.39921	0.18478	150	7202284950	7005722801	6686267551
302087			D6-2																	47442356	0.999399	0.002672		192	55	0.4687	1.47968	0.323784	1.83105	76	0.98841	0.98526	0.981	0.92423	0.73459	0.45219	0.22123	150	7116353400	6946281608	6638742312
302087			D6-3																	60910156	0.999221	0.002681		185	51	0.465721	1.46982	0.814814	1.37388	95	0.98826	0.98539	0.98301	0.95981	0.86919	0.68399	0.4535	150	9136523400	8899996442	8493698786
302087			F7-1																	62277819	0.999301	0.002918		191	53	0.460419	1.45819	0.0114336	2.96691	99	0.98942	0.98655	0.98446	0.96547	0.8858	0.71531	0.48972	150	9341672850	9110178454	8696431663
302087			F7-2																	39540608	0.999225	0.002877		183	49	0.463125	1.47538	2.57849	0.437537	61	0.98866	0.98483	0.97509	0.84942	0.52903	0.22656	0.083517	150	5931091200	5785751543	5529951030
302087			F7-3																	46697982	0.999379	0.00253		182	49	0.463834	1.47844	1.93944	0.455383	72	0.98876	0.9854	0.98029	0.91377	0.69349	0.39217	0.17308	150	7004697300	6842624982	6549587864
302087			M8-1																	63263217	0.999185	0.002549		187	53	0.464685	1.4672	0.139139	2.77026	99	0.98867	0.98592	0.98381	0.96429	0.88443	0.71686	0.49656	150	9489482550	9261189925	8852507172
302087			M8-2																	57421501	0.999351	0.002484		180	49	0.466052	1.47333	1.70919	1.04404	88	0.98833	0.98543	0.98243	0.95109	0.83202	0.61163	0.36894	150	8613225150	8415615520	8070129283
302087			M8-3																	60520831	0.999175	0.002707		185	51	0.464784	1.47658	1.58379	1.00991	95	0.9885	0.98563	0.98308	0.9586	0.86393	0.67514	0.44368	150	9078124650	8859387277	8469390632
303033			D5-1																	87798444	0.999082	0.002617		202	63	0.556315	1.49503	0.251249	1.89332	131	0.98953	0.98705	0.98542	0.97805	0.94732	0.87585	0.75392	150	13169766600	12834980668	12266767181
303033			D5-2																	79950527	0.999118	0.002477		197	61	0.553965	1.49242	0.148807	2.70722	117	0.98932	0.98669	0.98479	0.97336	0.92656	0.82293	0.66282	150	11992579050	11697586682	11194165331
303033			D5-3																	94185923	0.999179	0.002508		204	64	0.556419	1.49267	0.178151	2.51364	142	0.9897	0.98719	0.98562	0.97998	0.95688	0.90124	0.80387	150	14127888450	13741339233	13153804411
303033			D6-1																	74735335	0.999192	0.002494		200	63	0.556966	1.50096	0.224578	2.22729	111	0.98942	0.98678	0.98496	0.97067	0.91347	0.79016	0.61087	150	11210300250	10915192902	10441679452
303033			D6-2																	102770685	0.999046	0.002731		203	64	0.555905	1.48939	0.168658	2.60371	154	0.9897	0.98733	0.9861	0.98202	0.96568	0.92403	0.84871	150	15415602750	15001811716	14308017623
303033			D6-3																	99832215	0.999217	0.002435		206	65	0.558356	1.49503	0.134718	3.06132	151	0.98973	0.98737	0.98613	0.98176	0.9636	0.91839	0.83775	150	14974832250	14608405780	13989666509
303033			F7-1																	87760445	0.999191	0.002567		200	62	0.553077	1.48137	0.258705	2.07067	130	0.99037	0.98801	0.98656	0.97949	0.94908	0.87669	0.75019	150	13164066750	12829014487	12257550764
303033			F7-2																	92944148	0.999102	0.002579		201	63	0.554044	1.47476	0.286998	1.70616	138	0.99046	0.98812	0.98681	0.98113	0.95769	0.89989	0.79506	150	13941622200	13577603338	12982450279
303033			F7-3																	101390256	0.999187	0.002514		202	63	0.553911	1.47612	0.247512	2.0505	151	0.99054	0.98825	0.98703	0.9829	0.96675	0.92491	0.84711	150	15208538400	14832963838	14192680068
303033			M8-1																	80634461	0.999101	0.002695		196	62	0.552994	1.49699	0.172306	2.68898	117	0.98951	0.98697	0.98527	0.97405	0.92629	0.82239	0.66142	150	12095169150	11765389747	11228386157
303033			M8-2																	77414078	0.998945	0.002593		206	64	0.553485	1.50395	0.173173	2.57745	117	0.98968	0.9872	0.98547	0.9736	0.92534	0.81959	0.65669	150	11612111700	11287772882	10799120180
303033			M8-3																	116111445	0.999141	0.002517		206	64	0.552868	1.49823	0.114659	3.89048	174	0.98984	0.98769	0.98656	0.98365	0.9738	0.94617	0.89485	150	17416716750	16967041343	16221404365
312006			D5-1																	75558030	0.998696	0.002631		221	63	0.591113	1.41691	0.925191	0.889336	123	0.98889	0.98548	0.9838	0.97672	0.94444	0.85844	0.71459	150	11333704500	11125903105	10721053705
312006			D5-2																	72682956	0.998624	0.002692		229	67	0.594878	1.42024	1.20959	0.531079	120	0.98911	0.98567	0.98399	0.97645	0.94114	0.8483	0.69662	150	10902443400	10696574876	10299404309
312006			D5-3																	65505970	0.998424	0.002904		235	69	0.595096	1.41985	1.0886	0.645818	109	0.98916	0.98563	0.98374	0.97264	0.91939	0.79398	0.6058	150	9825895500	9617361390	9230856630
312006			D6-1																	80323290	0.998572	0.002764		224	65	0.5922	1.42158	0.754843	1.2623	131	0.98901	0.98567	0.98409	0.97849	0.95432	0.88621	0.76577	150	12048493500	11809332147	11358632221
312006			D6-2																	68521878	0.998691	0.002827		211	60	0.585951	1.42598	1.03588	0.552719	109	0.98844	0.98493	0.98302	0.97196	0.9189	0.7906	0.59958	150	10278281700	10067176582	9674863059
312006			D6-3																	61450753	0.99873	0.002663		231	68	0.597095	1.41711	0.707433	1.54694	102	0.98897	0.98534	0.98331	0.96844	0.89813	0.74421	0.52896	150	9217612950	9046006107	8709263886
312006			F7-1																	74016495	0.998599	0.002841		230	68	0.595599	1.44612	0.939933	0.821267	122	0.98996	0.98674	0.98503	0.976	0.93718	0.84416	0.70086	150	11102474250	10869746135	10450733004
312006			F7-2																	70265926	0.998281	0.002768		228	67	0.59438	1.44558	0.801495	1.10272	115	0.98997	0.98655	0.98469	0.97337	0.92485	0.81383	0.6515	150	10539888900	10333966085	9941875552
312006			F7-3																	77551706	0.998666	0.002744		227	66	0.59339	1.44855	0.830484	0.948817	128	0.98995	0.9867	0.9851	0.97777	0.94596	0.86564	0.7363	150	11632755900	11414343663	10992123496
312006			M8-1																	70488417	0.998639	0.002828		227	67	0.5939	1.41776	0.901087	0.931414	116	0.9892	0.98577	0.984	0.97506	0.93314	0.82766	0.66163	150	10573262550	10350664825	9948870553
312006			M8-2																	73931069	0.998728	0.002872		228	66	0.592947	1.42418	0.946009	0.826133	122	0.98915	0.98586	0.98422	0.97695	0.94311	0.85384	0.70658	150	11089660350	10856975679	10430346426
312006			M8-3																	70206226	0.998671	0.002636		229	66	0.594034	1.41543	0.922505	0.881672	116	0.98914	0.98582	0.98404	0.97539	0.93399	0.82922	0.66344	150	10530933900	10335448038	9956202457
313004	1		D5-1
313004	1		D5-2
313004	1		D5-3
313004	1		D6-1
313004	1		D6-2
313004	1		D6-3
313004	1		F7-1
313004	1		F7-2
313004	1		F7-3
313004	1		M8-1
313004	1		M8-2
313004	1		M8-3
314133			D5-1																	68488011	0.999368	0.002201		231	34	0.604237	2.55158	14.3637	1.11845	84	0.9789	0.9482	0.90337	0.78758	0.65571	0.52708	0.41383	150	10273201650	10091384913	9749762631
314133			D5-2																	58294888	0.999537	0.002218		242	37	0.618528	2.4728	12.4346	1.374	75	0.97902	0.9462	0.89561	0.76191	0.61119	0.46838	0.34925	150	8744233200	8583382896	8267369181
314133			D5-3																	61748915	0.999616	0.002046		238	35	0.613347	2.46096	11.764	1.54692	79	0.97899	0.94871	0.90209	0.77875	0.63633	0.4973	0.37713	150	9262337250	9106385282	8792412173
314133			D6-1																	56999663	0.999538	0.002068		243	35	0.62068	2.42584	11.9669	1.44515	74	0.97891	0.94618	0.8952	0.7603	0.6069	0.46163	0.34062	150	8549949450	8405131394	8115204834
314133			D6-2																	59617258	0.999607	0.002048		236	33	0.610008	2.42576	12.649	1.40193	76	0.97846	0.9455	0.89559	0.7639	0.6148	0.47355	0.35422	150	8942588700	8792247378	8491933887
314133			D6-3																	59711049	0.999483	0.002254		240	35	0.615901	2.52126	13.786	1.19295	76	0.97874	0.94536	0.89521	0.76374	0.61577	0.47602	0.35855	150	8956657350	8790478066	8467439665
314133			F7-1																	53716384	0.999071	0.002547		277	48	0.659144	2.42738	11.8473	1.55151	73	0.98183	0.9491	0.89764	0.75881	0.60312	0.45758	0.33729	150	8057457600	7888123636	7583616851
314133			F7-2																	72837258	0.999566	0.00212		249	36	0.628838	2.45715	12.9534	1.27419	95	0.98084	0.95655	0.91983	0.82302	0.70723	0.58773	0.47616	150	10925588700	10736307643	10355127957
314133			F7-3																	60108028	0.999383	0.002213		213	31	0.578962	2.76191	15.9489	0.99367	68	0.97821	0.93311	0.8681	0.71387	0.55783	0.42277	0.31506	150	9016204200	8849802894	8536868777
314133			M8-1																	58388562	0.99931	0.002315		262	42	0.645589	2.38606	11.4411	1.61562	79	0.98032	0.95092	0.90449	0.77985	0.63442	0.49389	0.37326	150	8758284300	8591484372	8283375548
314133			M8-2																	57485803	0.999575	0.002145		253	38	0.634357	2.43491	12.2939	1.50734	76	0.97947	0.94727	0.89791	0.76728	0.61835	0.47628	0.35651	150	8622870450	8468823819	8164735044
314133			M8-3																	62735778	0.999563	0.002184		249	37	0.628623	2.43504	11.6798	1.58449	83	0.97958	0.9512	0.9077	0.79153	0.65533	0.51946	0.39969	150	9410366700	9239043496	8899971375
321031			D5-1																	73130596	0.999556	0.002417		237	36	0.612089	2.56661	13.3763	1.34655	91	0.97911	0.95075	0.9105	0.80597	0.685	0.56313	0.45297	150	10969589400	10734900299	10300750275
321031			D5-2																	83114377	0.999435	0.00249		226	33	0.5939	2.58771	13.6307	1.35481	100	0.97863	0.95253	0.91618	0.8237	0.7159	0.60509	0.50063	150	12467156550	12195725994	11707489066
321031			D5-3																	77079897	0.999487	0.002408		230	34	0.600557	2.59234	13.8348	1.29059	94	0.97868	0.95086	0.91164	0.8113	0.69526	0.5778	0.46957	150	11561984550	11317435457	10873035237
321031			D6-1																	109516478	0.99944	0.002494		236	36	0.611415	2.66317	15.6775	1.04803	134	0.98002	0.96051	0.93503	0.87224	0.79772	0.71663	0.63435	150	16427471700	16072585143	15433977091
321031			D6-2																	99135881	0.999506	0.002434		226	33	0.594929	2.64198	15.3916	1.101	117	0.97906	0.95639	0.92598	0.85048	0.76218	0.66859	0.57686	150	14870382150	14556408247	13985002393
321031			D6-3																	73568461	0.999482	0.002532		231	35	0.603063	2.60339	13.8772	1.35462	89	0.9786	0.94872	0.90615	0.7988	0.67653	0.55507	0.4454	150	11035269150	10789002674	10349177324
321031			F7-1																	85013049	0.999419	0.002621		236	37	0.609104	2.55236	12.7221	1.46586	105	0.98076	0.95711	0.92419	0.83925	0.73773	0.6315	0.52897	150	12751957350	12458315977	11937599130
321031			F7-2																	72277348	0.999435	0.002577		233	34	0.605147	2.62981	14.1387	1.27581	88	0.97976	0.94915	0.90561	0.79516	0.67051	0.548	0.43816	150	10841602200	10597376195	10162011628
321031			F7-3																	87592624	0.999437	0.002386		236	37	0.611599	2.69642	17.7093	0.821606	107	0.98086	0.9541	0.91854	0.83158	0.73226	0.63014	0.53331	150	13138893600	12875980206	12391537662
321031			M8-1																	79935195	0.999533	0.002457		240	37	0.614643	2.52507	12.992	1.45564	101	0.97955	0.95436	0.9196	0.82962	0.72297	0.61194	0.50582	150	11990279250	11730385516	11258237295
321031			M8-2																	88432197	0.999537	0.00241		230	34	0.601118	2.56843	13.1956	1.43317	108	0.97929	0.95583	0.92352	0.84128	0.74356	0.64008	0.54016	150	13264829550	12982345421	12468555789
321031			M8-3																	82697174	0.999385	0.002497		229	34	0.600209	2.60244	15.2125	1.08365	100	0.97903	0.95189	0.91468	0.82182	0.71429	0.60416	0.50118	150	12404576100	12136603520	11656472185
322021			D5-1																	80203764	0.999546	0.002337		240	37	0.616485	2.65203	15.0623	1.35395	99	0.97835	0.95035	0.9139	0.82184	0.71429	0.60376	0.49993	150	12030564600	11787913341	11337675029
322021			D5-2																	77961880	0.999473	0.002542		269	48	0.647757	2.44556	10.7664	2.1514	105	0.98	0.95628	0.92548	0.84376	0.74311	0.63517	0.52972	150	11694282000	11436315922	10963761755
322021			D5-3																	96916197	0.999467	0.002403		251	41	0.629531	2.51002	12.7052	1.6498	126	0.97982	0.95948	0.93388	0.86915	0.79006	0.70282	0.61323	150	14537429550	14235734868	13678207367
322021			D6-1																	83528899	0.999423	0.002415		234	37	0.608029	2.60868	14.8622	1.32325	103	0.97854	0.9517	0.91701	0.8294	0.72574	0.61808	0.5155	150	12529334850	12268941274	11789521519
322021			D6-2																	85604020	0.999489	0.002438		233	35	0.60585	2.60993	14.6554	1.29774	104	0.97858	0.95283	0.91819	0.83172	0.73006	0.62451	0.52359	150	12840603000	12572286895	12081035518
322021			D6-3																	92533505	0.999445	0.002345		217	31	0.579419	2.48825	12.0435	1.6565	111	0.9781	0.95563	0.92523	0.84727	0.75325	0.65211	0.55223	150	13880025750	13598222467	13076167976
322021			F7-1																	77842117	0.999491	0.002312		229	33	0.598795	2.55211	13.5675	1.49407	95	0.97871	0.95023	0.91183	0.81396	0.6998	0.58395	0.47601	150	11676317550	11441754055	11006777223
322021			F7-2																	80532606	0.999517	0.002357		234	35	0.606826	2.56452	13.3427	1.42911	100	0.97976	0.95367	0.91802	0.82661	0.71865	0.60713	0.50162	150	12079890900	11837250635	11386551613
322021			F7-3																	77187937	0.999547	0.002317		229	34	0.599098	2.59046	13.9451	1.38901	93	0.97932	0.95049	0.91044	0.80927	0.69275	0.57553	0.46839	150	11578190550	11345601477	10913854420
322021			M8-1																	78005396	0.999504	0.002393		229	34	0.59966	2.62066	14.2218	1.41945	95	0.97762	0.94867	0.90971	0.81169	0.69809	0.58279	0.47599	150	11700809400	11459972464	11017272284
322021			M8-2																	77209532	0.999532	0.00229		226	33	0.593949	2.51065	12.7707	1.54888	94	0.97811	0.95017	0.91174	0.81264	0.69669	0.5784	0.46882	150	11581429800	11351665120	10924836616
322021			M8-3																	73865215	0.999542	0.002438		229	33	0.597763	2.53137	12.6818	1.56053	91	0.97793	0.94942	0.90934	0.80589	0.68516	0.56354	0.45156	150	11079782250	10844475077	10412916106
322024			D5-1																	187028110	0.999048	0.003889		217	58	0.485079	1.32657	3.86315	0.253604	250	0.98943	0.98541	0.98427	0.9828	0.98164	0.98058	0.97944	151	28241244610	27265645110	25736354480
322024			D5-2																	224164631	0.99895	0.003966		211	56	0.482309	1.32571	4.07932	0.291533	250	0.9896	0.9855	0.98436	0.98299	0.98194	0.98102	0.98011	151	33848859281	32653081640	30801082382
322024			D5-3																	202810635	0.998943	0.003927		215	58	0.4857	1.33234	4.10176	0.286254	250	0.98959	0.98554	0.98438	0.98293	0.98184	0.98082	0.97982	151	30624405885	29559532228	27905586428
322024			D6-1																	186276773	0.998898	0.004106		218	59	0.4873	1.3299	4.13555	0.32817	250	0.98954	0.98551	0.98432	0.98286	0.9817	0.98065	0.97949	151	28127792723	27110045344	25549641913
322024			D6-2																	178044586	0.998832	0.004081		213	57	0.483758	1.32185	3.58521	0.288112	250	0.98943	0.98518	0.98404	0.98251	0.98131	0.98016	0.97886	151	26884732486	25909746281	24415664892
322024			D6-3																	218364330	0.998578	0.003934		213	57	0.484212	1.32785	4.09119	0.281875	250	0.98969	0.98553	0.98437	0.983	0.98193	0.98099	0.98007	151	32973013830	31815066428	30019947864
322024			F7-1																	175217120	0.999006	0.003897		216	58	0.485428	1.35174	4.08357	0.353037	250	0.99007	0.98617	0.985	0.98346	0.98224	0.98101	0.97927	151	26457785120	25540388615	24104741929
322024			F7-2																	183812581	0.999022	0.003859		204	52	0.476896	1.34242	3.76522	0.31748	250	0.98971	0.9857	0.98453	0.98296	0.98174	0.98056	0.97899	151	27755699731	26796016271	25300080024
322024			F7-3																	203362033	0.998465	0.003768		215	57	0.48257	1.3383	3.2511	0.302816	250	0.99024	0.98635	0.98524	0.98377	0.98261	0.9816	0.98044	151	30707666983	29677082244	28068932447
322024			M8-1																	184088048	0.99883	0.004093		215	57	0.481268	1.32248	3.32964	0.246053	250	0.9896	0.98553	0.98439	0.9829	0.98172	0.98067	0.97948	151	27797295248	26792522511	25255612634
322024			M8-2																	222072842	0.998959	0.003875		211	55	0.481275	1.3235	3.86893	0.254835	250	0.98955	0.98563	0.98453	0.98317	0.98213	0.98119	0.98025	151	33532999142	32377157775	30575425401
322024			M8-3																	206157992	0.998998	0.00385		212	55	0.47879	1.32556	3.90068	0.252604	250	0.98953	0.98557	0.98443	0.98302	0.9819	0.98095	0.97997	151	31129856792	30064324732	28399434278
322057			D5-1																	57252594	0.999996	0.005256		202	39	0.554769	1.53157	0	7.32262	112	0.98784	0.98407	0.98108	0.96168	0.89206	0.76657	0.60583	150	11604642900	11197605814	10484019832
322057			D5-2																	71076493	0.99998	0.005055		202	38	0.554026	1.53091	0	6.69623	129	0.9879	0.98446	0.98201	0.97092	0.92944	0.84283	0.71875	150	13330281150	12884432185	12121687461
322057			D5-3																	57063386	0.999989	0.005218		204	38	0.552099	1.53596	0	7.01609	109	0.98798	0.98395	0.98075	0.95895	0.88343	0.7504	0.58225	150	11226149250	10827131475	10146140210
322057			D6-1																	77364286	0.999996	0.005139		203	39	0.554467	1.53807	0	7.26852	83	0.98778	0.98341	0.97779	0.91932	0.76067	0.54126	0.32939	150	8587889100	8282457461	7749812440
322057			D6-2																	88868541	0.999995	0.005071		204	39	0.554329	1.53397	0	6.99561	107	0.98771	0.98414	0.98094	0.95775	0.87837	0.74063	0.56904	150	11030523150	10621903054	9916963181
322057			D6-3																	73688892	0.999979	0.005383		202	38	0.553763	1.55602	0	7.00967	83	0.9874	0.98327	0.97731	0.9172	0.75584	0.5342	0.32158	150	8559507900	8261663936	7747114779
322057			F7-1																	79403201	0.999996	0.006055		205	39	0.549681	1.54071	0	7.14776	115	0.98879	0.98528	0.98254	0.96572	0.90382	0.78537	0.62878	150	11910480150	11404511859	10531995652
322057			F7-2																	80273624	0.999996	0.005942		196	37	0.548862	1.52555	0	6.70208	117	0.98851	0.98509	0.98253	0.96736	0.91048	0.79838	0.64736	150	12459242250	11986663176	11172566651
322057			F7-3																	74840995	0.999988	0.005339		203	38	0.551986	1.53825	0	6.86175	103	0.98846	0.98495	0.98158	0.95628	0.86862	0.71674	0.53226	150	10661473950	10308052294	9699770798
322057			M8-1																	83061615	0.999996	0.005493		201	38	0.547803	1.54894	0	7.59093	115	0.98821	0.98441	0.98165	0.96334	0.8981	0.77932	0.6263	150	12041043600	11538419976	10669527139
322057			M8-2																	73536821	0.999994	0.005455		206	39	0.554284	1.53886	0	7.25328	108	0.98796	0.98437	0.98109	0.95774	0.87859	0.74199	0.57217	150	11053333800	10653059721	9964956102
322057			M8-3																	82562167	0.999993	0.00536		204	39	0.552448	1.53631	0	7.28878	120	0.98795	0.98458	0.98191	0.96638	0.91036	0.80414	0.6617	150	12384325050	11937342848	11166405093
402006	2		D5-1
402006	2		D5-2
402006	2		D5-3
402006	2		D6-1
402006	2		D6-2
402006	2		D6-3
402006	2		F7-1
402006	2		F7-2
402006	2		F7-3
402006	2		M8-1
402006	2		M8-2
402006	2		M8-3
000001_Nextseq			D5-1																	20390451	0.998955	0.004267		236	73	0.454595	1.24641	1.02912	2.79245	94	0.99033	0.9883	0.98664	0.98059	0.93537	0.74349	0.40503	150	3058567650	2851423084	2730265929
000001_Nextseq			D5-2																	20076825	0.999007	0.004326		239	75	0.453644	1.25782	0.831655	3.12988	93	0.99042	0.9883	0.98667	0.98002	0.92915	0.72512	0.38744	150	3011523750	2805030860	2684594636
000001_Nextseq			D5-3																	20555840	0.999022	0.004152		230	71	0.451281	1.29272	1.07396	2.65261	95	0.99361	0.99151	0.98946	0.97186	0.90045	0.72488	0.419	150	3083376000	2876918141	2755383627
000001_Nextseq			D6-1																	19990036	0.998991	0.004224		238	75	0.454823	1.25407	0.929333	2.74366	93	0.99053	0.98843	0.98673	0.98037	0.93106	0.72469	0.37817	150	2998505400	2789521423	2671719804
000001_Nextseq			D6-2																	20330529	0.998875	0.004363		236	74	0.452608	1.30131	1.14211	2.73194	94	0.99368	0.99162	0.98948	0.97146	0.89815	0.71826	0.41229	150	3049579350	2841931375	2721250772
000001_Nextseq			D6-3																	21547577	0.999008	0.004204		233	73	0.45298	1.24894	0.876374	3.0179	99	0.99028	0.98846	0.98689	0.9819	0.94777	0.79507	0.48892	150	3232136550	3010323847	2882190758
000001_Nextseq			F7-1																	19880338	0.998973	0.004335		237	74	0.454888	1.24793	0.924373	2.91443	92	0.99036	0.98829	0.9865	0.97967	0.92595	0.71418	0.37024	150	2982050700	2777624095	2658829986
000001_Nextseq			F7-2																	20958413	0.998989	0.004217		235	73	0.453414	1.24613	1.02012	2.88165	96	0.9916	0.98832	0.98684	0.98137	0.94189	0.7688	0.44543	150	3143761950	2931400426	2807641680
000001_Nextseq			F7-3																	21603235	0.998987	0.003912		224	69	0.451113	1.28587	1.29858	2.55544	98	0.99358	0.99155	0.98958	0.97482	0.91132	0.76106	0.47731	150	3240485250	3033596761	2911694711
000001_Nextseq			M8-1																	20252632	0.998957	0.004223		238	75	0.456264	1.24307	1.07046	2.63996	94	0.99089	0.98837	0.9866	0.98079	0.93697	0.74335	0.40179	150	3037894800	2833984509	2715537875
000001_Nextseq			M8-2																	21010381	0.998967	0.004543		239	75	0.453605	1.25203	1.14035	2.90975	97	0.99041	0.98856	0.98691	0.98159	0.94311	0.77437	0.45513	150	3151557150	2925936456	2796219884
000001_Nextseq			M8-3																	20139640	0.998958	0.004231		238	74	0.45471	1.24785	0.93074	3.05319	93	0.99049	0.98856	0.98686	0.98055	0.93108	0.72946	0.38965	150	3020946000	2817456598	2698590722
000001_Novaseq			D5-1																	100978082	0.999991	0.007051		202	37	0.534618	3.61507	2.74527	3.54133	88	0.91108	0.84051	0.811	0.73735	0.64457	0.5435	0.44879	150	15146712300	14539613611	13555253729
000001_Novaseq			D5-2																	98100309	0.999982	0.007046		214	38	0.542457	3.47906	2.0873	4.07181	90	0.91339	0.84351	0.81593	0.74425	0.65106	0.54916	0.45411	150	14715046350	14128616548	13171666273
000001_Novaseq			D5-3																	99916097	0.999982	0.006967		208	37	0.537839	3.6088	2.64052	3.54426	90	0.9126	0.84228	0.81388	0.74197	0.64998	0.54892	0.45396	150	14987414550	14398664923	13440822221
000001_Novaseq			D6-1																	86121778	0.99998	0.007637		198	37	0.527663	3.5575	1.65479	4.54759	73	0.90369	0.83327	0.79533	0.6987	0.58121	0.46628	0.36888	150	12918266700	12345870817	11425760575
000001_Novaseq			D6-2																	95704102	0.99998	0.007786		206	37	0.533885	3.53071	3.22966	3.18097	85	0.9081	0.83944	0.80851	0.73105	0.63311	0.5282	0.4321	150	14355615300	13705921588	12663560764
000001_Novaseq			D6-3																	68540846	0.999985	0.007955		205	36	0.530367	3.31503	2.12262	4.14633	60	0.89823	0.82754	0.77922	0.64994	0.50329	0.37765	0.28214	150	10281126900	9809038520	9059184759
000001_Novaseq			F7-1																	98668277	0.99999	0.006881		198	37	0.52883	3.70177	2.4631	3.70534	85	0.90759	0.83828	0.80645	0.72838	0.63171	0.52809	0.43285	150	14800241550	14216432982	13266493948
000001_Novaseq			F7-2																	86703057	0.99999	0.006848		205	36	0.530647	3.4987	1.4557	4.97334	76	0.90611	0.83676	0.80162	0.71034	0.59643	0.48251	0.38425	150	13005458550	12500175679	11672364307
000001_Novaseq			F7-3																	75285259	0.999987	0.007756		206	37	0.531479	3.38056	3.34311	3.11928	67	0.9002	0.83228	0.79046	0.68047	0.54754	0.42377	0.32433	150	11292788850	10787440064	9982360640
000001_Novaseq			M8-1																	101070028	0.999986	0.006823		198	37	0.530853	3.80844	1.91566	4.21806	87	0.91379	0.83948	0.8088	0.73315	0.6392	0.53793	0.44387	150	15160504200	14571350012	13608580884
000001_Novaseq			M8-2																	89382801	0.999979	0.006713		204	36	0.532272	3.50079	2.81125	3.57448	79	0.90507	0.83662	0.80225	0.71487	0.60632	0.49494	0.397	150	13407420150	12892751883	12035663887
000001_Novaseq			M8-3																	77296942	0.999987	0.00795		205	37	0.52874	3.45214	2.36723	3.86399	68	0.90504	0.83232	0.79111	0.68257	0.55212	0.43053	0.33227	150	11594541300	11056914661	10193289081
000002			D5-1																	58434253	0.99898	0.003228		251	33	0.66593	1.9573	9.07214	0.144567	73	0.98883	0.98452	0.96499	0.82016	0.62088	0.44563	0.30156	150	8765137950	8133681477	7647503193
000002			D5-2																	64908558	0.998689	0.003259		252	33	0.669135	2.08442	11.7272	0.0865845	80	0.98904	0.98494	0.96668	0.83953	0.66186	0.50096	0.36718	150	9736283700	9035674694	8495834725
000002			D5-3																	61210835	0.998881	0.00316		249	32	0.664842	1.99908	9.55167	0.161967	76	0.98876	0.98452	0.96729	0.83453	0.64368	0.47189	0.3292	150	9181625250	8532949990	8023058601
000002			D6-1																	58862893	0.998636	0.002919		258	33	0.681507	1.97206	9.55172	0.0941054	75	0.98904	0.98528	0.96793	0.83069	0.63569	0.46241	0.31974	150	8829433950	8241965877	7749458886
000002			D6-2																	59331117	0.998918	0.003188		250	32	0.666543	1.94244	9.00427	0.129903	74	0.98889	0.98484	0.96674	0.82696	0.63044	0.45555	0.31132	150	8899667550	8272783484	7778529947
000002			D6-3																	62246829	0.998695	0.003076		251	32	0.669055	1.99869	10.1506	0.0968654	77	0.98892	0.98508	0.96848	0.83909	0.65264	0.48356	0.34283	150	9337024350	8692902751	8173920590
000002			F7-1																	60775205	0.998707	0.003647		251	32	0.661225	2.02114	10.2738	0.0777948	74	0.98993	0.98516	0.9629	0.82035	0.6288	0.46006	0.32232	150	9116280750	8409467182	7906664967
000002			F7-2																	59684328	0.998817	0.003315		260	33	0.67718	1.98609	9.48966	0.130567	75	0.99005	0.98553	0.96574	0.82863	0.63542	0.46432	0.32428	150	8952649200	8293096565	7797357206
000002			F7-3																	60276798	0.998812	0.003263		251	32	0.666852	2.06972	10.8956	0.0810587	74	0.98992	0.98491	0.96065	0.81443	0.62354	0.45654	0.32215	150	9041519700	8395327968	7893647777
000002			M8-1																	59337678	0.999015	0.003205		250	32	0.665037	1.93972	8.33844	0.153529	74	0.98896	0.98506	0.96777	0.83051	0.6339	0.45811	0.31214	150	8900651700	8259169578	7765410372
000002			M8-2																	59980002	0.998667	0.003695		248	32	0.657782	1.98282	9.96779	0.0740263	74	0.98896	0.98484	0.96452	0.81999	0.62493	0.45289	0.31188	150	8997000300	8292416972	7796577142
000002			M8-3																	61090935	0.998067	0.00328		244	32	0.656918	1.96762	9.57764	0.1186	75	0.98879	0.9845	0.96529	0.82643	0.63429	0.46226	0.31968	150	9163640250	8498459351	7990539829
000003			D5-1																	54821403	0.999534	0.002762		227	35	0.595667	2.59867	14.7349	1.01631	66	0.97828	0.93734	0.87403	0.71358	0.54643	0.40329	0.29176	150	8223210450	8042486781	7688664732
000003			D5-2																	54328113	0.999657	0.001772		249	38	0.63095	2.48992	12.4009	1.25695	70	0.97944	0.94533	0.89097	0.74452	0.58292	0.43633	0.31821	150	8149216950	8034030400	7798818242
000003			D5-3																	57336487	0.999587	0.002554		233	33	0.601655	2.50404	13.2027	1.24295	71	0.97841	0.94265	0.88686	0.74181	0.58303	0.439	0.32255	150	8600473050	8424263834	8070584703
000003			D6-1																	57049813	0.999562	0.001858		245	38	0.625986	2.51862	13.521	1.11255	73	0.97931	0.94592	0.89356	0.75343	0.59708	0.45413	0.3376	150	8557471950	8429147339	8171763532
000003			D6-2																	57171639	0.999676	0.00173		248	38	0.629117	2.46736	12.2198	1.31681	74	0.97967	0.94789	0.89713	0.76098	0.60706	0.46337	0.34418	150	8575745850	8458062555	8214086928
000003			D6-3																	56138669	0.99964	0.001665		239	36	0.619612	2.60243	15.7425	0.918621	69	0.97879	0.94085	0.88258	0.73258	0.57317	0.43281	0.3214	150	8420800350	8313703008	8084181497
000003			F7-1																	75591721	0.999597	0.0018		228	33	0.599044	2.48064	11.9603	1.39812	92	0.98023	0.95511	0.91688	0.81506	0.69528	0.5735	0.46137	150	11338758150	11177403797	10850390285
000003			F7-2																	57721788	0.999648	0.001773		246	37	0.625633	2.47745	11.3531	1.48415	75	0.98063	0.9493	0.89919	0.76339	0.61078	0.46728	0.34762	150	8658268200	8535954981	8286906057
000003			F7-3																	55046551	0.999584	0.002661		234	33	0.60308	2.5605	13.2596	1.1853	68	0.9796	0.94165	0.88243	0.72908	0.56486	0.41895	0.30356	150	8256982650	8081642593	7732623387
000003			M8-1																	59631001	0.999621	0.001776		232	34	0.605704	2.54512	13.6806	1.09839	73	0.97855	0.9441	0.89133	0.75224	0.59877	0.45806	0.34234	150	8944650150	8818486288	8564872341
000003			M8-2																	53717077	0.99959	0.002401		229	32	0.596205	2.46861	12.2551	1.45243	66	0.97808	0.93931	0.87814	0.72036	0.5512	0.40242	0.28562	150	8057561550	7900891823	7578755089
000003			M8-3																	52227309	0.999643	0.001881		232	33	0.604778	2.51278	12.6472	1.32519	65	0.97822	0.93848	0.87576	0.71287	0.54068	0.3917	0.27671	150	7834096350	7713056361	7467505709
101630_keyan			D5-1																	368660279	0.997883	0.002373		213	43	0.588085	2.66998	8.72543	2.13719	250	0.99587	0.99485	0.99389	0.98247	0.96356	0.94232	0.92108	150	55299041850	54510164627	53024259063
101630_keyan			D5-2																	382687324	0.996967	0.002366		214	45	0.595093	2.70904	9.94952	1.20129	250	0.9959	0.99492	0.99406	0.98251	0.96323	0.94176	0.9206	150	57403098600	56550033908	55002728202
101630_keyan			D5-3																	450864125	0.99679	0.002366		212	44	0.591655	2.64833	9.69106	1.34838	250	0.99594	0.995	0.99444	0.9875	0.97266	0.95541	0.93758	150	67629618750	66621628526	64795132677
101630_keyan			D6-1																	461930662	0.997587	0.002334		213	45	0.592828	2.63993	8.7555	2.03919	250	0.99599	0.99501	0.99453	0.9901	0.97857	0.96382	0.94754	150	69289599300	68303142369	66426314500
101630_keyan			D6-2																	482066672	0.998241	0.002581		217	47	0.595641	2.67597	9.18763	1.72109	250	0.99608	0.99511	0.99468	0.99072	0.97932	0.96466	0.94849	150	72310000800	71158613367	68991031743
101630_keyan			D6-3																	358785509	0.998203	0.002536		217	46	0.598761	2.73635	10.2952	0.963344	250	0.99598	0.99494	0.99407	0.98225	0.96172	0.93894	0.91646	150	53817826350	52993112797	51441949159
101630_keyan			F7-1																	457267336	0.997342	0.002439		216	45	0.592855	2.71703	9.71112	1.32103	250	0.99595	0.99504	0.9945	0.98745	0.97261	0.95551	0.93767	150	68590100400	67414401981	65207463617
101630_keyan			F7-2																	389339866	0.997125	0.002336		209	44	0.593412	2.7307	9.67096	1.32939	250	0.99585	0.99486	0.99406	0.98304	0.96414	0.94346	0.92247	150	58400979900	57564027973	56035596044
101630_keyan			F7-3																	380772892	0.998167	0.002478		208	44	0.592203	2.77608	9.98993	1.16942	250	0.9958	0.99483	0.99399	0.98239	0.96284	0.94103	0.91906	150	57115933800	56269326460	54679867028
101630_keyan			M8-1																	369917907	0.997381	0.002379		212	44	0.592963	2.69354	9.45166	1.62902	250	0.99586	0.99482	0.99394	0.98191	0.96221	0.94057	0.91881	150	55487686050	54666957855	53158889489
101630_keyan			M8-2																	473136568	0.997837	0.002396		220	46	0.597327	2.68378	9.98385	1.06935	250	0.996	0.99507	0.99464	0.98987	0.97734	0.96176	0.94488	150	70970485200	69958385034	68054153408
101630_keyan			M8-3																	383446882	0.997705	0.002481		212	44	0.594387	2.76701	10.3295	1.05688	250	0.99587	0.99482	0.99407	0.98282	0.96329	0.94163	0.91993	150	57517032300	56651143649	55058471592
101630_linchuang			D5-1																	371133530	0.996664	0.001809		215	46	0.598555	2.7401	10.3654	1.06232	250	0.99599	0.99499	0.9942	0.98348	0.96391	0.94201	0.9199	150	55670029500	54845346295	53251226365
101630_linchuang			D5-2																	349534453	0.998101	0.001701		210	44	0.59348	2.79349	10.7572	1.03496	250	0.99582	0.99479	0.99356	0.97825	0.95499	0.93038	0.90707	150	52430167950	51734927380	50281349905
101630_linchuang			D5-3																	376647623	0.997855	0.001743		213	45	0.595238	2.7347	10.2079	1.15222	250	0.99591	0.99491	0.99415	0.98349	0.96425	0.94255	0.92088	150	56497143450	55755222980	54209192191
101630_linchuang			D6-1																	333550333	0.998023	0.001673		213	45	0.596149	2.76744	10.5787	1.00335	250	0.99585	0.99481	0.99373	0.97892	0.95538	0.93035	0.90598	150	50032549950	49378283873	48027722594
101630_linchuang			D6-2																	372549232	0.998418	0.00182		213	44	0.58973	2.72605	8.36845	2.71228	250	0.99584	0.99487	0.99388	0.98327	0.96516	0.94457	0.923	150	55882384800	55109944978	53512588559
101630_linchuang			D6-3																	420132505	0.997831	0.002104		213	44	0.588466	2.74445	8.58895	2.61311	250	0.99589	0.99492	0.99419	0.98636	0.97113	0.9531	0.93399	150	63019875750	61972424315	59982708792
101630_linchuang			F7-1																	327814874	0.997411	0.001785		213	44	0.595476	2.79477	10.9339	1.01154	250	0.99578	0.9948	0.99334	0.97624	0.95195	0.92631	0.90187	150	49172231100	48485203289	47110800199
101630_linchuang			F7-2																	359715993	0.997623	0.001687		214	45	0.595996	2.77582	10.1452	1.14028	250	0.99585	0.9949	0.99405	0.98165	0.96084	0.93796	0.91527	150	53957398950	53238054889	51770987165
101630_linchuang			F7-3																	415944663	0.998393	0.001759		215	44	0.589763	2.72742	8.35946	2.76114	250	0.99586	0.99494	0.99428	0.98689	0.97187	0.95395	0.9349	150	62391699450	61565240252	59812175740
101630_linchuang			M8-1																	344256626	0.997231	0.001775		217	46	0.599384	2.74455	10.5424	1.12235	250	0.99589	0.99489	0.99378	0.97975	0.95782	0.93402	0.91072	150	51638493900	50898335602	49439567622
101630_linchuang			M8-2																	432117971	0.99774	0.002187		209	43	0.586681	2.66081	9.15788	1.71804	250	0.99584	0.99491	0.99432	0.98653	0.97084	0.95289	0.93436	150	64817695650	63713375699	61609343329
101630_linchuang			M8-3																	406228005	0.997856	0.002096		213	45	0.590051	2.71159	8.88293	1.93672	250	0.99587	0.99491	0.99429	0.98587	0.96937	0.95024	0.93026	150	60934200750	59937764737	58032546289
301152_Nextseq			D5-1																	22323546	0.999026	0.004173		228	70	0.450727	1.25571	0.865622	3.06697	101	0.99031	0.98834	0.98684	0.98224	0.95202	0.81683	0.53022	150	3348531900	3125100062	2993004672
301152_Nextseq			D5-2																	21000025	0.998942	0.004336		238	74	0.455266	1.24113	1.05156	2.74102	97	0.99026	0.98841	0.98687	0.9815	0.94604	0.78226	0.46231	150	3150003750	2927980467	2802413150
301152_Nextseq			D5-3																	20498482	0.999005	0.004258		237	74	0.453173	1.28179	0.913897	2.73699	95	0.99376	0.99152	0.98947	0.97282	0.90311	0.7334	0.4343	150	3074772300	2867042986	2746052818
301152_Nextseq			D6-1																	20724966	0.998939	0.004107		237	74	0.455269	1.25444	0.934298	2.86514	96	0.99041	0.98835	0.98677	0.98119	0.94057	0.76462	0.4401	150	3108744900	2900842936	2780988390
301152_Nextseq			D6-2																	20417859	0.998948	0.004233		239	75	0.454214	1.2811	1.21376	2.5257	95	0.99378	0.9915	0.98947	0.97298	0.90359	0.7352	0.43208	150	3062678850	2850527716	2731162423
301152_Nextseq			D6-3																	20965171	0.998961	0.004275		235	73	0.453552	1.24821	0.994806	2.97028	97	0.99031	0.98854	0.98692	0.98139	0.94173	0.7707	0.44921	150	3144775650	2930094737	2804563669
301152_Nextseq			F7-1																	19834341	0.998978	0.004147		236	73	0.454524	1.24385	1.00905	2.89289	92	0.99033	0.98823	0.98658	0.97994	0.9263	0.70947	0.36122	150	2975151150	2776138922	2660687485
301152_Nextseq			F7-2																	20614739	0.998971	0.00467		237	74	0.4527	1.25606	1.19492	2.78885	95	0.99031	0.98846	0.98691	0.98094	0.93742	0.75072	0.419	150	3092210850	2864378977	2734051000
301152_Nextseq			F7-3																	20784982	0.999012	0.004315		238	74	0.453378	1.30063	1.41421	2.53896	96	0.99371	0.99167	0.98971	0.9737	0.90677	0.74538	0.45153	150	3117747300	2903617748	2779223545
301152_Nextseq			M8-1																	21982825	0.999019	0.004059		234	73	0.454237	1.24932	0.962766	2.93239	101	0.99035	0.98841	0.98689	0.98239	0.95346	0.8179	0.52765	150	3297423750	3083331900	2957274391
301152_Nextseq			M8-2																	21241259	0.998986	0.004161		238	74	0.455615	1.25652	1.0725	2.93202	98	0.99042	0.98856	0.98694	0.98198	0.94795	0.79091	0.48133	150	3186188850	2975284658	2851625973
301152_Nextseq			M8-3																	20527254	0.998974	0.004031		236	74	0.456147	1.24417	1.08683	2.83083	95	0.9906	0.98852	0.98689	0.98134	0.93872	0.75412	0.42088	150	3079088100	2880094147	2763200734
301152_Novaseq			D5-1																	59332329	0.998847	0.002223		180	51	0.60899	1.56964	5.08421	1.12919	62	0.99399	0.988	0.97813	0.84262	0.54399	0.27884	0.12159	150	8899849350	8693356849	8366809303
301152_Novaseq			D5-2																	69388172	0.998814	0.002393		206	59	0.619281	1.56747	6.2938	1.15612	79	0.99508	0.99037	0.98573	0.92863	0.74198	0.49875	0.29396	150	10408225800	10174877989	9785791686
301152_Novaseq			D5-3																	65889173	0.998666	0.002327		180	50	0.602608	1.56574	4.81474	1.3787	69	0.99482	0.98939	0.98136	0.88363	0.63226	0.36892	0.18585	150	9883375950	9620021216	9248487965
301152_Novaseq			D6-1																	67618226	0.99868	0.002122		164	46	0.610395	1.58877	3.4261	1.55348	67	0.99333	0.98771	0.98001	0.87221	0.60582	0.34175	0.1655	150	10142733900	9923247728	9564781642
301152_Novaseq			D6-2																	66989787	0.998855	0.002184		178	50	0.606824	1.56947	4.47436	1.20853	70	0.99458	0.98926	0.98189	0.89165	0.64662	0.3794	0.18893	150	10048468050	9826148415	9463078914
301152_Novaseq			D6-3																	58503299	0.998979	0.002241		187	53	0.611783	1.57055	4.27342	1.37141	63	0.99422	0.98875	0.97975	0.85323	0.55968	0.29031	0.12684	150	8775494850	8586952390	8270142222
301152_Novaseq			F7-1																	62464387	0.998897	0.002267		190	53	0.611001	1.55538	5.04284	1.23215	68	0.99423	0.98882	0.98207	0.88578	0.62574	0.35752	0.17329	150	9369658050	9165304449	8823593020
301152_Novaseq			F7-2																	64888391	0.998882	0.002271		181	50	0.60498	1.55395	5.51772	1.1781	69	0.99404	0.9885	0.98191	0.88977	0.637	0.36787	0.1794	150	9733258650	9489069951	9125739422
301152_Novaseq			F7-3																	68153962	0.998763	0.002223		175	49	0.60949	1.57095	4.73925	1.32182	71	0.99468	0.9891	0.98182	0.89384	0.65432	0.39025	0.1983	150	10223094300	9994700860	9620529535
301152_Novaseq			M8-1																	63603913	0.998833	0.002391		205	58	0.612047	1.60702	6.5776	1.17371	71	0.9951	0.99005	0.98303	0.89007	0.6467	0.39387	0.2112	150	9540586950	9327679481	8977629795
301152_Novaseq			M8-2																	66947202	0.998889	0.002205		163	46	0.610221	1.56886	4.4314	1.4485	66	0.99334	0.98766	0.97933	0.8649	0.58983	0.32474	0.15402	150	10042080300	9796470170	9417784841
301152_Novaseq			M8-3																	69650510	0.998837	0.002083		172	48	0.595522	1.62006	4.70689	1.58599	69	0.99392	0.98861	0.9817	0.8844	0.63131	0.37304	0.19582	150	10447576500	10214402289	9844315938
308004_MGI2000			D5-1																	96789232	0.999682	0.005069		224	55	0.565499	1.45073	3.33527	0.163656	157	0.98993	0.98756	0.98646	0.98352	0.97183	0.93583	0.86394	150	14518384800	14030466666	12926492792
308004_MGI2000			D5-2																	90575416	0.999686	0.00497		221	54	0.564118	1.43752	2.60927	0.181451	146	0.9898	0.98743	0.98626	0.98269	0.96772	0.92202	0.83327	150	13586312400	13138467471	12112065828
308004_MGI2000			D5-3																	100492901	0.999676	0.005127		223	56	0.565341	1.43281	2.72184	0.219372	163	0.99001	0.98763	0.98653	0.98394	0.97495	0.94621	0.88489	150	15073935150	14569195843	13415618601
308004_MGI2000			D6-1																	96214903	0.999691	0.005238		226	57	0.567241	1.44651	2.80094	0.220053	157	0.99006	0.98763	0.98657	0.98367	0.97253	0.93773	0.86657	150	14432235450	13919311989	12762568805
308004_MGI2000			D6-2																	84809540	0.999647	0.005212		225	56	0.567089	1.44308	2.47456	0.288253	138	0.98992	0.9875	0.98622	0.98198	0.96249	0.90503	0.79857	150	12721431000	12286983528	11307841656
308004_MGI2000			D6-3																	95731071	0.999678	0.004984		227	58	0.570983	1.44682	3.00951	0.261152	157	0.99011	0.98771	0.98659	0.98359	0.97228	0.93691	0.86508	150	14359660650	13898950604	12839263545
308004_MGI2000			F7-1																	97847772	0.999678	0.005244		225	55	0.564139	1.47581	3.1048	0.195386	159	0.99084	0.98859	0.98748	0.98406	0.97054	0.93257	0.86059	150	14677165800	14155564416	12987283009
308004_MGI2000			F7-2																	87009032	0.999694	0.004932		226	56	0.567676	1.47003	2.57589	0.18017	142	0.99089	0.98853	0.98733	0.98263	0.96179	0.90503	0.80576	150	13051354800	12626853990	11650448515
308004_MGI2000			F7-3																	113251288	0.999612	0.005246		225	57	0.566752	1.45442	2.58039	0.241461	184	0.99109	0.9888	0.98785	0.98564	0.97904	0.95943	0.91737	150	16987693200	16409411437	15120320752
308004_MGI2000			M8-1																	94184139	0.999698	0.004831		222	55	0.566023	1.44678	2.81903	0.174156	152	0.99001	0.98764	0.98653	0.98337	0.97079	0.93147	0.85308	150	14127620850	13667977439	12605700191
308004_MGI2000			M8-2																	84427183	0.999642	0.005141		228	57	0.567879	1.44101	2.57342	0.287545	138	0.99003	0.98764	0.98647	0.98211	0.96221	0.90423	0.79742	150	12664077450	12240834596	11284805143
308004_MGI2000			M8-3																	98537777	0.999677	0.004918		226	57	0.56816	1.43582	2.60794	0.299069	161	0.99014	0.98788	0.9868	0.98413	0.97447	0.94375	0.87904	150	14780666550	14307964075	13213169276
308004_Novaseq	1		D5-1
308004_Novaseq	1		D5-2
308004_Novaseq	1		D5-3
308004_Novaseq	1		D6-1
308004_Novaseq	1		D6-2
308004_Novaseq	1		D6-3
308004_Novaseq	1		F7-1
308004_Novaseq	1		F7-2
308004_Novaseq	1		F7-3
308004_Novaseq	1		M8-1
308004_Novaseq	1		M8-2
308004_Novaseq	1		M8-3
